# Supplementary material
Source: PubMed Central journal article supplement (PMC5026328)
Supplement: NIHMS700515-supplement-SupportingInformation.pdf [file NIHMS700515-supplement-SupportingInformation.pdf]

TABLE OF CONTENTS

| Information                                                                                           | Page |
|-------------------------------------------------------------------------------------------------------|------|
| 500 MHz <sup>1</sup> H NMR spectrum of compound <b>1</b> in CDCl <sub>3</sub>                         | S-4  |
| Expansions of the <sup>1</sup> H NMR spectrum of compound <b>1</b> in CDCl <sub>3</sub>               | S-5  |
| 125 MHz <sup>13</sup> C NMR spectrum of <b>1</b> compound in CDCl <sub>3</sub>                        | S-6  |
| 500 MHz <sup>1</sup> H NMR spectrum of <b>2</b> compound in CDCl <sub>3</sub>                         | S-7  |
| Expansions of the <sup>1</sup> H NMR spectrum of compound <b>2</b> in CDCl <sub>3</sub>               | S-8  |
| 125 MHz <sup>13</sup> C NMR spectrum of compound <b>2</b> in CDCl <sub>3</sub>                        | S-9  |
| 500 MHz <sup>1</sup> H NMR spectrum of compound <b>3</b> in CDCl <sub>3</sub>                         | S-10 |
| Expansions of the <sup>1</sup> H NMR spectrum of compound <b>3</b> in CDCl <sub>3</sub>               | S-11 |
| 125 MHz <sup>13</sup> C NMR spectrum of compound <b>3</b> in CDCl <sub>3</sub>                        | S-12 |
| gCOSY spectrum of compound <b>3</b> in CDCl <sub>3</sub>                                              | S-13 |
| Expanded gCOSY spectrum of compound <b>3</b> in CDCl <sub>3</sub>                                     | S-14 |
| 500 MHz <sup>1</sup> H NMR spectrum of compound <b>4a</b> in CDCl <sub>3</sub>                        | S-15 |
| Expansions of the <sup>1</sup> H NMR spectrum of compound <b>4a</b> in CDCl <sub>3</sub>              | S-16 |
| 125 MHz <sup>13</sup> C NMR spectrum of compound <b>4a</b> in CDCl <sub>3</sub>                       | S-17 |
| gCOSY spectrum of compound <b>4a</b> in CDCl <sub>3</sub>                                             | S-18 |
| NOESY spectrum of compound <b>4a</b> in CDCl <sub>3</sub>                                             | S-19 |
| 500 MHz <sup>1</sup> H NMR spectrum of compound <b>4b</b> in CDCl <sub>3</sub>                        | S-20 |
| Expansions of the <sup>1</sup> H NMR spectrum of compound <b>4b</b> in CDCl <sub>3</sub>              | S-21 |
| 125 MHz <sup>13</sup> C NMR spectrum of compound <b>4b</b> in CDCl <sub>3</sub>                       | S-22 |
| gCOSY spectrum of compound <b>4b</b> in CDCl <sub>3</sub>                                             | S-23 |
| NOESY spectrum of compound <b>4b</b> in CDCl <sub>3</sub>                                             | S-24 |
| 500 MHz <sup>1</sup> H NMR spectrum of compound <b>5</b> in CDCl <sub>3</sub>                         | S-25 |
| Expansions of the <sup>1</sup> H NMR spectrum of compound <b>5</b> in CDCl <sub>3</sub>               | S-26 |
| 125 MHz <sup>13</sup> C NMR spectrum of compound <b>5</b> in CDCl <sub>3</sub>                        | S-27 |
| 500 MHz <sup>1</sup> H NMR spectrum of compound <b>6</b> in CDCl <sub>3</sub>                         | S-28 |
| Expansions of the <sup>1</sup> H NMR spectrum of compound <b>6</b> in CDCl <sub>3</sub>               | S-29 |
| 125 MHz <sup>13</sup> C NMR spectrum of compound <b>6</b> in CDCl <sub>3</sub>                        | S-30 |
| 500 MHz <sup>1</sup> H NMR spectrum of compound <b>7</b> in C <sub>6</sub> D <sub>6</sub>             | S-31 |
| Expansions of the <sup>1</sup> H NMR spectrum of compound <b>7</b> in C <sub>6</sub> D <sub>6</sub>   | S-32 |
| 125 MHz <sup>13</sup> C NMR spectrum of compound <b>7</b> in C <sub>6</sub> D <sub>6</sub>            | S-33 |
| gCOSY spectrum of compound <b>7</b> in C <sub>6</sub> D <sub>6</sub>                                  | S-34 |
| NOESY spectrum of compound <b>7</b> in C <sub>6</sub> D <sub>6</sub>                                  | S-35 |
| 500 MHz <sup>1</sup> H NMR spectrum of compound <b>8</b> in CDCl <sub>3</sub>                         | S-36 |
| Expansions of the <sup>1</sup> H NMR spectrum of compound <b>8</b> in CDCl <sub>3</sub>               | S-37 |
| 125 MHz <sup>13</sup> C NMR spectrum of compound <b>8</b> in CDCl <sub>3</sub>                        | S-38 |
| 500 MHz <sup>1</sup> H NMR spectrum of compound <b>9</b> in CDCl <sub>3</sub>                         | S-39 |
| Expansions of the <sup>1</sup> H NMR spectrum of compound <b>9</b> in CDCl <sub>3</sub>               | S-40 |
| 125 MHz <sup>13</sup> C NMR spectrum of compound <b>9</b> in CDCl <sub>3</sub>                        | S-41 |
| NOESY spectrum of compound <b>9</b> in CDCl <sub>3</sub>                                              | S-42 |
| Expanded NOESY spectrum of compound <b>9</b> in CDCl <sub>3</sub>                                     | S-43 |
| 500 MHz <sup>1</sup> H NMR spectrum of isomers <b>10a</b> + <b>10b</b> in CDCl <sub>3</sub>           | S-44 |
| Expansions of the <sup>1</sup> H NMR spectrum of isomers <b>10a</b> + <b>10b</b> in CDCl <sub>3</sub> | S-45 |

|                                                                                                   |      |
|---------------------------------------------------------------------------------------------------|------|
| 125 MHz $^{13}\text{C}$ NMR spectrum of isomers <b>10a</b> + <b>10b</b> in $\text{CDCl}_3$        | S-46 |
| gCOSY spectrum of isomers <b>10a</b> + <b>10b</b> in $\text{CDCl}_3$                              | S-47 |
| NOESY spectrum of isomers <b>10a</b> + <b>10b</b> in $\text{CDCl}_3$                              | S-48 |
| HMBC spectrum of isomers <b>10a</b> + <b>10b</b> in $\text{CDCl}_3$                               | S-49 |
| 500 MHz $^1\text{H}$ NMR spectrum of isomers <b>11a</b> + <b>11b</b> in $\text{CDCl}_3$           | S-50 |
| Expansions of the $^1\text{H}$ NMR spectrum of isomers <b>11a</b> + <b>11b</b> in $\text{CDCl}_3$ | S-51 |
| 125 MHz $^{13}\text{C}$ NMR spectrum of isomers <b>11a</b> + <b>11b</b> in $\text{CDCl}_3$        | S-52 |
| 500 MHz $^1\text{H}$ NMR spectrum of isomers <b>12a</b> + <b>12b</b> in $\text{CDCl}_3$           | S-53 |
| Expansions of the $^1\text{H}$ NMR spectrum of isomers <b>12a</b> + <b>12b</b> in $\text{CDCl}_3$ | S-54 |
| 125 MHz $^{13}\text{C}$ NMR spectrum of isomers <b>12a</b> + <b>12b</b> in $\text{CDCl}_3$        | S-55 |
| 500 MHz $^1\text{H}$ NMR spectrum of compound <b>13</b> in $\text{CDCl}_3$                        | S-56 |
| Expansions of the $^1\text{H}$ NMR spectrum of compound <b>13</b> in $\text{CDCl}_3$              | S-57 |
| 125 MHz $^{13}\text{C}$ NMR spectrum of compound <b>13</b> in $\text{CDCl}_3$                     | S-58 |
| 500 MHz $^1\text{H}$ NMR spectrum of compound <b>14</b> in $\text{CDCl}_3$                        | S-59 |
| Expansions of the $^1\text{H}$ NMR spectrum of compound <b>14</b> in $\text{CDCl}_3$              | S-60 |
| 125 MHz $^{13}\text{C}$ NMR spectrum of compound <b>14</b> in $\text{CDCl}_3$                     | S-61 |
| NOESY spectrum of compound <b>14</b> in $\text{CDCl}_3$                                           | S-62 |
| Expanded NOESY spectrum of compound <b>14</b> in $\text{CDCl}_3$                                  | S-63 |
| 500 MHz $^1\text{H}$ NMR spectrum of isomers <b>15a</b> + <b>15b</b> in $\text{CDCl}_3$           | S-64 |
| Expansions of the $^1\text{H}$ NMR spectrum of isomers <b>15a</b> + <b>15b</b> in $\text{CDCl}_3$ | S-65 |
| 125 MHz $^{13}\text{C}$ NMR spectrum of isomers <b>15a</b> + <b>15b</b> in $\text{CDCl}_3$        | S-66 |
| NOESY spectrum of isomers <b>15a</b> + <b>15b</b> in $\text{CDCl}_3$                              | S-67 |
| HMBC spectrum of isomers <b>15a</b> + <b>15b</b> in $\text{CDCl}_3$                               | S-68 |
| 500 MHz $^1\text{H}$ NMR spectrum of isomers <b>16a</b> + <b>16b</b> in $\text{CDCl}_3$           | S-69 |
| Expansions of the $^1\text{H}$ NMR spectrum of isomers <b>16a</b> + <b>16b</b> in $\text{CDCl}_3$ | S-70 |
| 125 MHz $^{13}\text{C}$ NMR spectrum of isomers <b>16a</b> + <b>16b</b> in $\text{CDCl}_3$        | S-71 |
| 500 MHz $^1\text{H}$ NMR spectrum of compound <b>17</b> in $\text{CDCl}_3$                        | S-72 |
| Expansions of the $^1\text{H}$ NMR spectrum of compound <b>17</b> in $\text{CDCl}_3$              | S-73 |
| 125 MHz $^{13}\text{C}$ NMR spectrum of compound <b>17</b> in $\text{CDCl}_3$                     | S-74 |
| 500 MHz $^1\text{H}$ NMR spectrum of compound <b>18a</b> in $\text{CDCl}_3$                       | S-75 |
| Expansions of the $^1\text{H}$ NMR spectrum of compound <b>18a</b> in $\text{CDCl}_3$             | S-76 |
| 125 MHz $^{13}\text{C}$ NMR spectrum of compound <b>18a</b> in $\text{CDCl}_3$                    | S-77 |
| NOESY spectrum of compound <b>18a</b> in $\text{CDCl}_3$                                          | S-78 |
| 500 MHz $^1\text{H}$ NMR spectrum of compound <b>18b</b> in $\text{CDCl}_3$                       | S-79 |
| Expansions of the $^1\text{H}$ NMR spectrum of compound <b>18b</b> in $\text{CDCl}_3$             | S-80 |
| 125 MHz $^{13}\text{C}$ NMR spectrum of compound <b>18b</b> in $\text{CDCl}_3$                    | S-81 |
| NOESY spectrum of compound <b>18b</b> in $\text{CDCl}_3$                                          | S-82 |
| 500 MHz $^1\text{H}$ NMR spectrum of compound <b>19</b> in $\text{CDCl}_3$                        | S-83 |
| Expansions of the $^1\text{H}$ NMR spectrum of compound <b>19</b> in $\text{CDCl}_3$              | S-84 |
| 125 MHz $^{13}\text{C}$ NMR spectrum of compound <b>19</b> in $\text{CDCl}_3$                     | S-85 |
| 500 MHz $^1\text{H}$ NMR spectrum of compound <b>20</b> in $\text{CDCl}_3$                        | S-86 |
| Expansions of the $^1\text{H}$ NMR spectrum of compound <b>20</b> in $\text{CDCl}_3$              | S-87 |
| 125 MHz $^{13}\text{C}$ NMR spectrum of compound <b>20</b> in $\text{CDCl}_3$                     | S-88 |
| 500 MHz $^1\text{H}$ NMR spectrum of compound <b>21</b> in $\text{CDCl}_3$                        | S-89 |
| Expansions of the $^1\text{H}$ NMR spectrum of compound <b>21</b> in $\text{CDCl}_3$              | S-90 |

|                                                                                                                                            |       |
|--------------------------------------------------------------------------------------------------------------------------------------------|-------|
| 125 MHz <sup>13</sup> C NMR spectrum of compound <b>21</b> in CDCl <sub>3</sub>                                                            | S-91  |
| 500 MHz <sup>1</sup> H NMR spectrum of the bromo alcohol intermediate <i>en route</i> to compound <b>22</b> in CDCl <sub>3</sub>           | S-92  |
| Expansions of the <sup>1</sup> H NMR spectrum of the bromo alcohol intermediate <i>en route</i> to compound <b>22</b> in CDCl <sub>3</sub> | S-93  |
| 125 MHz <sup>13</sup> C NMR spectrum of the bromo alcohol intermediate <i>en route</i> to compound <b>22</b> in CDCl <sub>3</sub>          | S-94  |
| 500 MHz <sup>1</sup> H NMR spectrum of the bromo alcohol intermediate <i>en route</i> to compound <b>23</b> in CDCl <sub>3</sub>           | S-95  |
| Expansions of the <sup>1</sup> H NMR spectrum of the bromo alcohol intermediate <i>en route</i> to compound <b>23</b> in CDCl <sub>3</sub> | S-96  |
| 125 MHz <sup>13</sup> C NMR spectrum of the bromo alcohol intermediate <i>en route</i> to compound <b>23</b> in CDCl <sub>3</sub>          | S-97  |
| 500 MHz <sup>1</sup> H NMR spectrum of compound <b>22</b> in CDCl <sub>3</sub>                                                             | S-98  |
| Expansions of the <sup>1</sup> H NMR spectrum of compound <b>22</b> in CDCl <sub>3</sub>                                                   | S-99  |
| 125 MHz <sup>13</sup> C NMR spectrum of compound <b>22</b> in CDCl <sub>3</sub>                                                            | S-100 |
| 500 MHz <sup>1</sup> H NMR spectrum of compound <b>23</b> in CDCl <sub>3</sub>                                                             | S-101 |
| Expansions of the <sup>1</sup> H NMR spectrum of compound <b>23</b> in CDCl <sub>3</sub>                                                   | S-102 |
| 125 MHz <sup>13</sup> C NMR spectrum of compound <b>23</b> in CDCl <sub>3</sub>                                                            | S-103 |
| gCOSY spectrum of compound <b>23</b> in CDCl <sub>3</sub>                                                                                  | S-104 |
| NOESY spectrum of compound <b>23</b> in CDCl <sub>3</sub>                                                                                  | S-105 |
| gHMQC spectrum of compound <b>23</b> in CDCl <sub>3</sub>                                                                                  | S-106 |
| HMBC spectrum of compound <b>23</b> in CDCl <sub>3</sub>                                                                                   | S-107 |
| 500 MHz <sup>1</sup> H NMR spectrum of compound <b>24</b> in CDCl <sub>3</sub>                                                             | S-108 |
| Expansions of the <sup>1</sup> H NMR spectrum of compound <b>24</b> in CDCl <sub>3</sub>                                                   | S-109 |
| 125 MHz <sup>13</sup> C NMR spectrum of compound <b>24</b> in CDCl <sub>3</sub>                                                            | S-110 |
| gCOSY spectrum of compound <b>24</b> in CDCl <sub>3</sub>                                                                                  | S-111 |
| NOESY spectrum of compound <b>24</b> in CDCl <sub>3</sub>                                                                                  | S-112 |
| gHMQC spectrum of compound <b>24</b> in CDCl <sub>3</sub>                                                                                  | S-113 |
| HMBC spectrum of compound <b>24</b> in CDCl <sub>3</sub>                                                                                   | S-114 |
| IR spectrum of compound <b>24</b>                                                                                                          | S-115 |
| 500 MHz <sup>1</sup> H NMR spectrum of compound <b>25</b> in CDCl <sub>3</sub>                                                             | S-116 |
| Expansions of the <sup>1</sup> H NMR spectrum of compound <b>25</b> in CDCl <sub>3</sub>                                                   | S-117 |
| 125 MHz <sup>13</sup> C NMR spectrum of compound <b>25</b> in CDCl <sub>3</sub>                                                            | S-118 |
| gCOSY spectrum of compound <b>25</b> in CDCl <sub>3</sub>                                                                                  | S-119 |
| NOESY spectrum of compound <b>25</b> in CDCl <sub>3</sub>                                                                                  | S-120 |
| gHMQC spectrum of compound <b>25</b> in CDCl <sub>3</sub>                                                                                  | S-121 |
| HMBC spectrum of compound <b>25</b> in CDCl <sub>3</sub>                                                                                   | S-122 |
| IR spectrum of compound <b>25</b>                                                                                                          | S-123 |

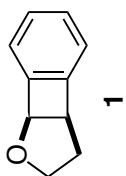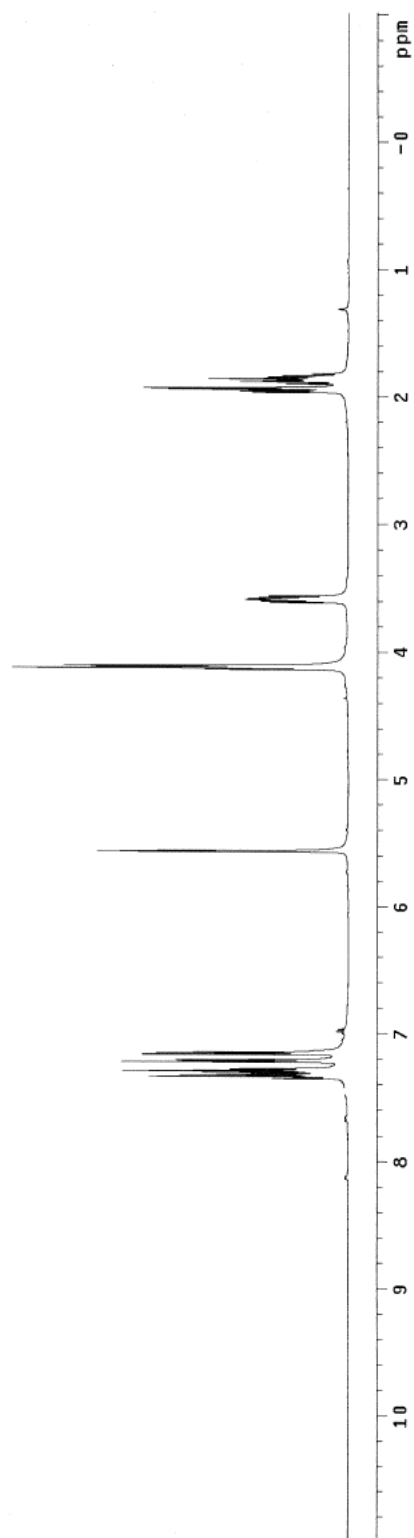

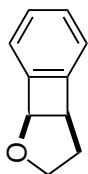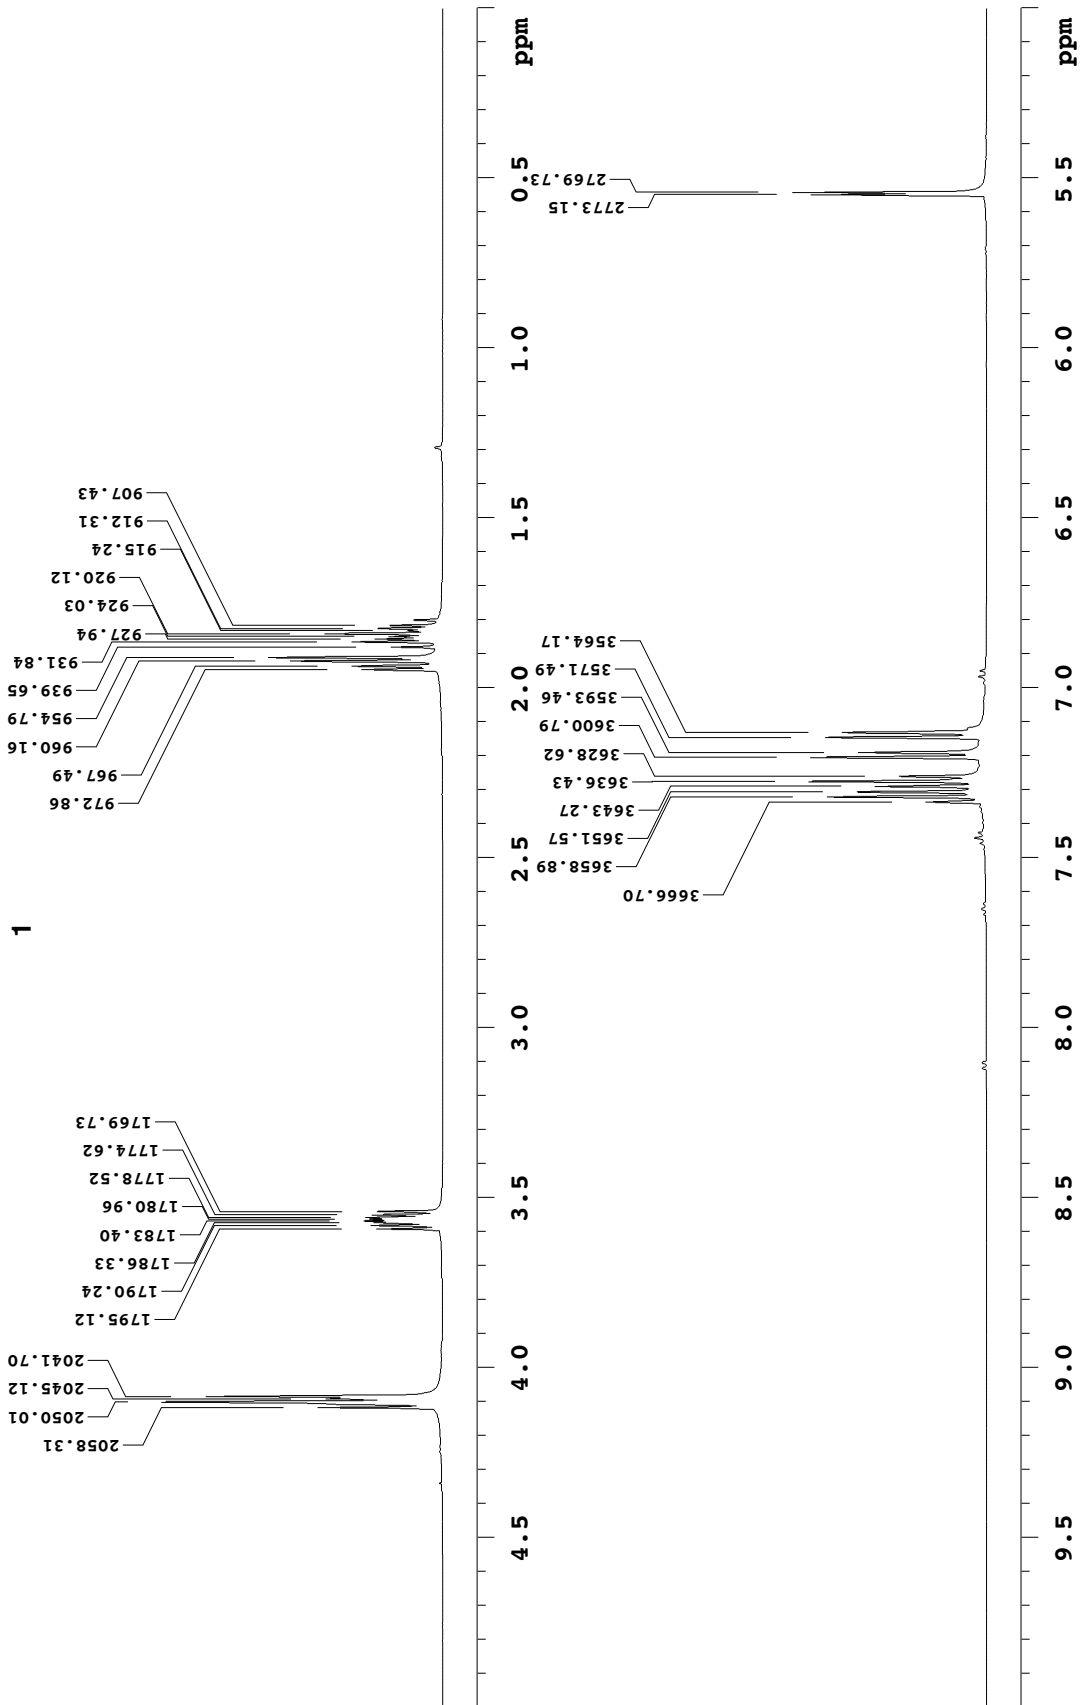

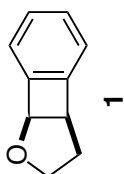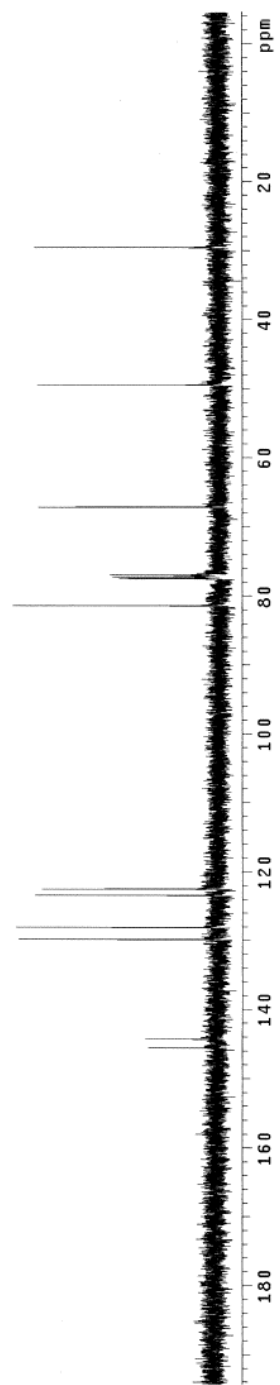

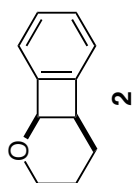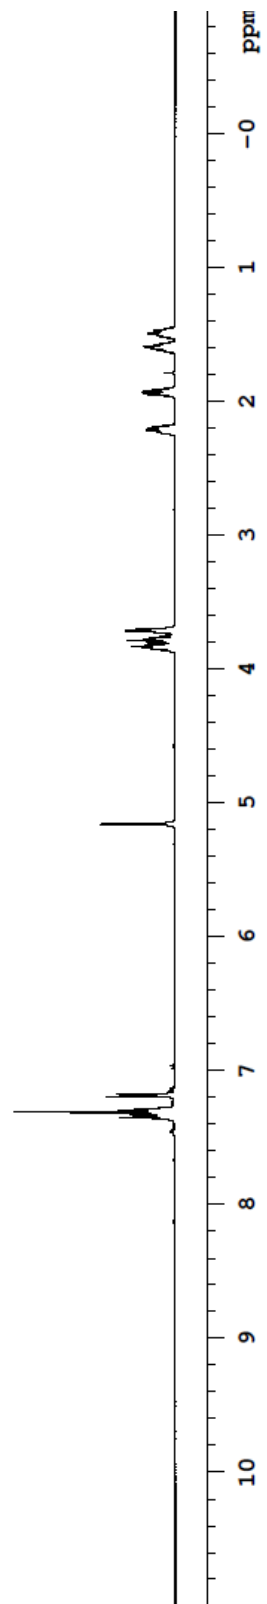

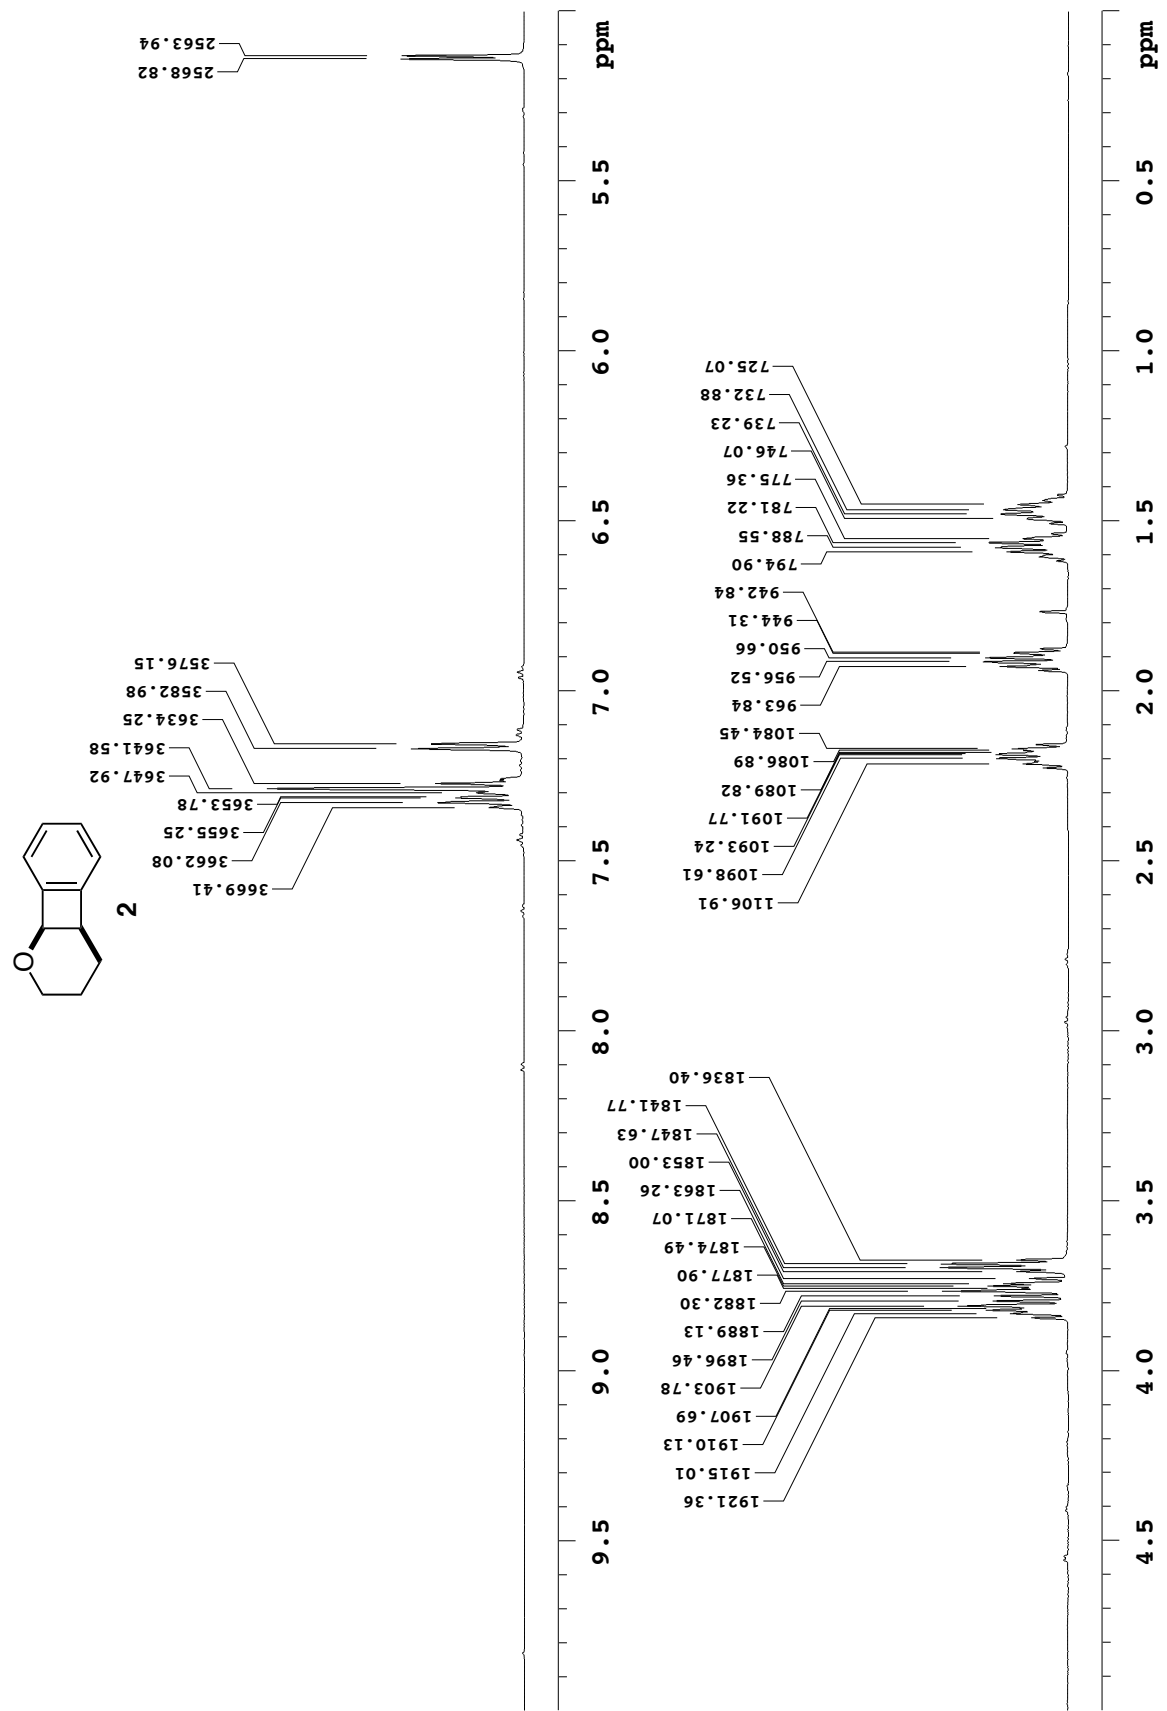



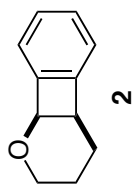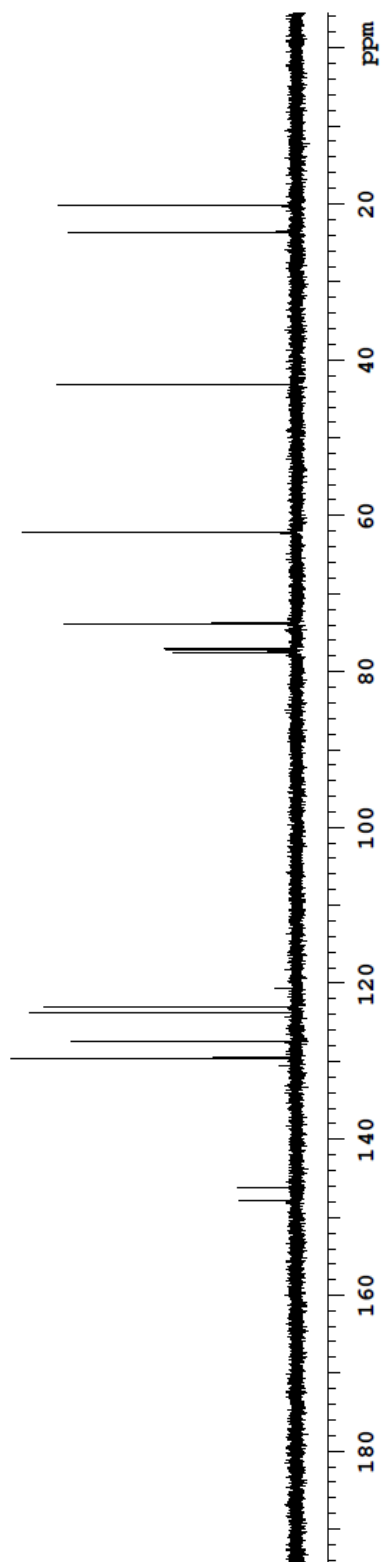

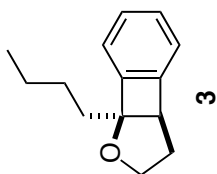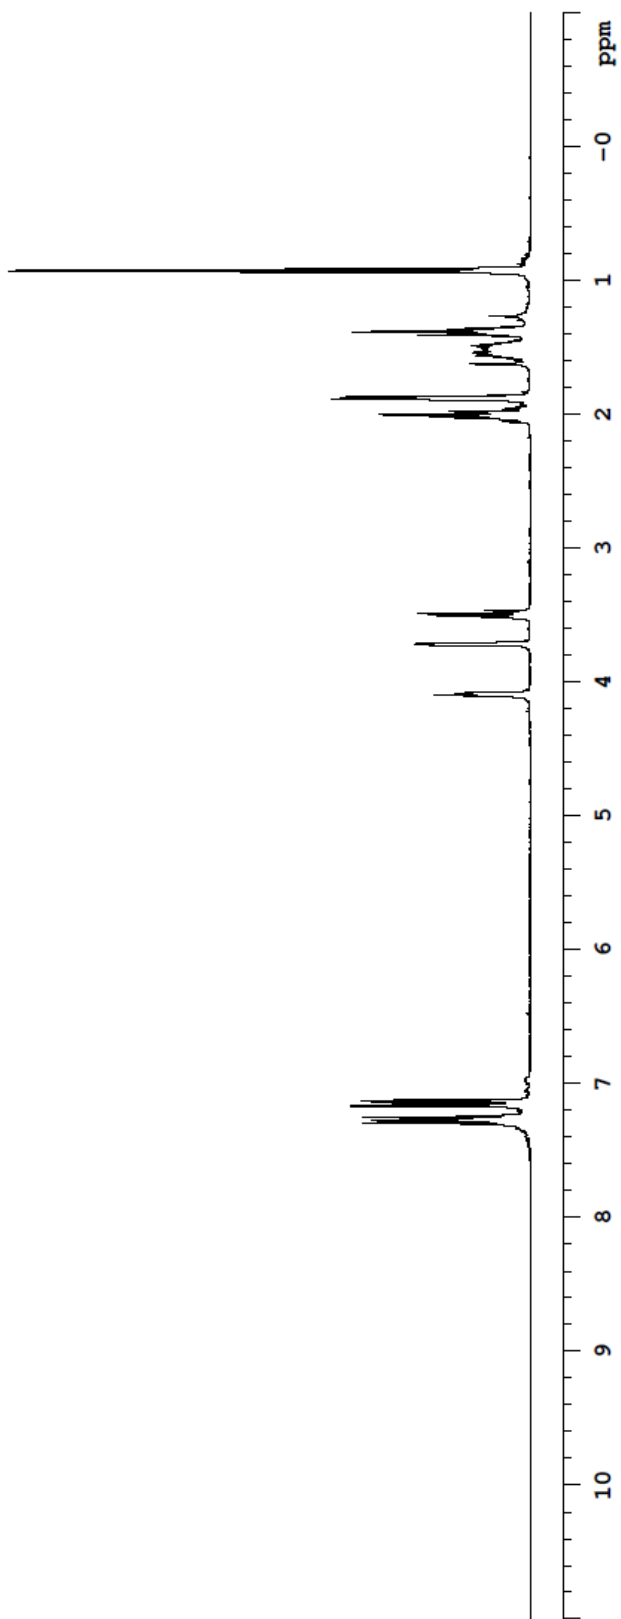

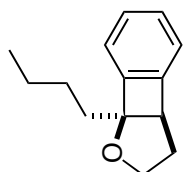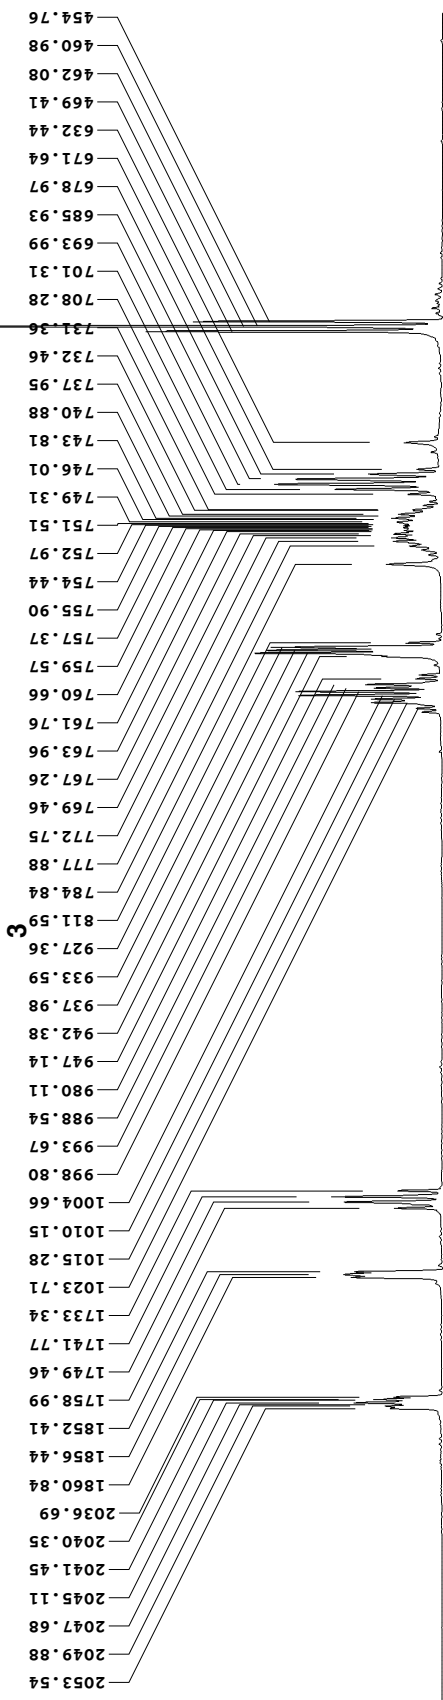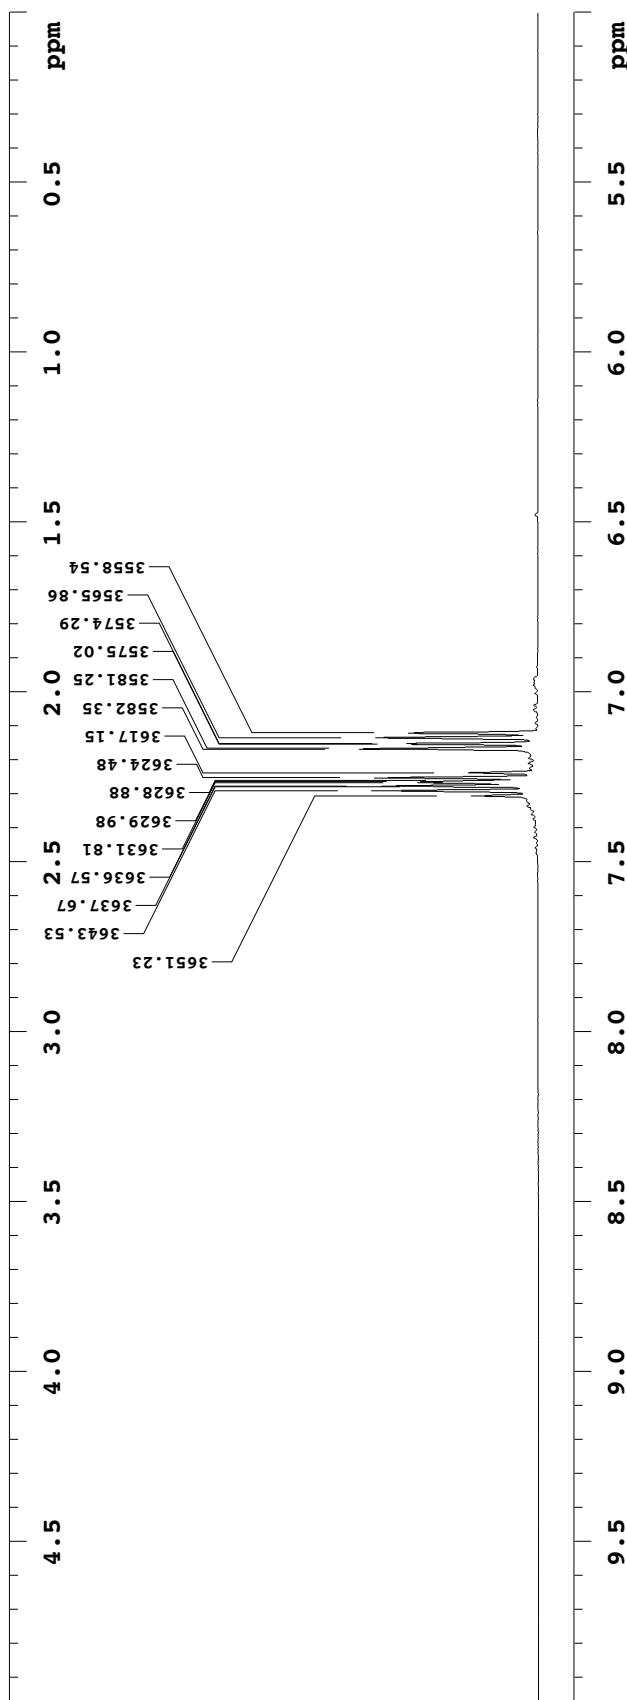

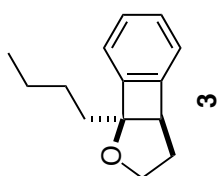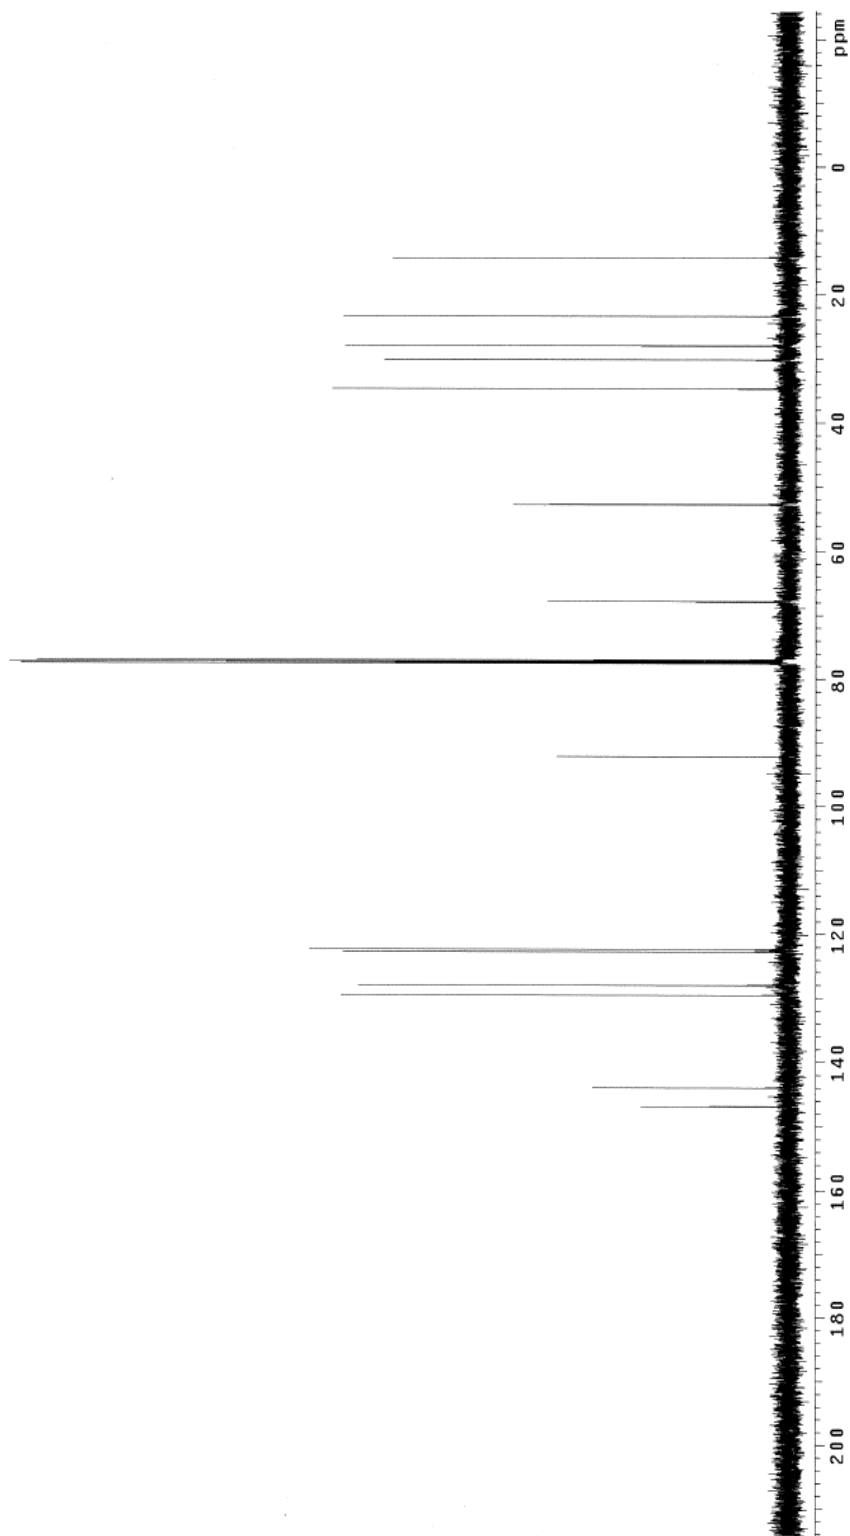

gCOSY spectrum of compound 3 in CDCl<sub>3</sub>

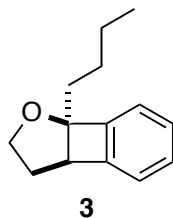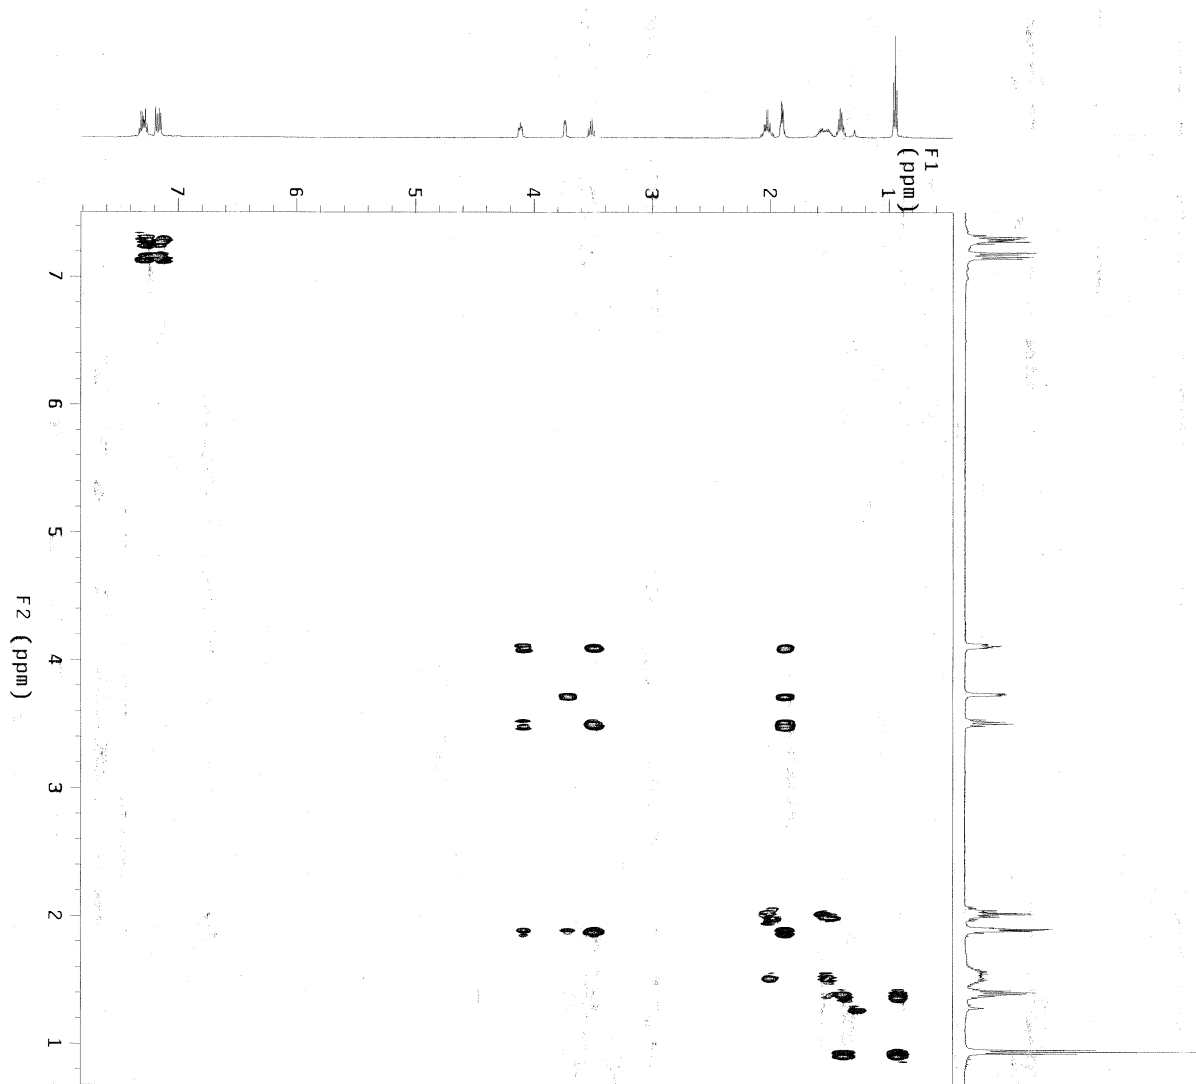

Expanded gCOSY spectrum of compound **3** in CDCl<sub>3</sub>

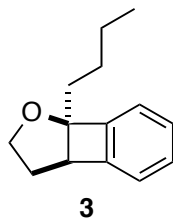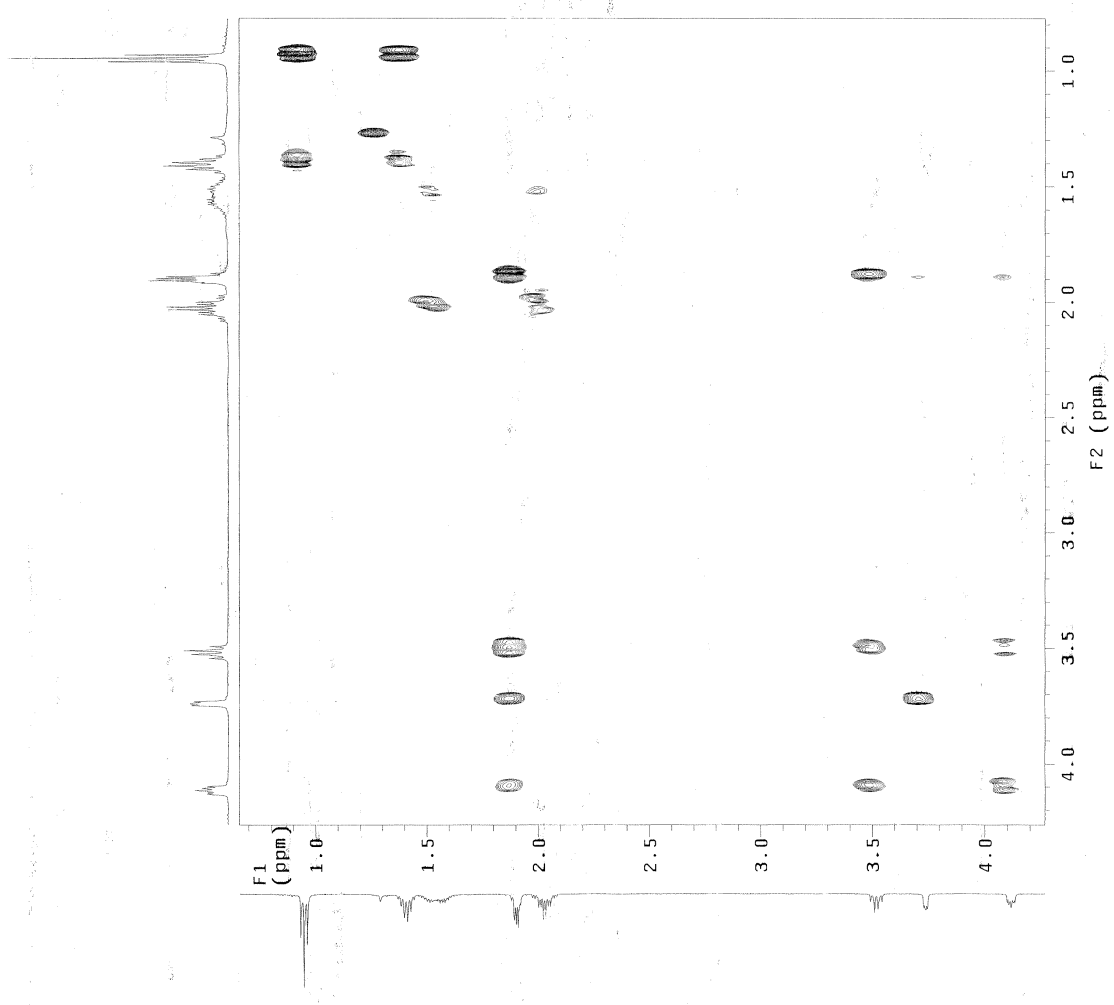

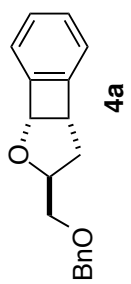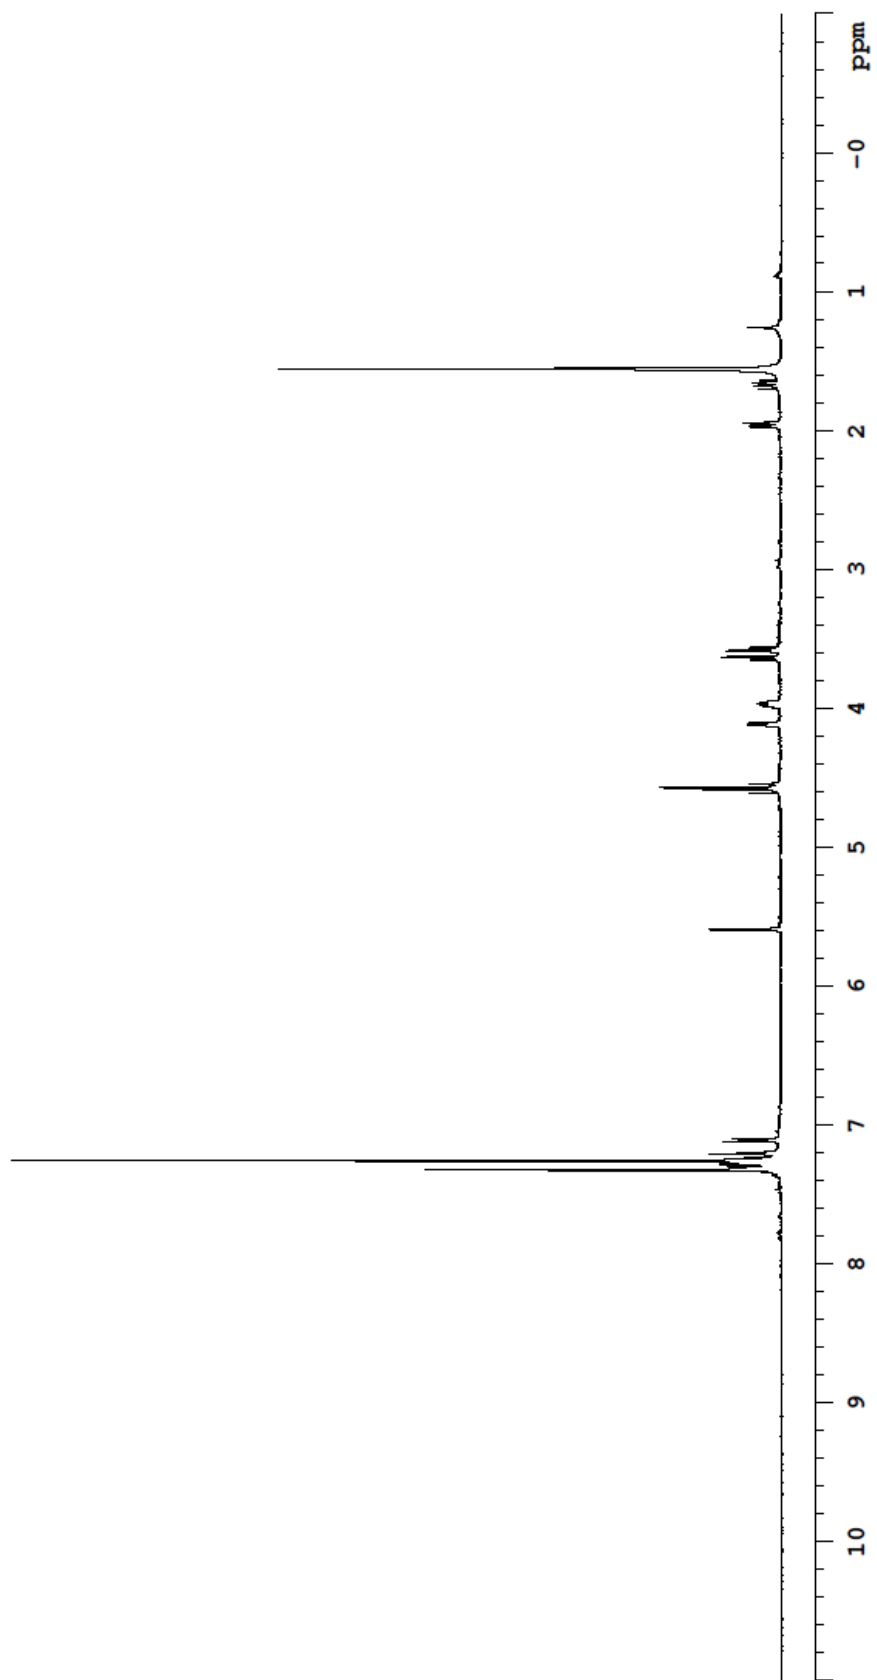

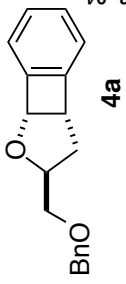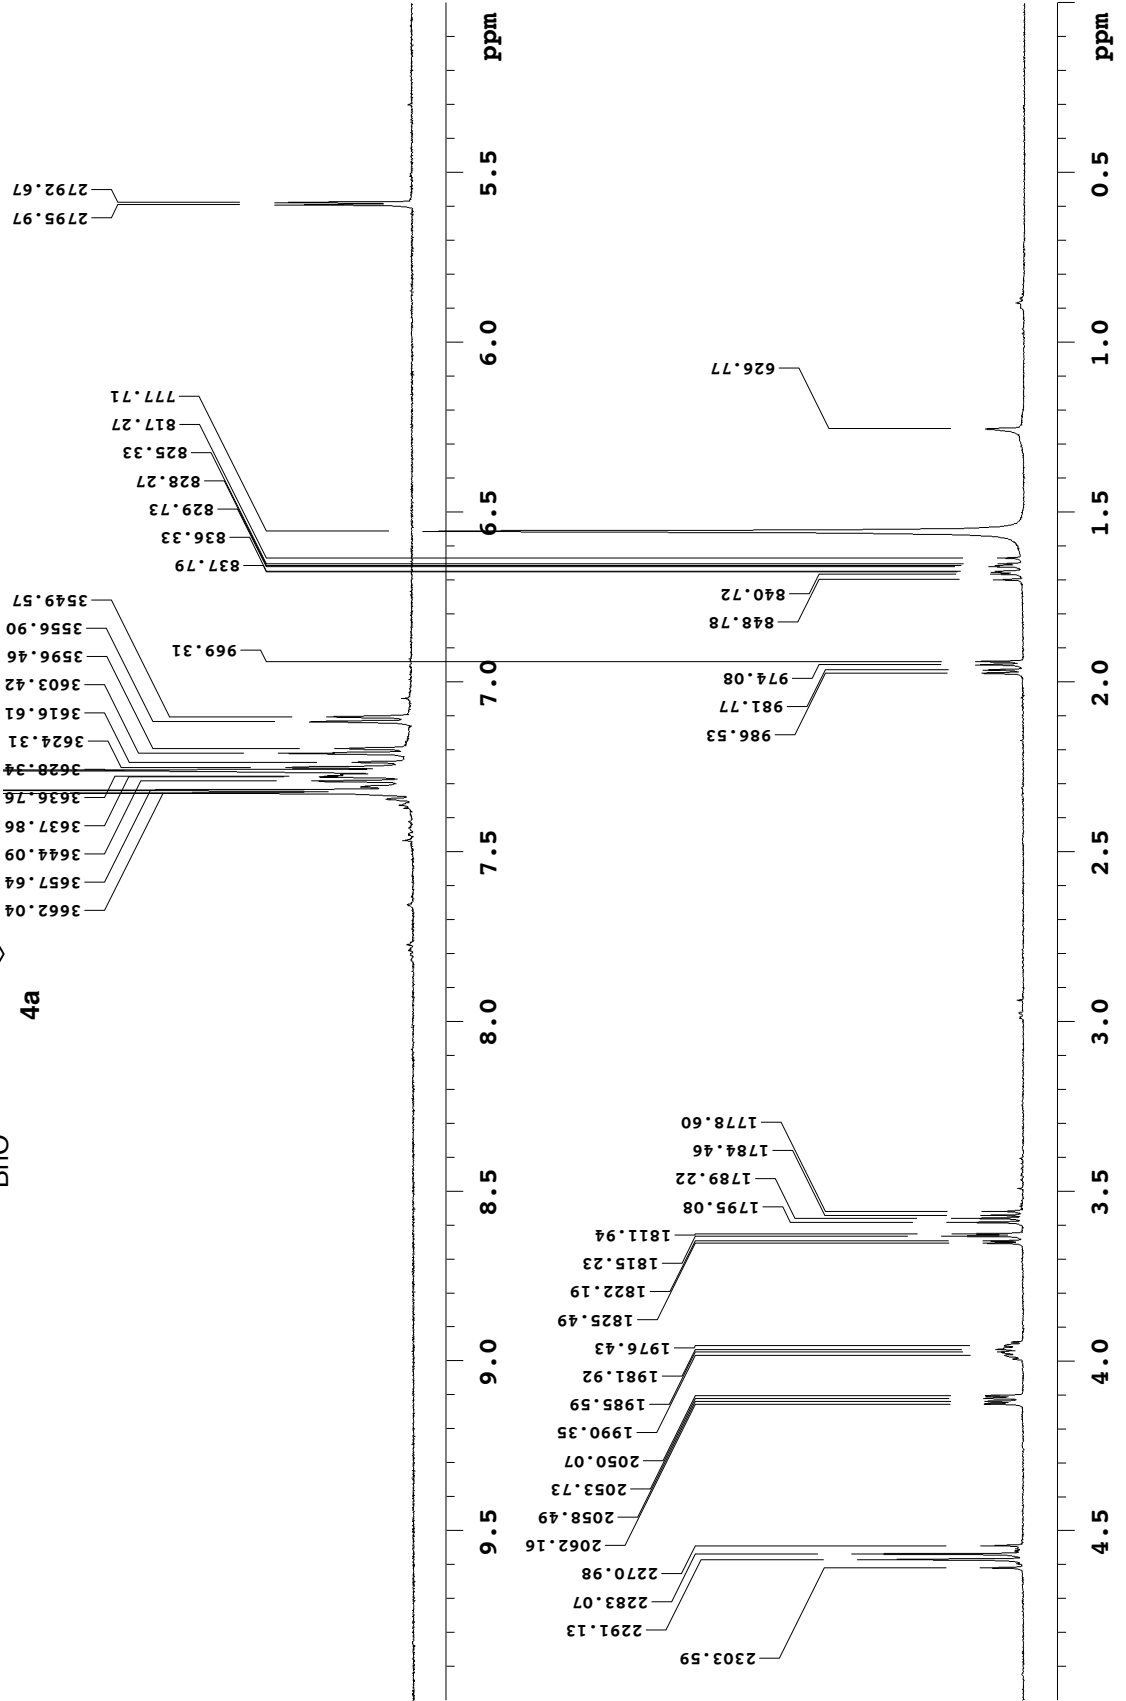



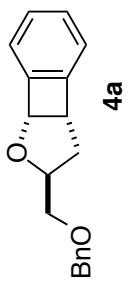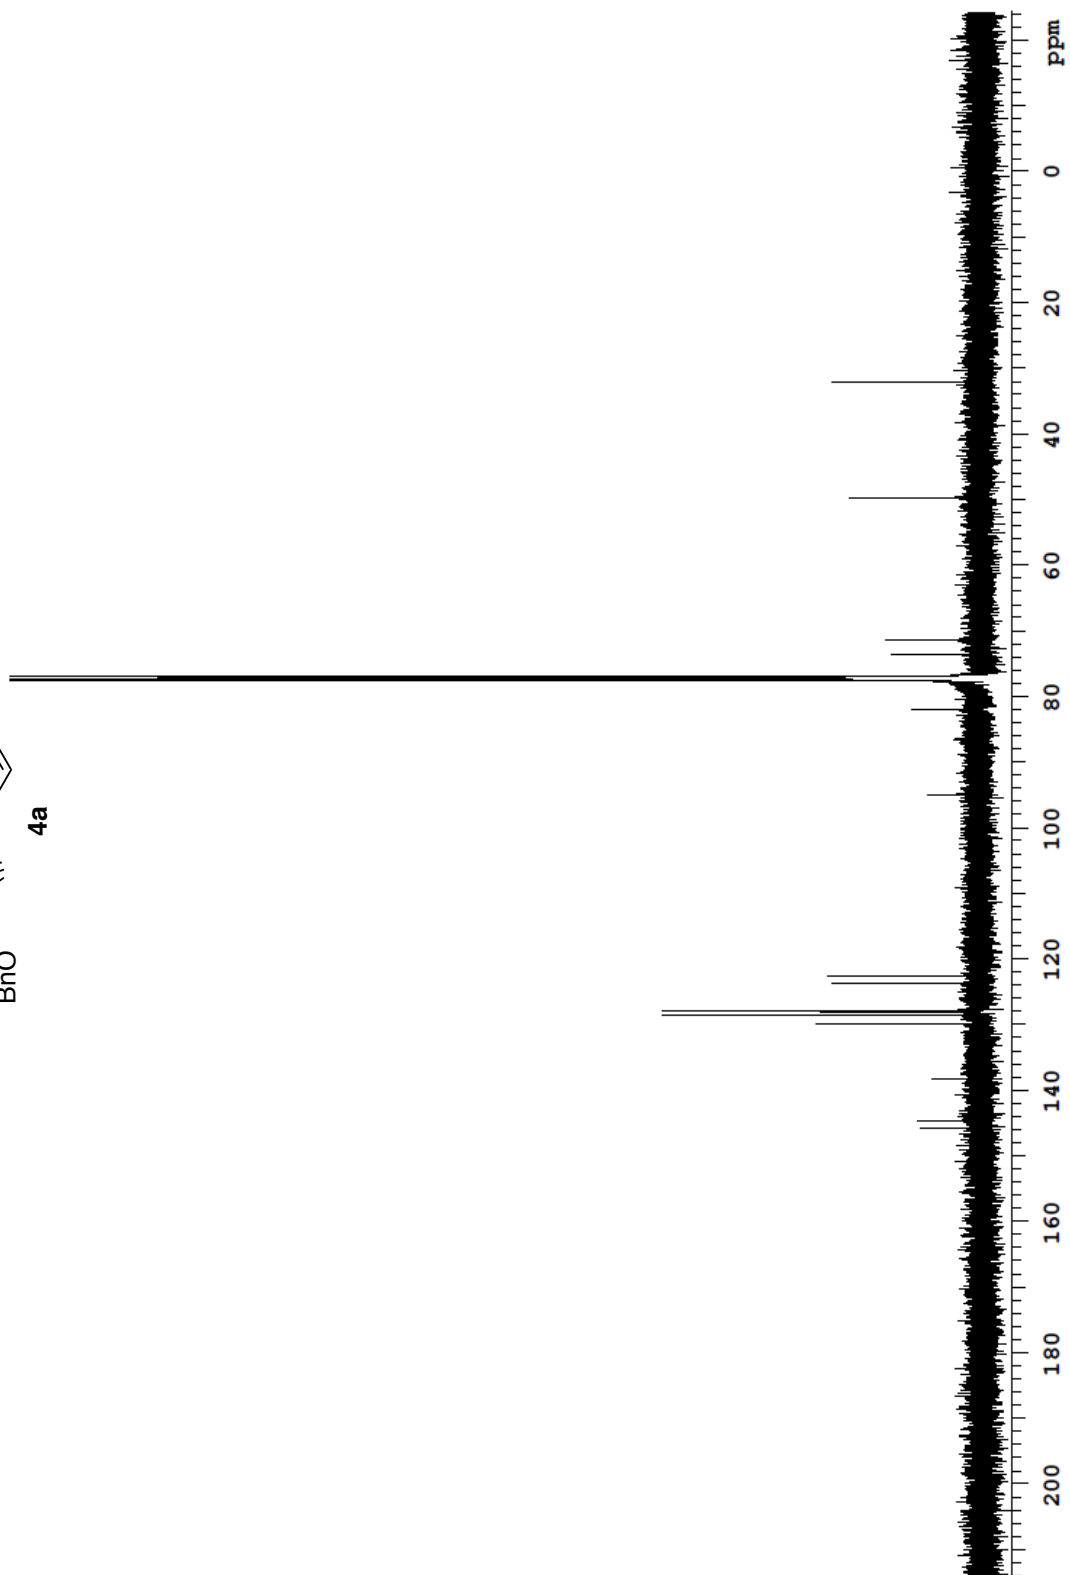

gCOSY spectrum of compound **4a** in CDCl<sub>3</sub>

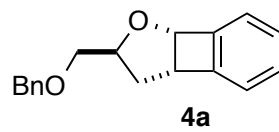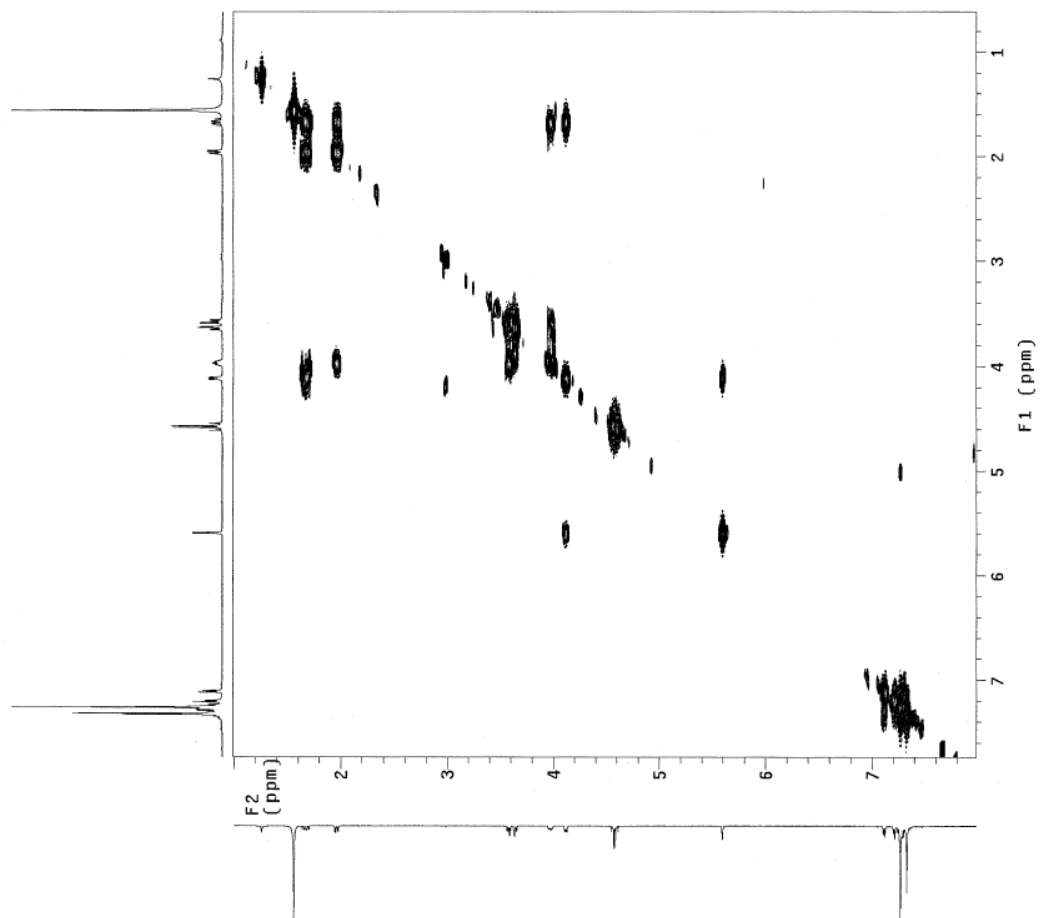

NOESY spectrum of compound **4a** in CDCl<sub>3</sub>

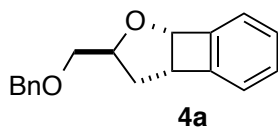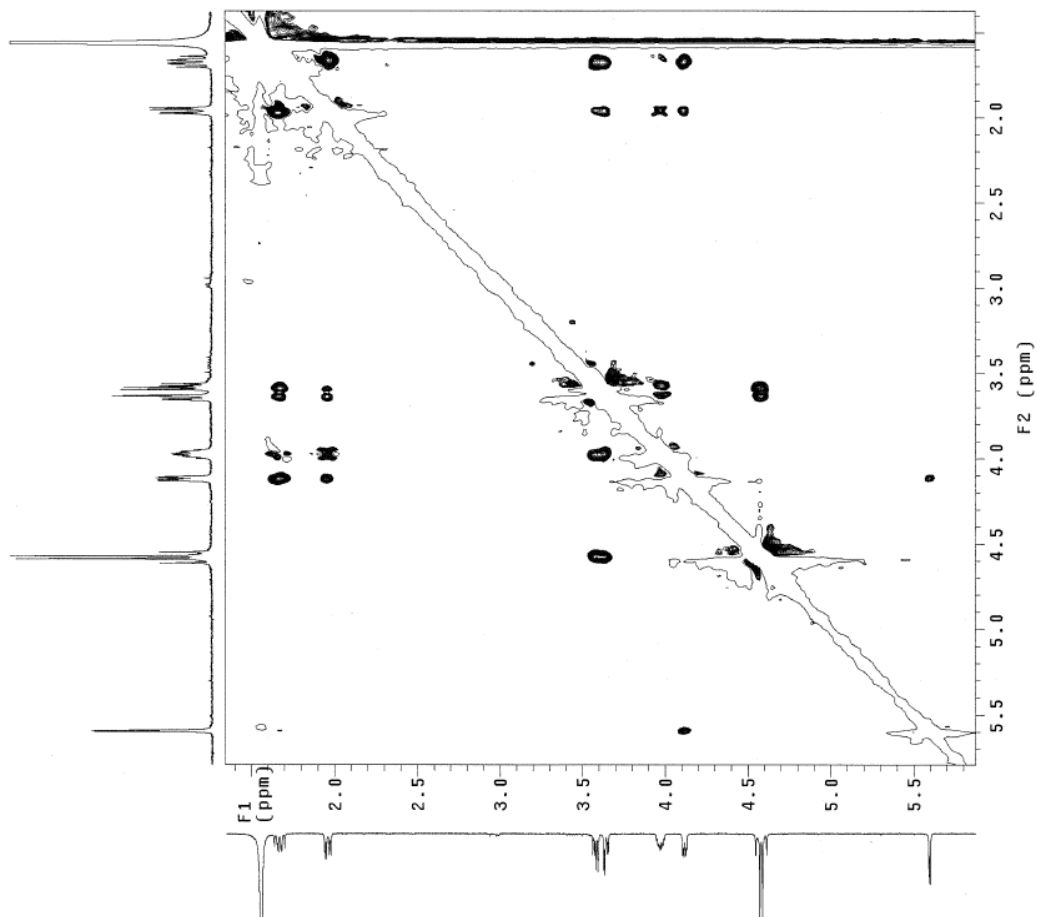

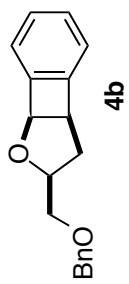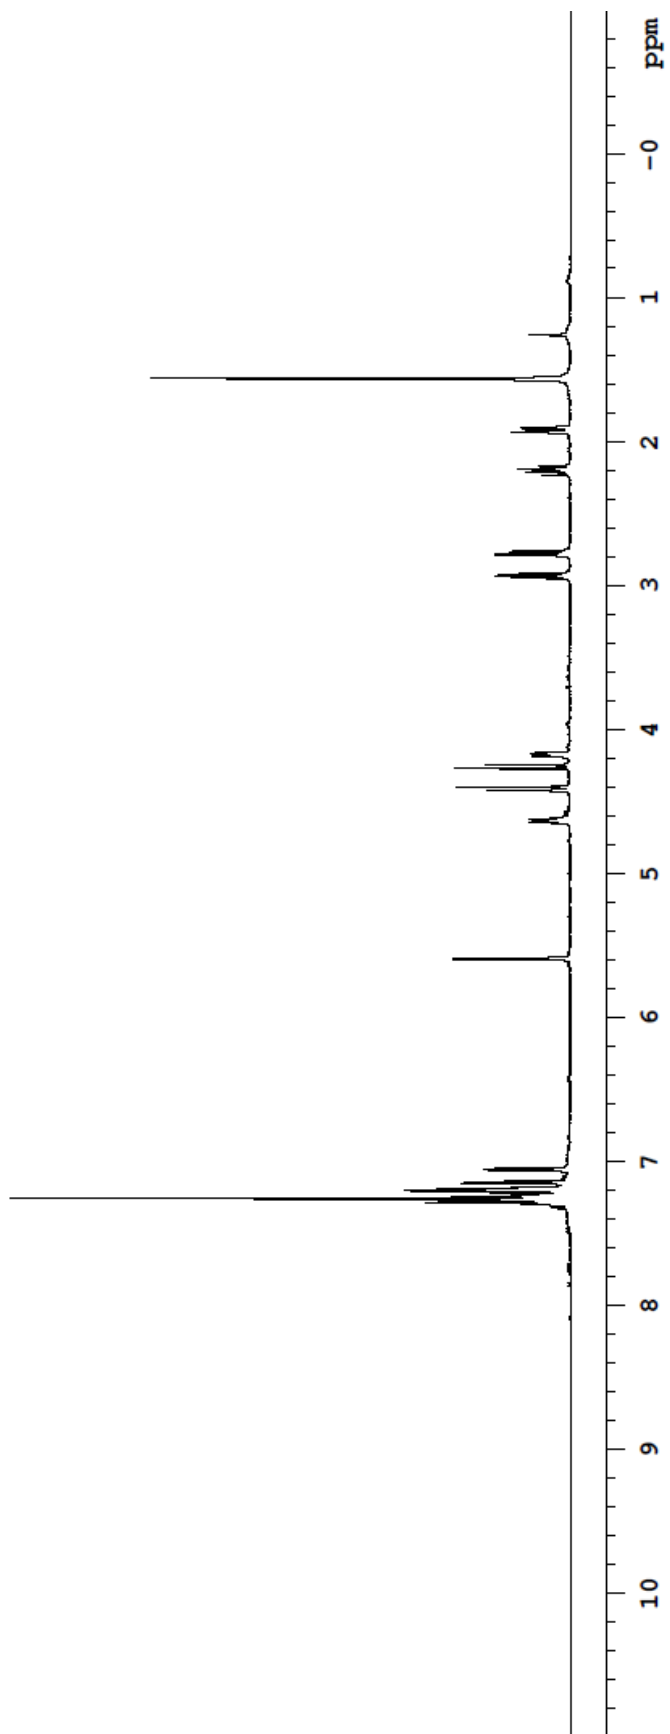

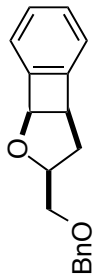

4b

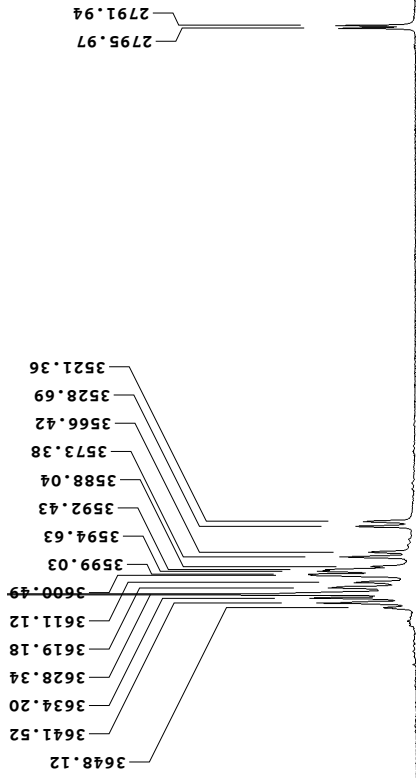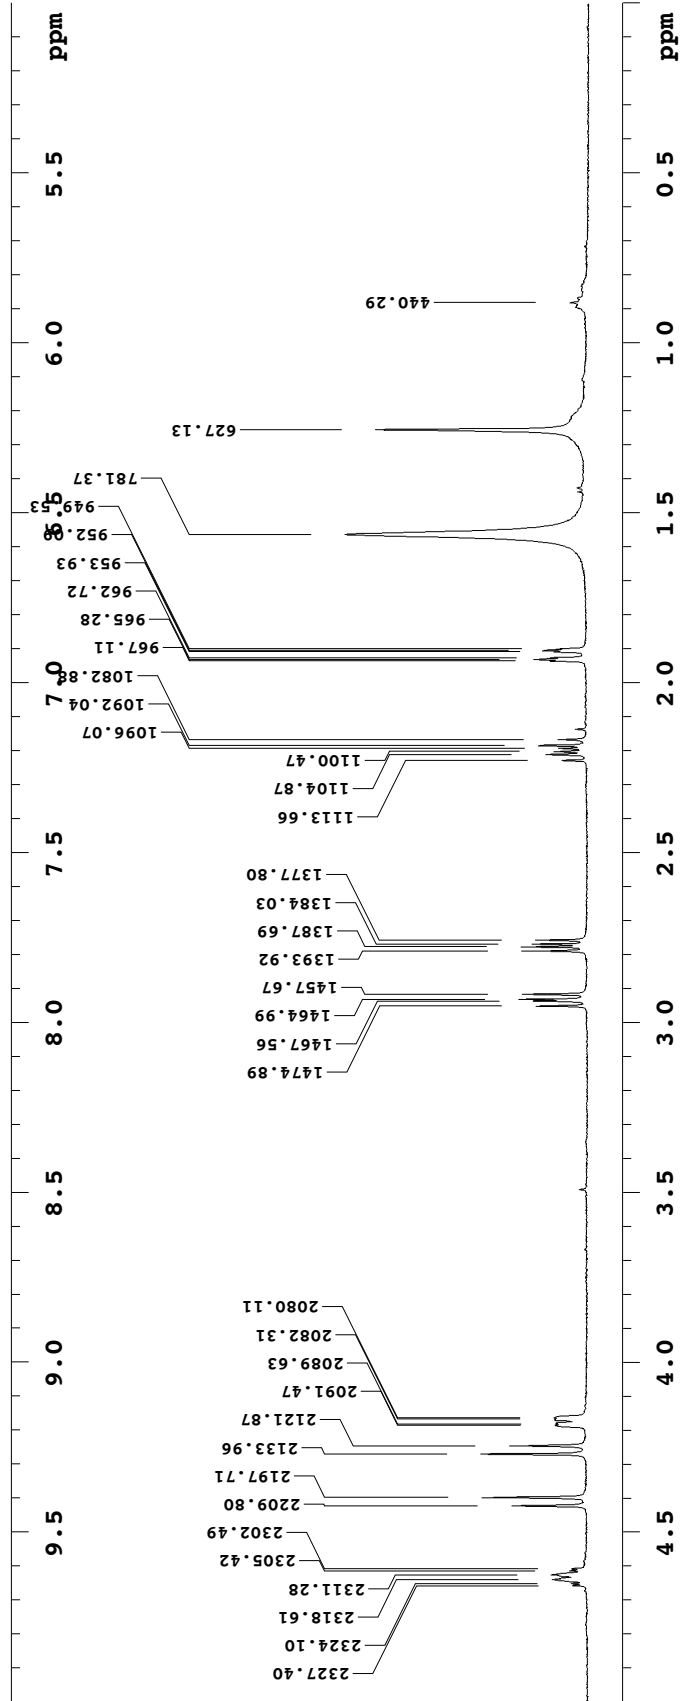

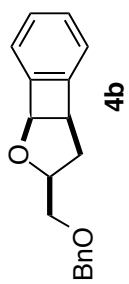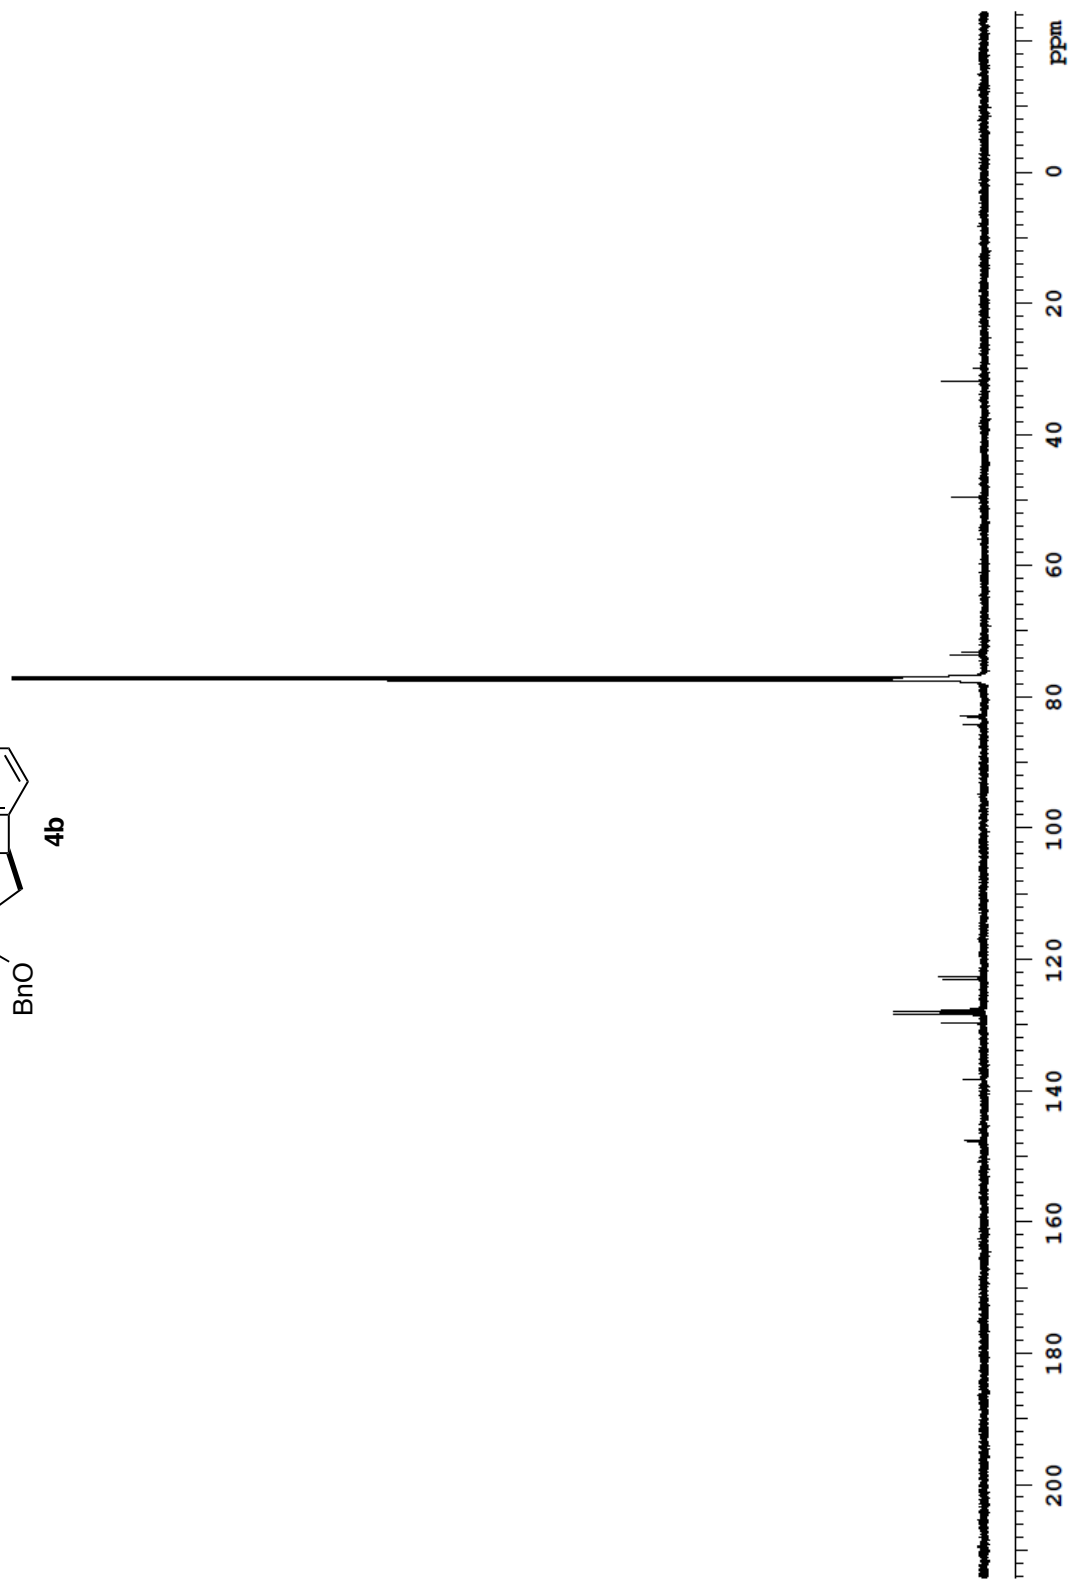

gCOSY spectrum of compound **4b** in CDCl<sub>3</sub>

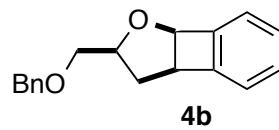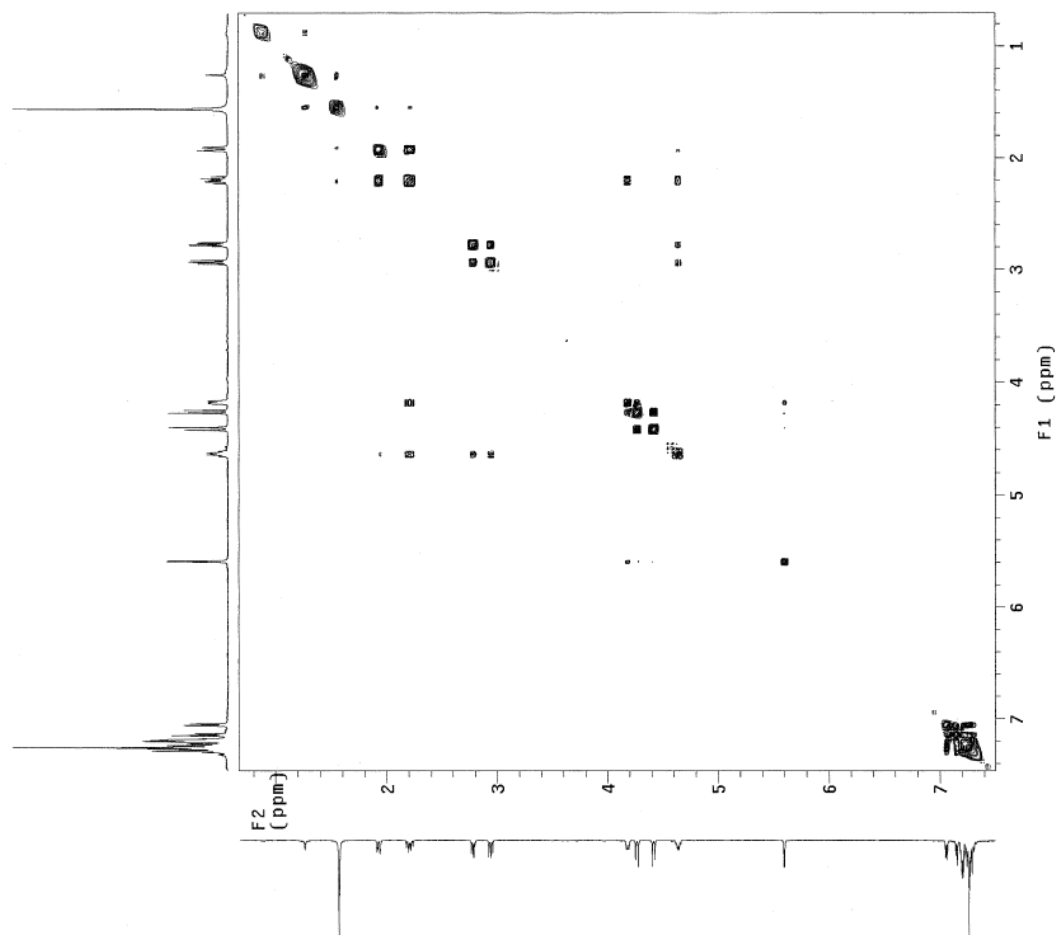

NOESY spectrum of compound **4b** in CDCl<sub>3</sub>

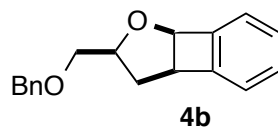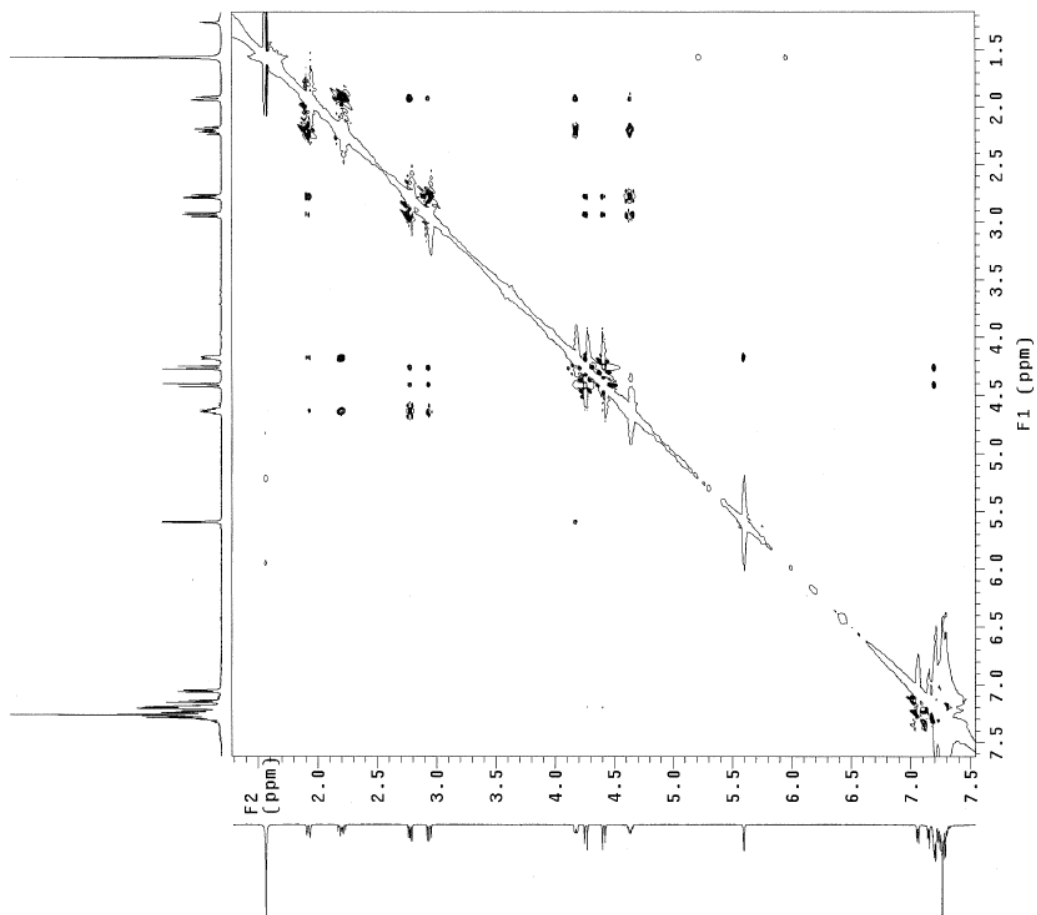



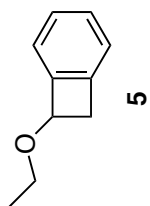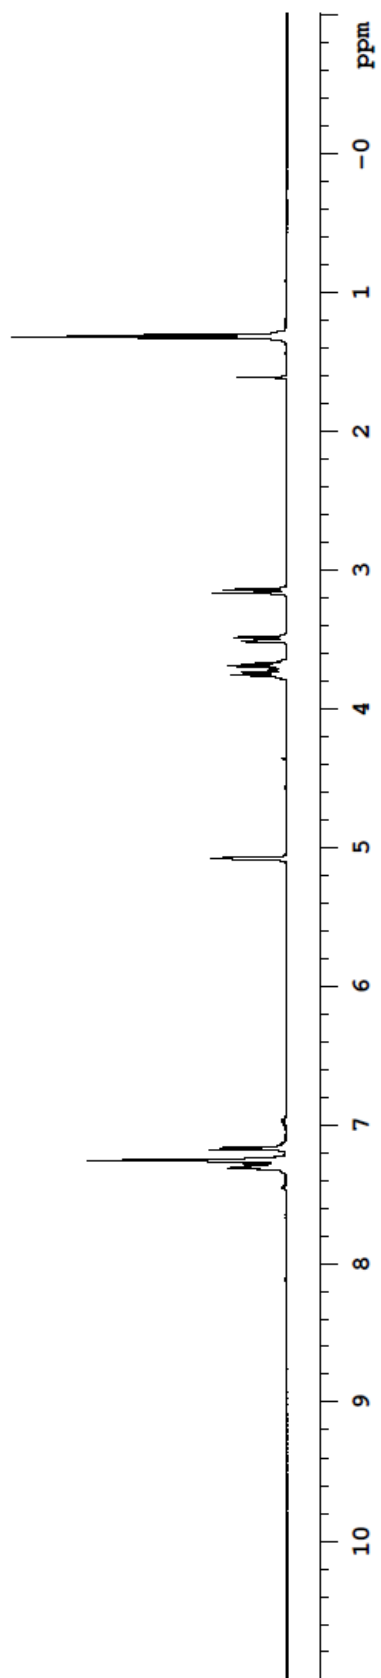

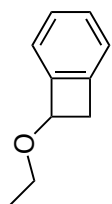

5

1882.21  
1875.38  
1873.42  
1868.05  
1866.59  
1848.52  
1841.20  
1834.36  
1832.41  
1756.24  
1751.84  
1742.08  
1737.68  
1582.41  
1568.25

663.95  
657.12  
649.79

804.09

3638.07  
3626.35

3660.05  
3653.21  
3646.37  
3644.42

3620.49  
3585.34  
3578.01

2539.93  
2537.97  
2536.02

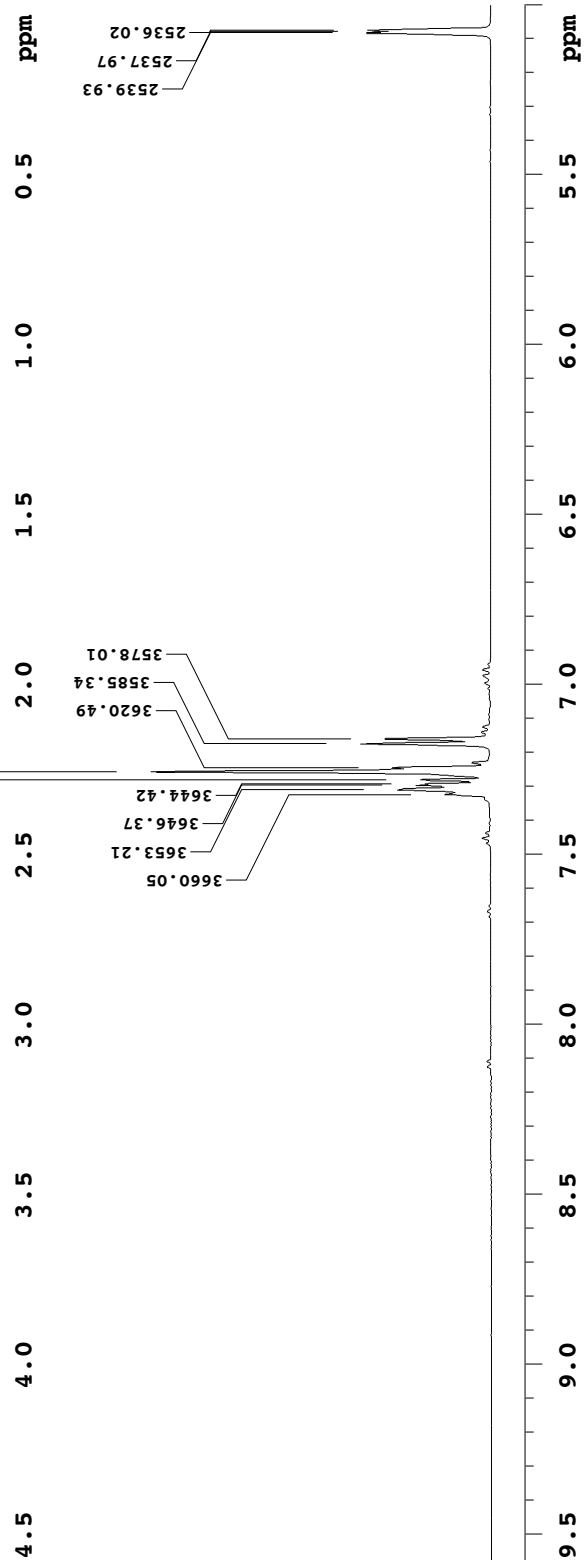

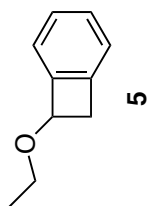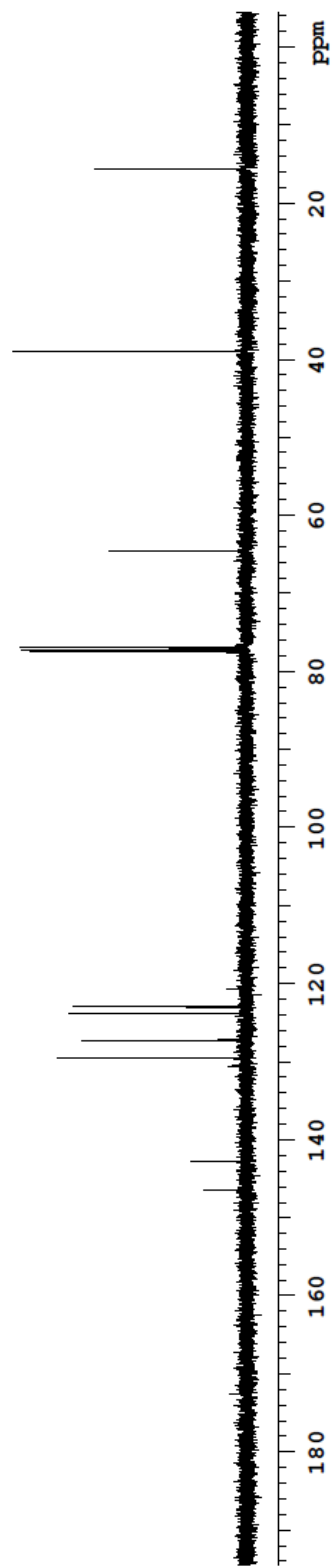

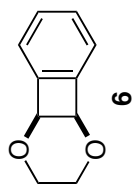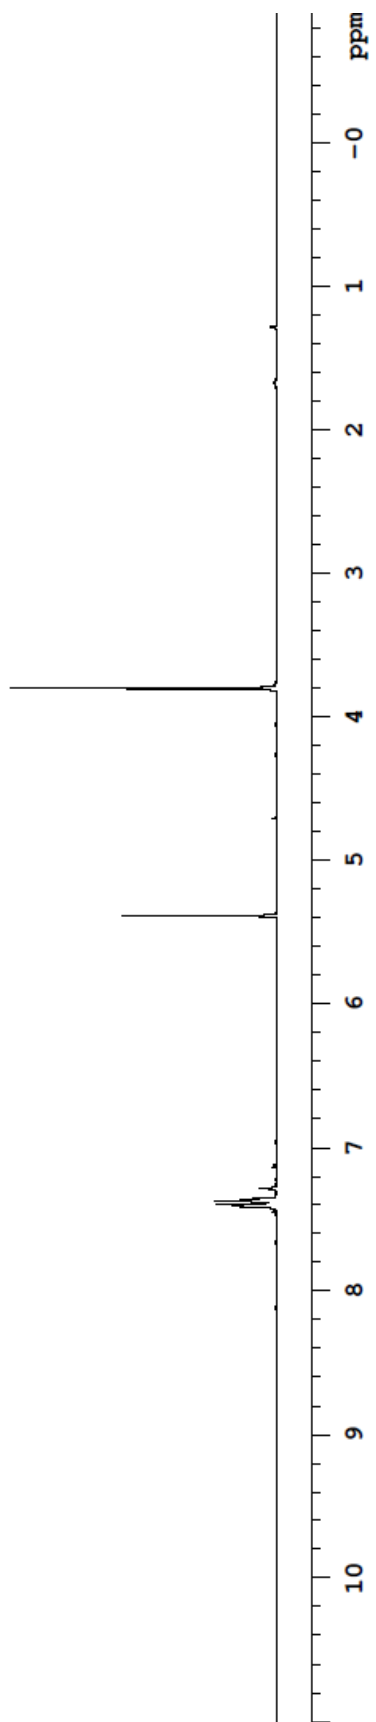

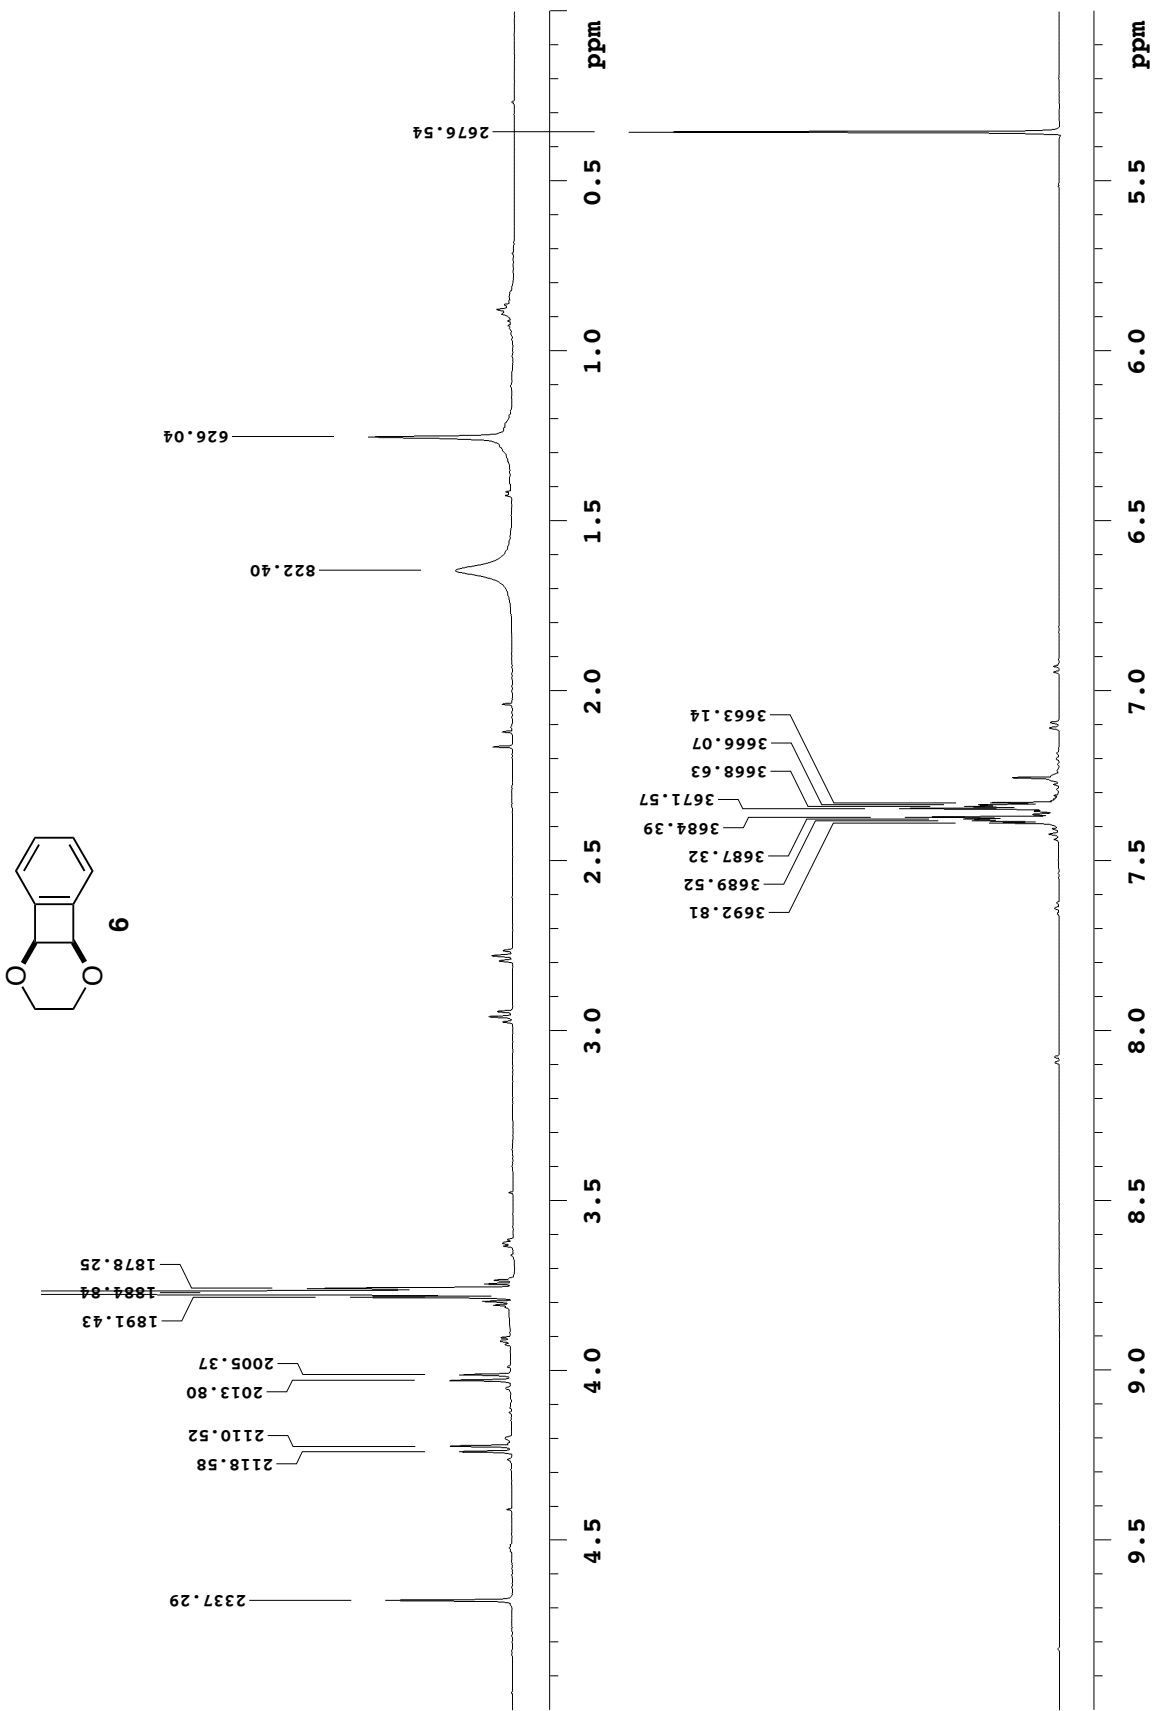

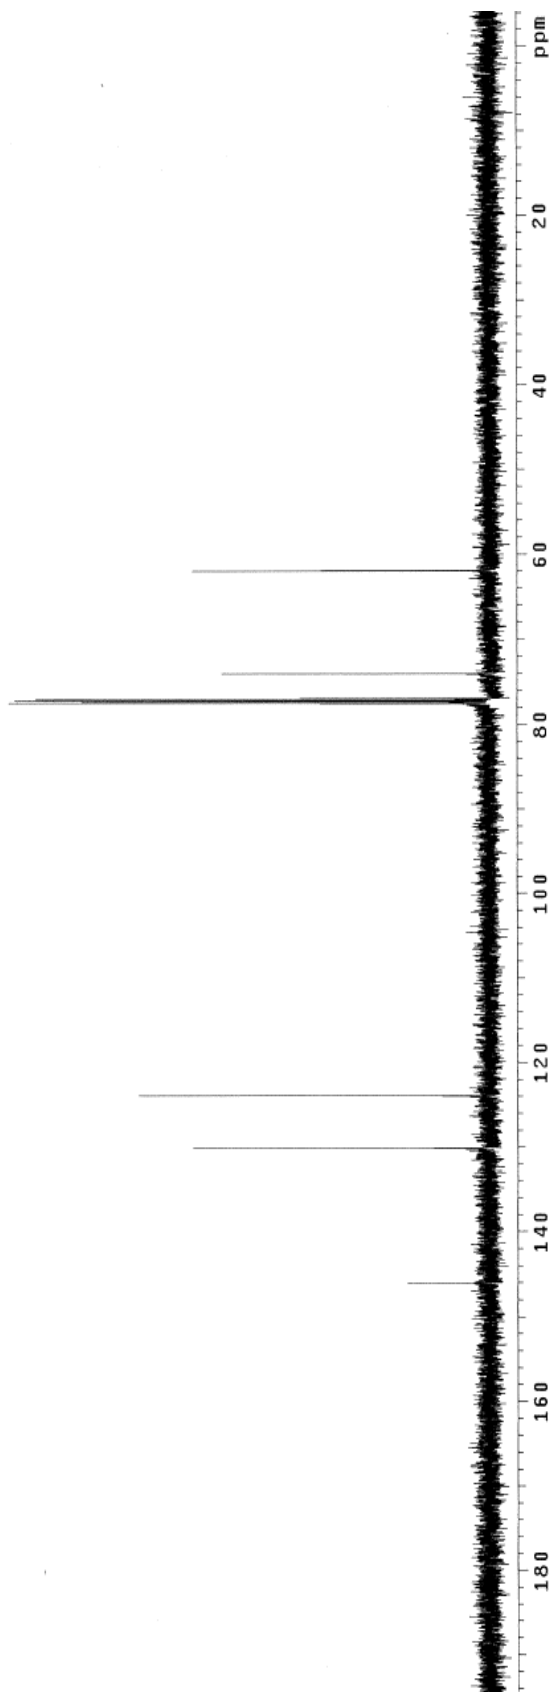

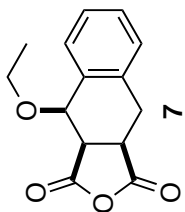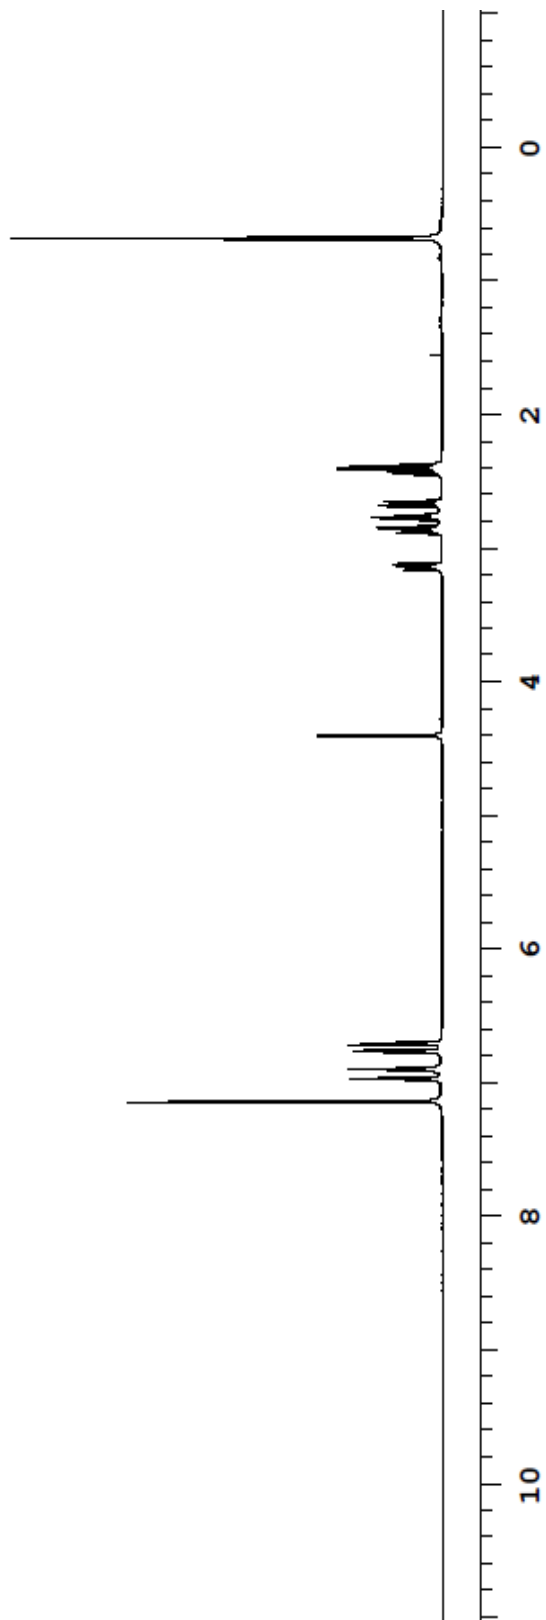

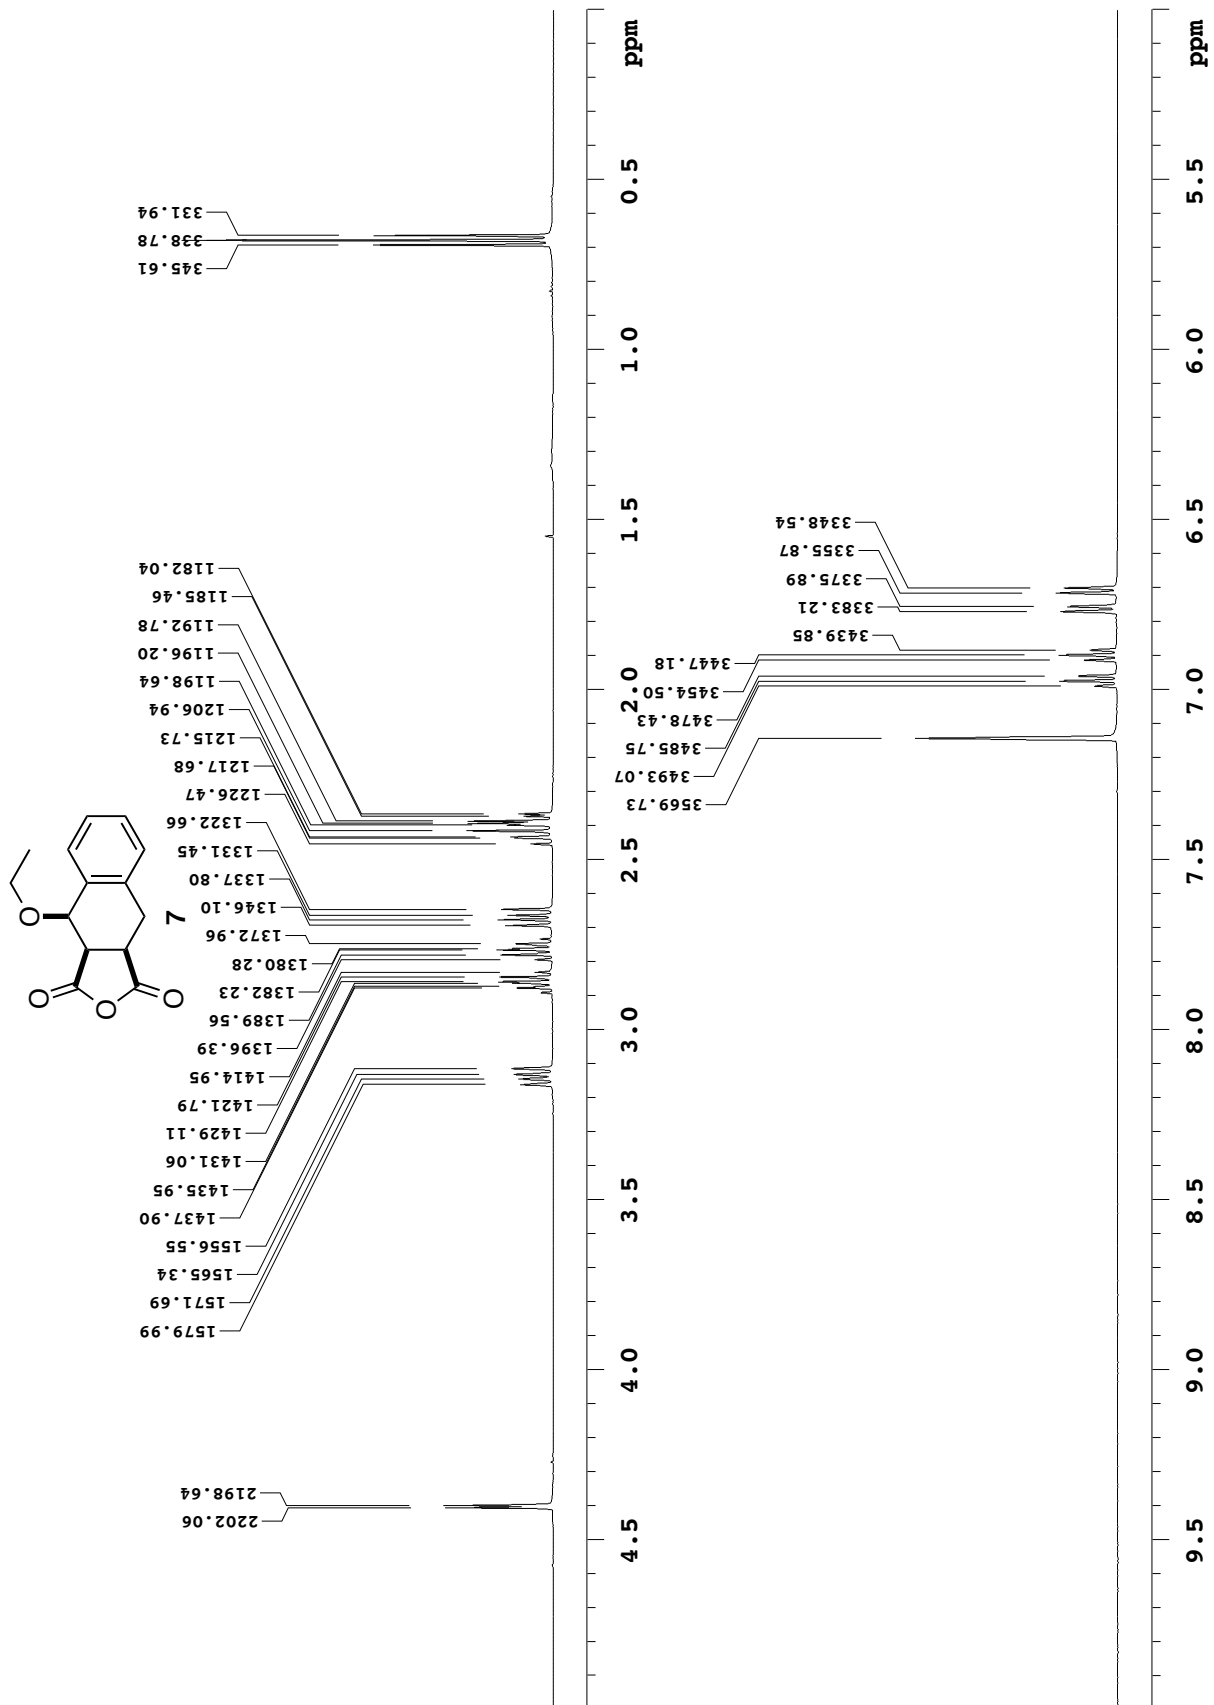



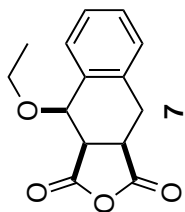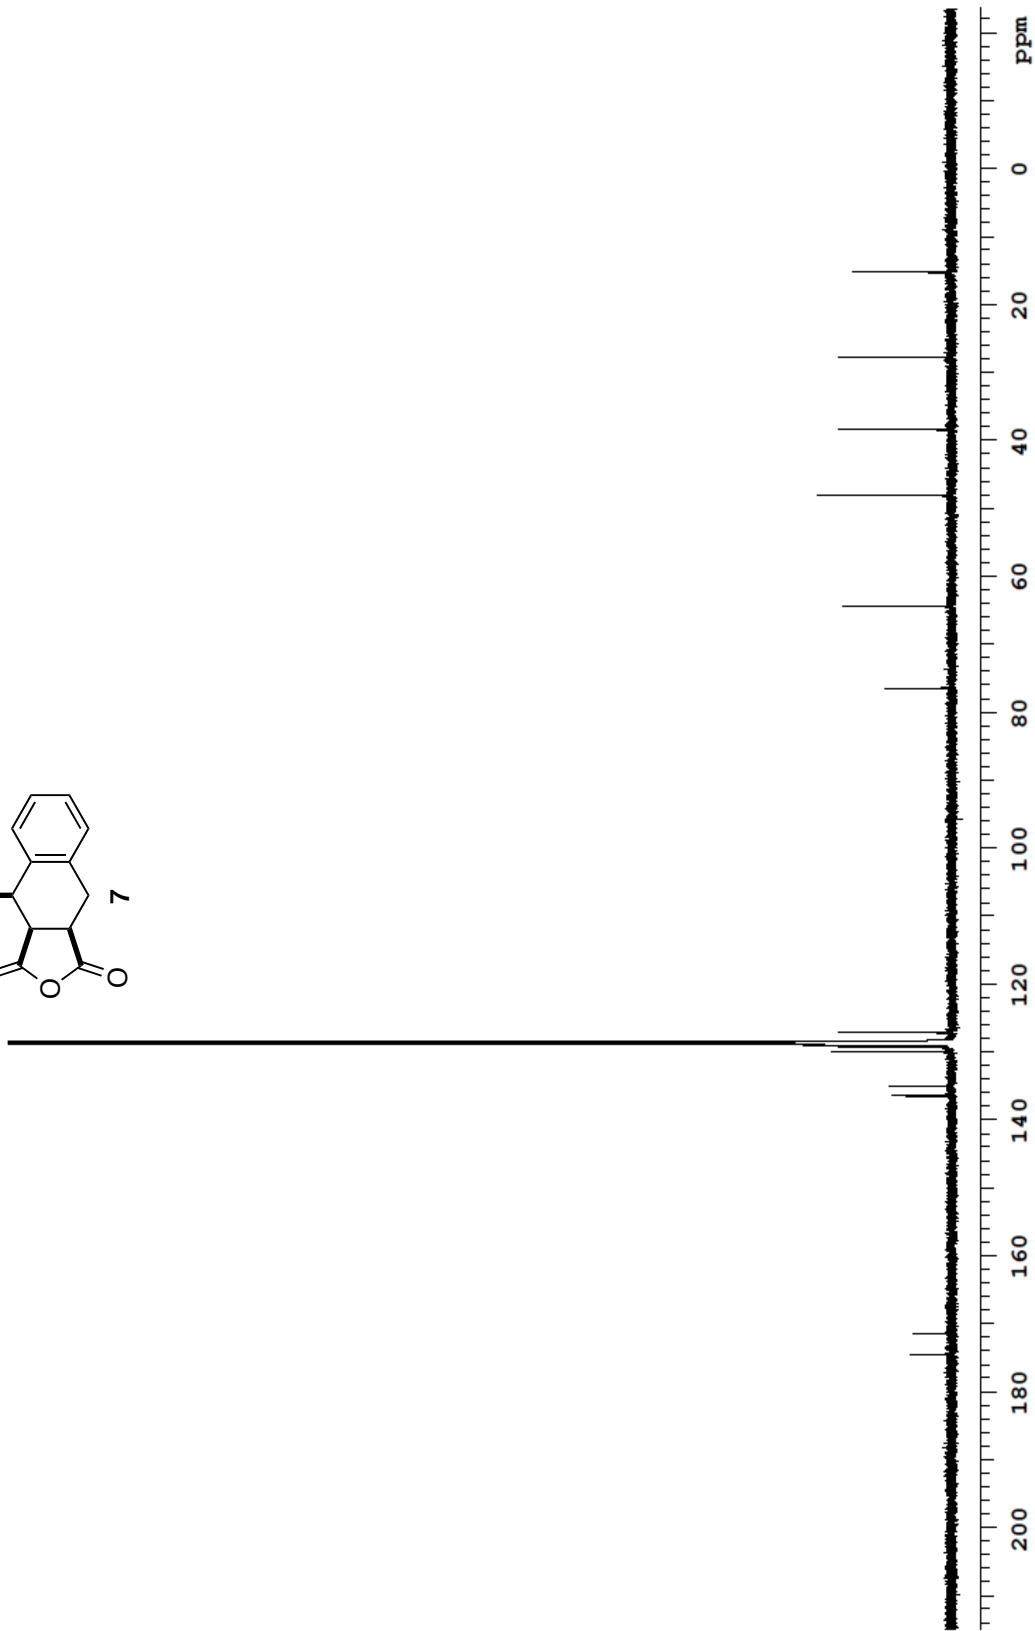

gCOSY spectrum of compound 7 in C<sub>6</sub>D<sub>6</sub>

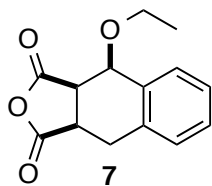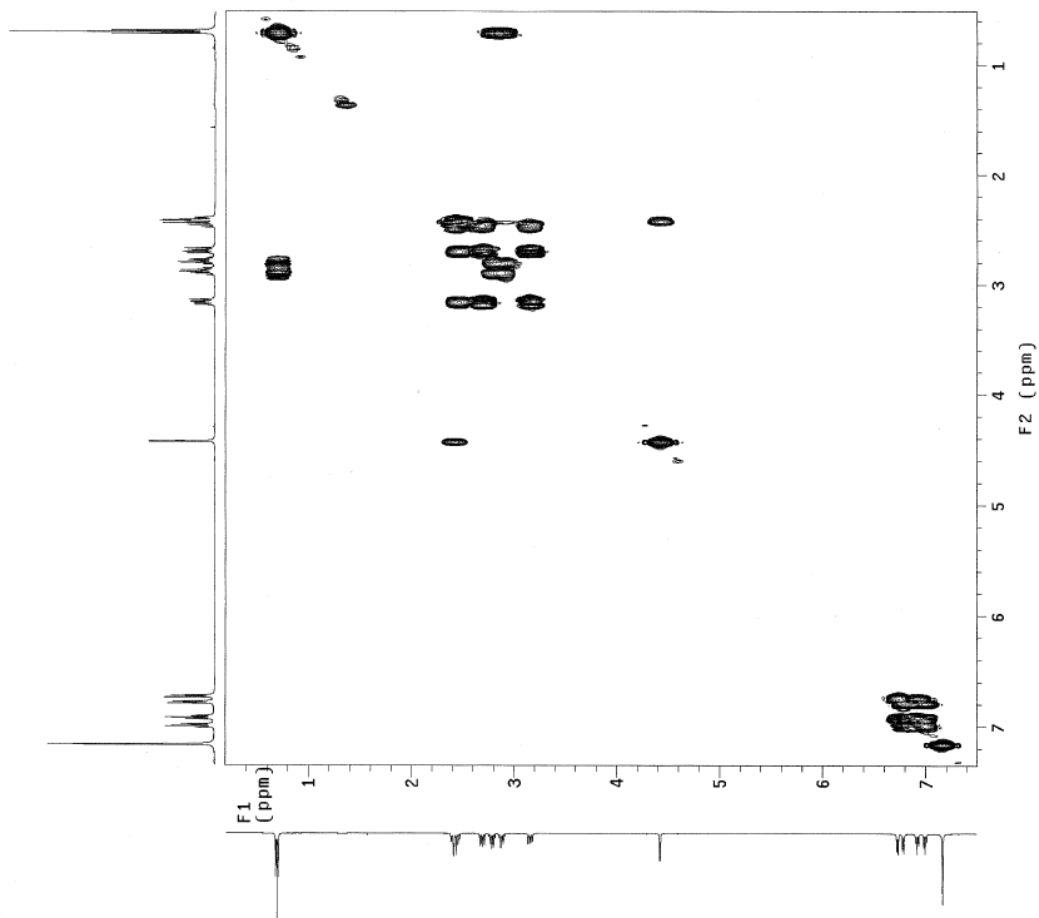

NOESY spectrum of compound **7** in C<sub>6</sub>D<sub>6</sub>

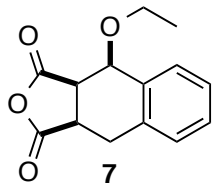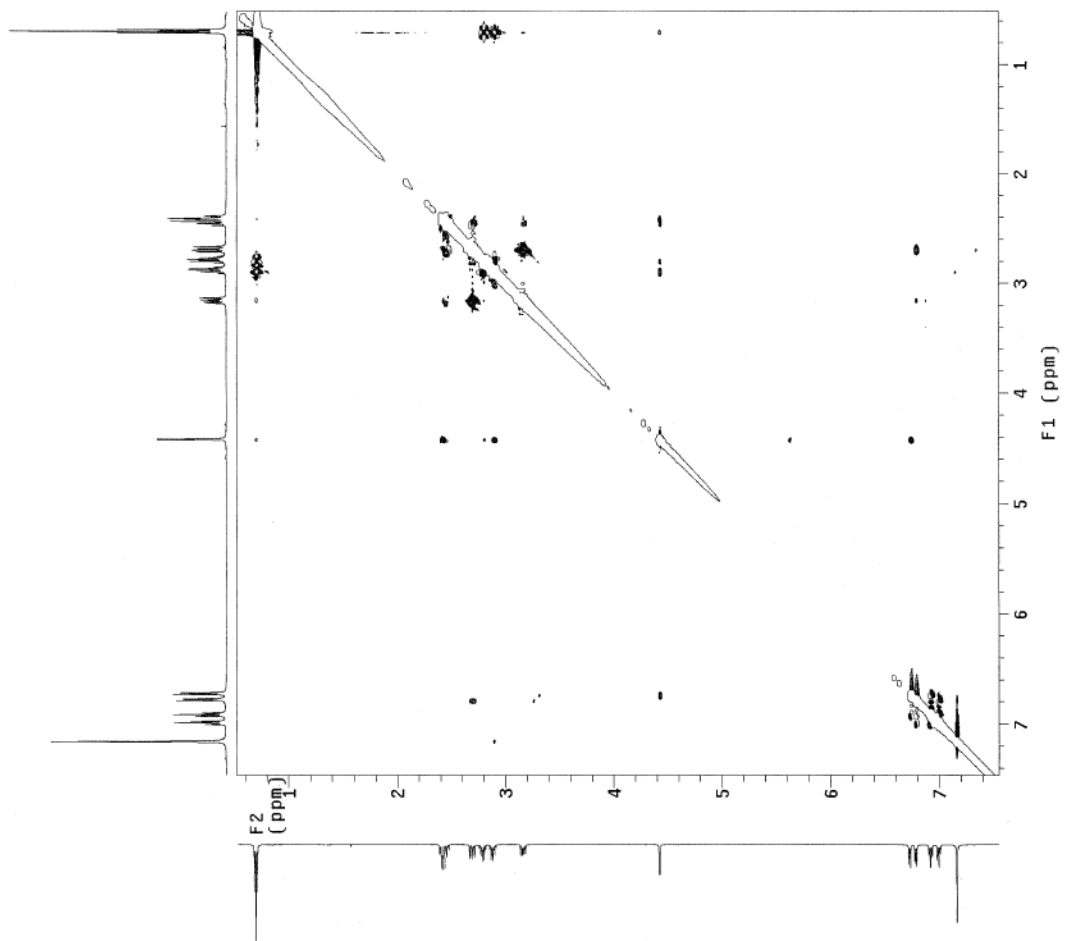

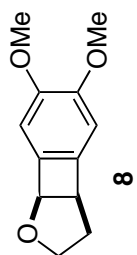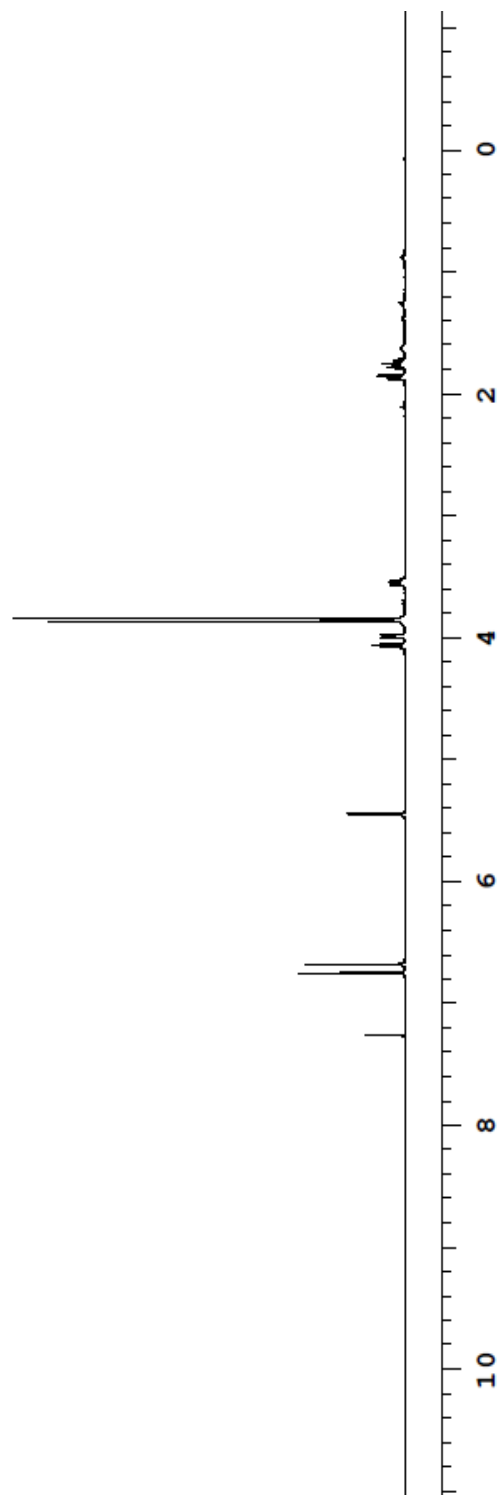

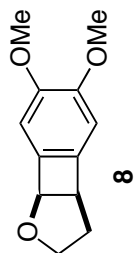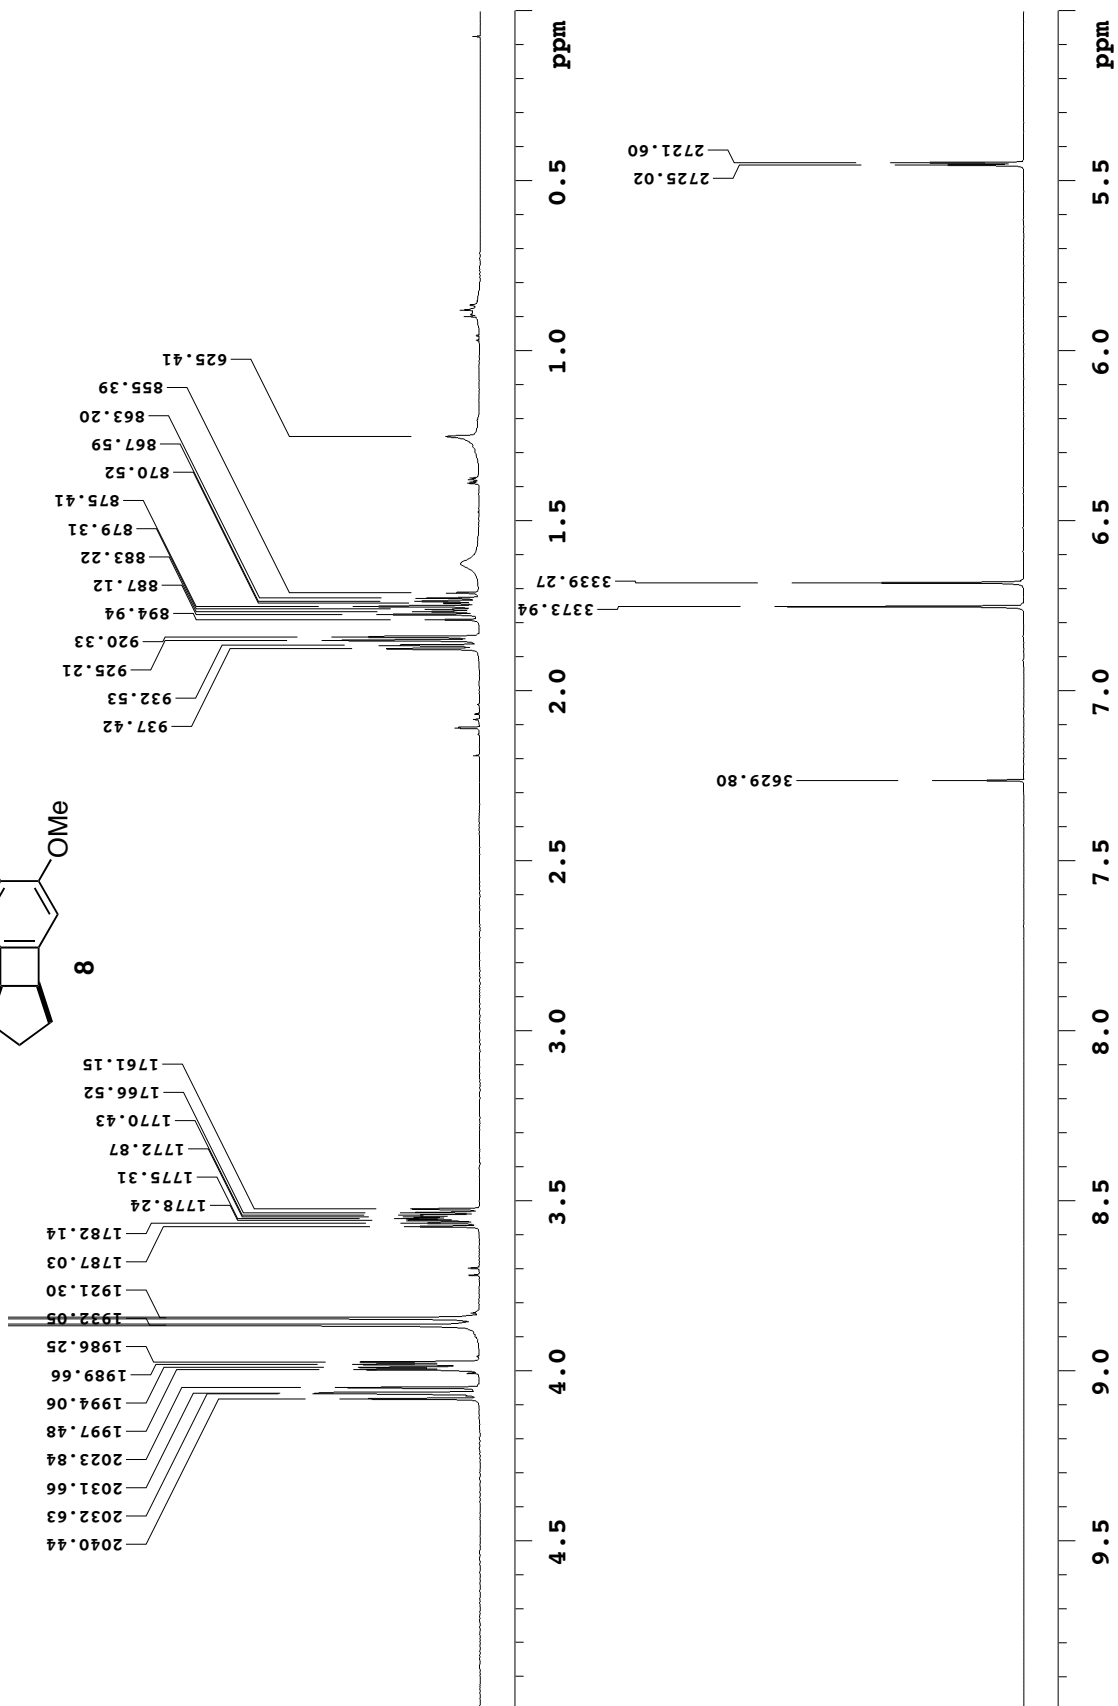

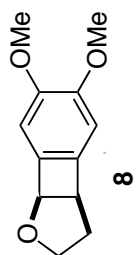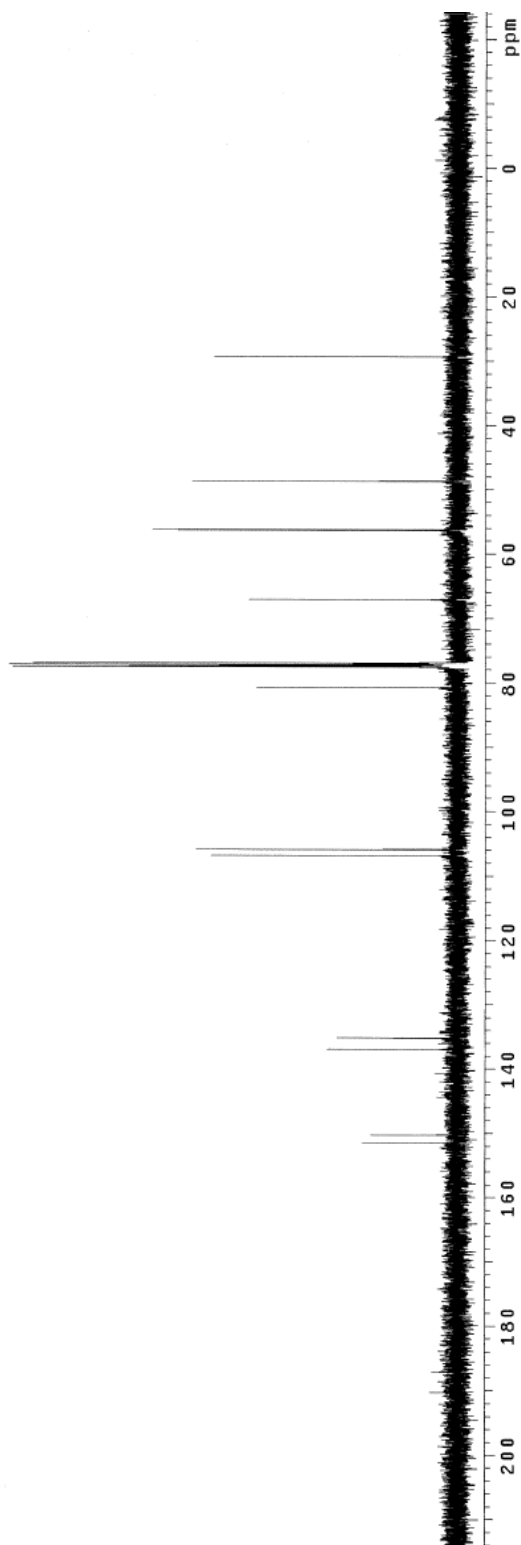

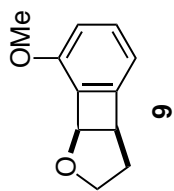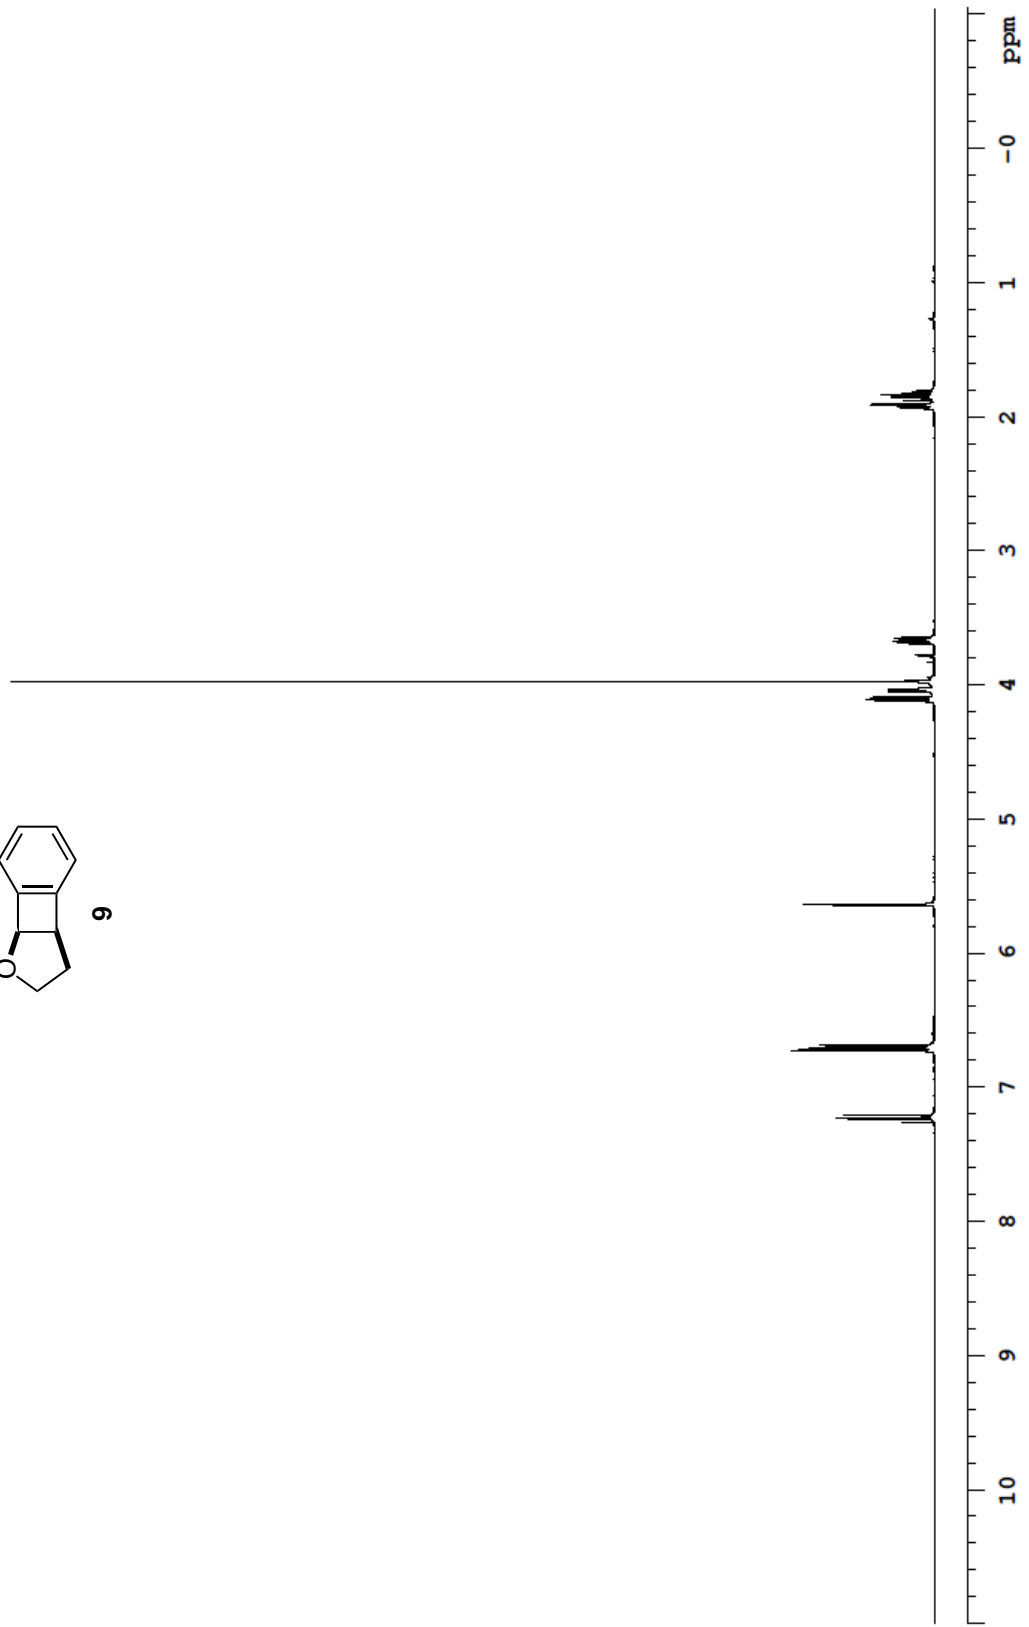

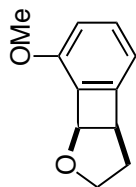

**6**

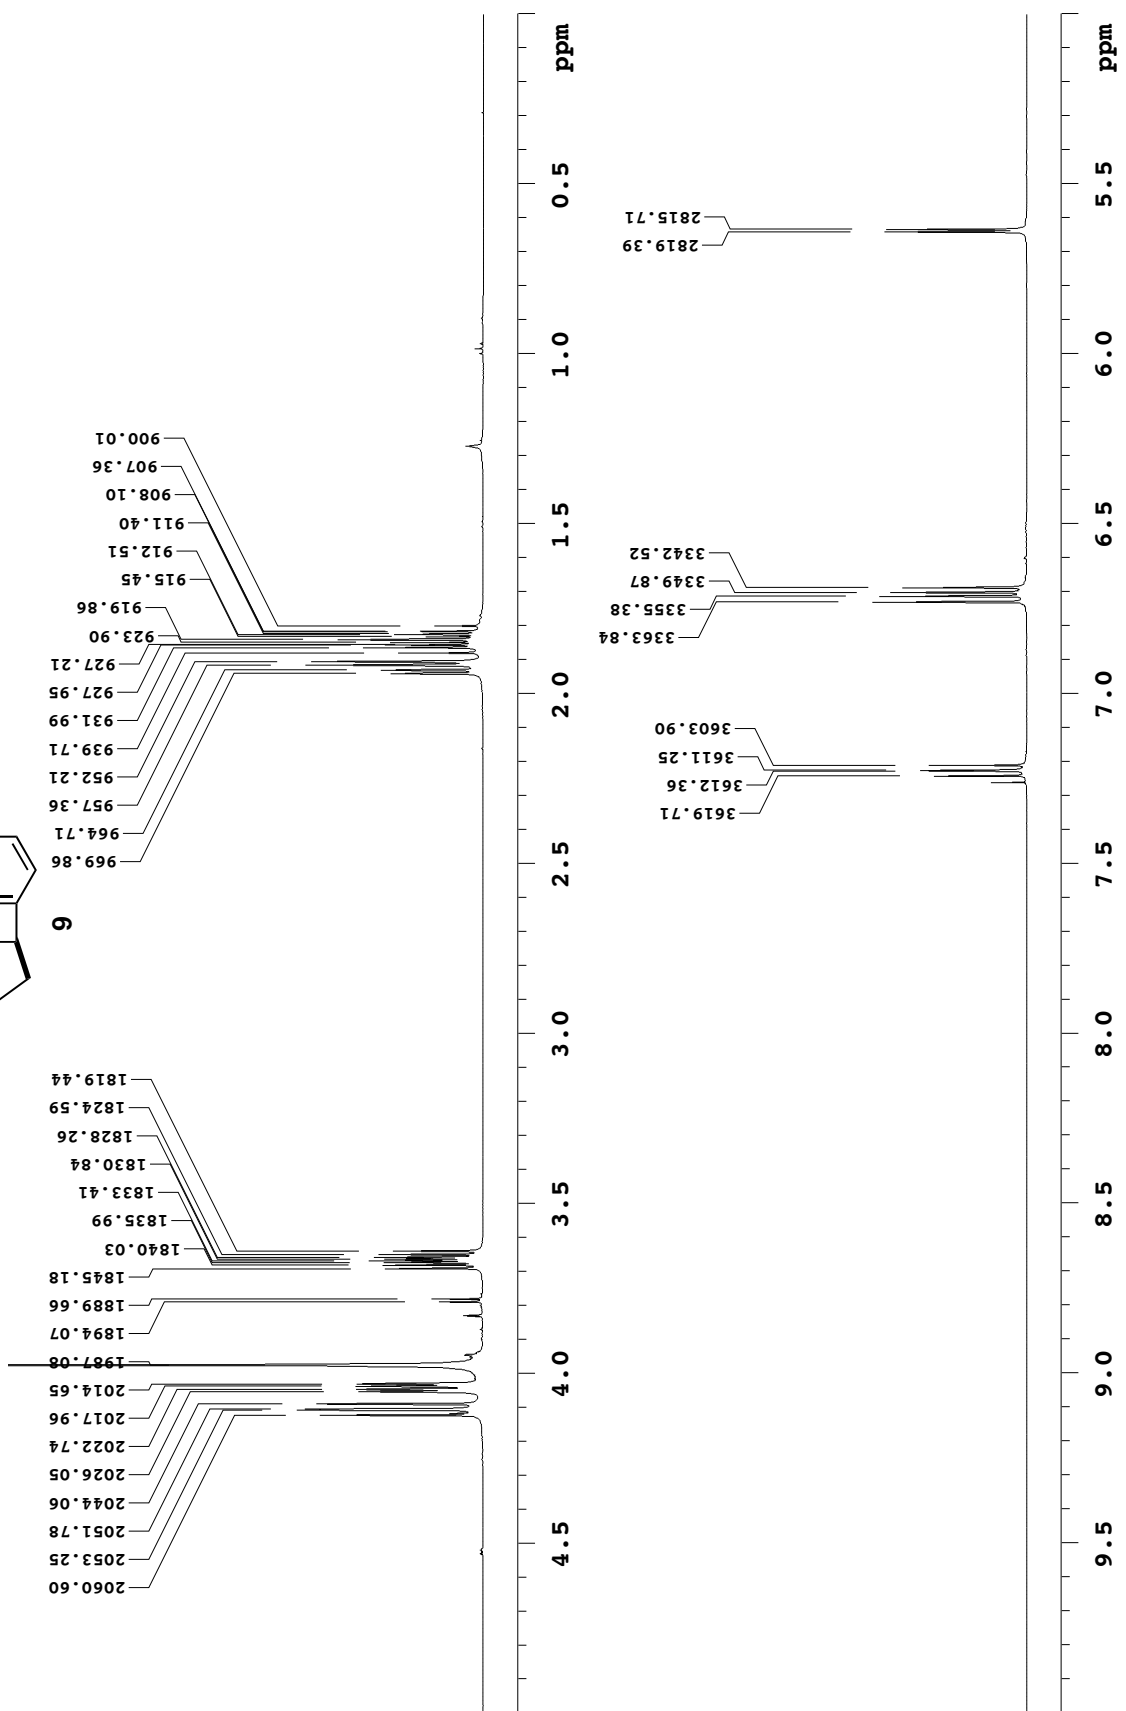



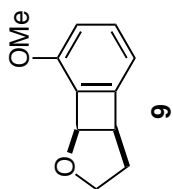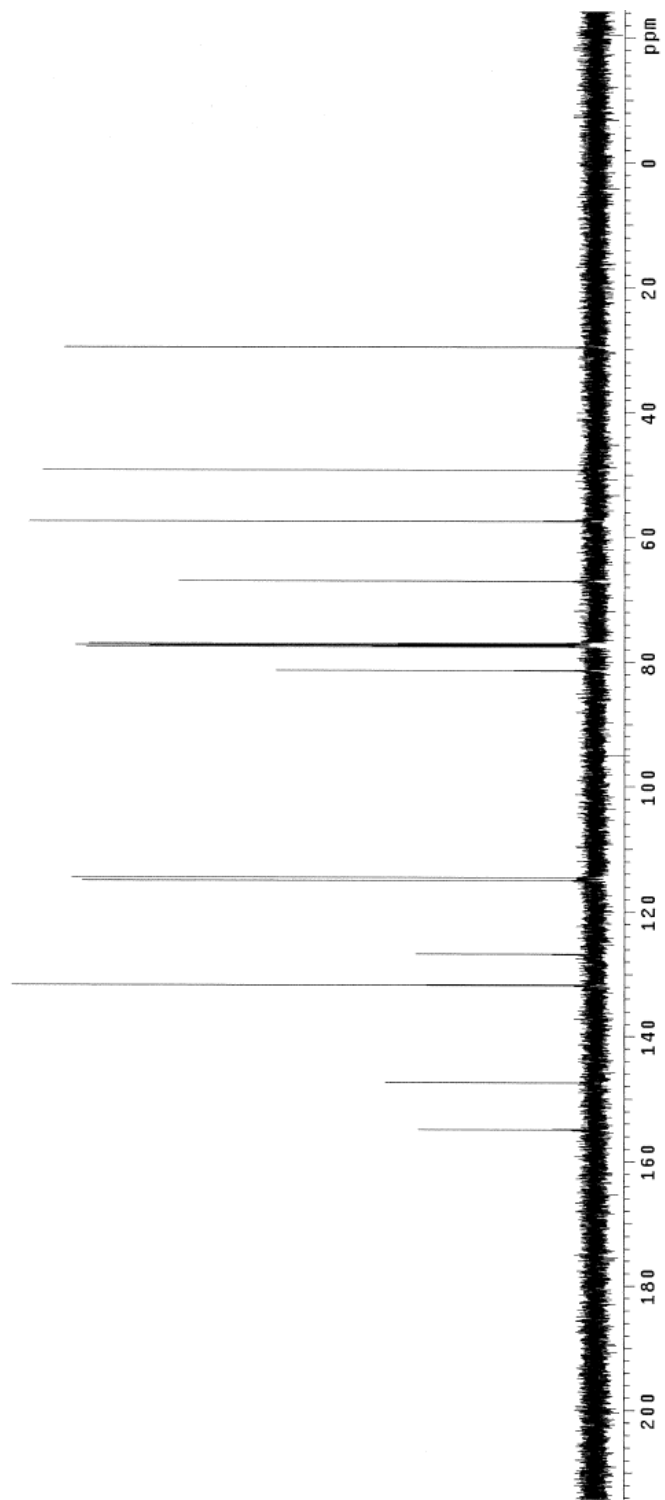

NOESY spectrum of compound **9** in CDCl<sub>3</sub>

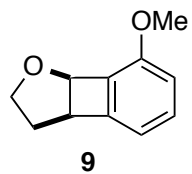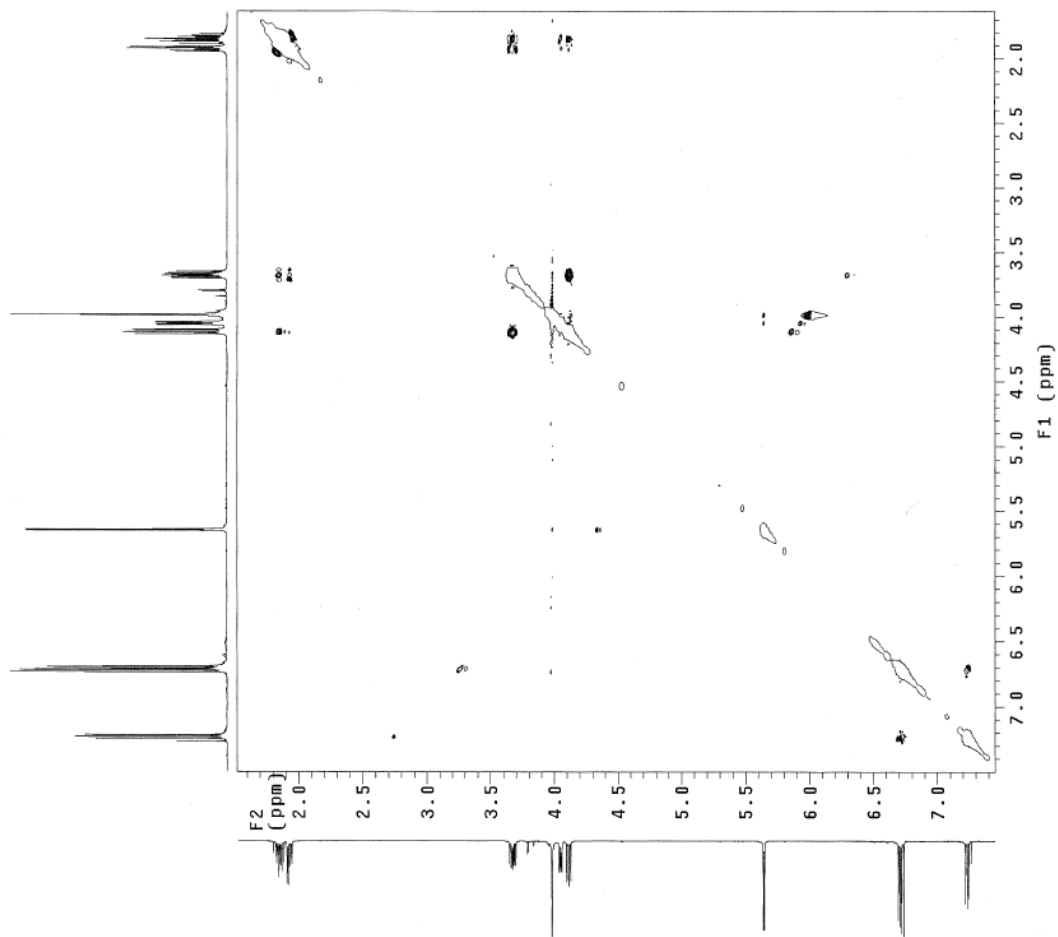

Expanded NOESY spectrum of compound **9** in CDCl<sub>3</sub>

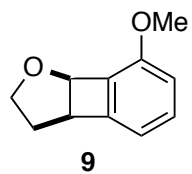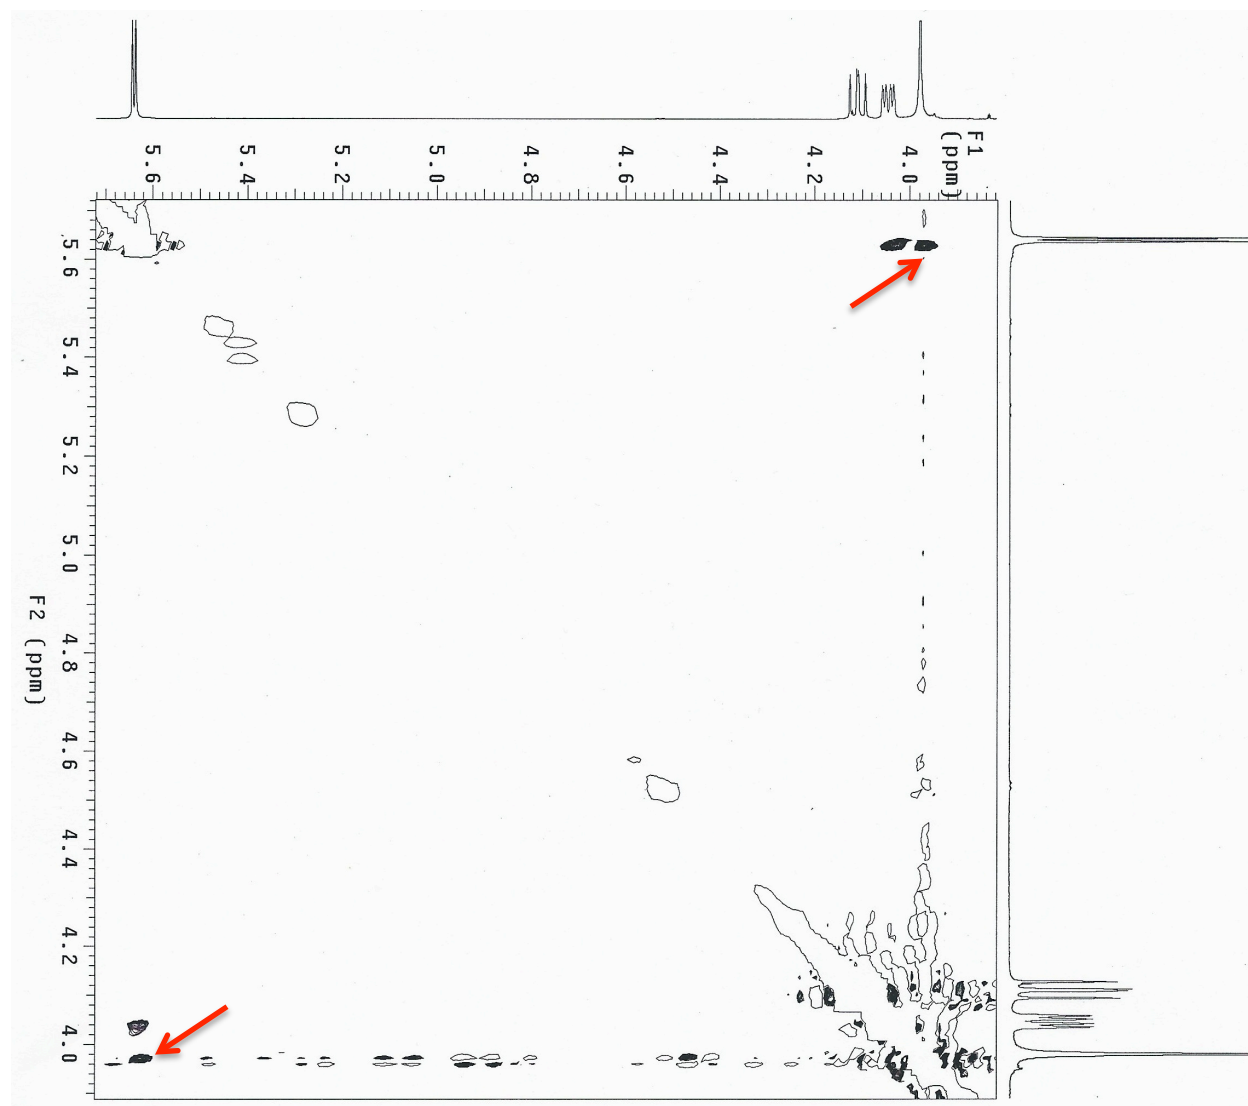

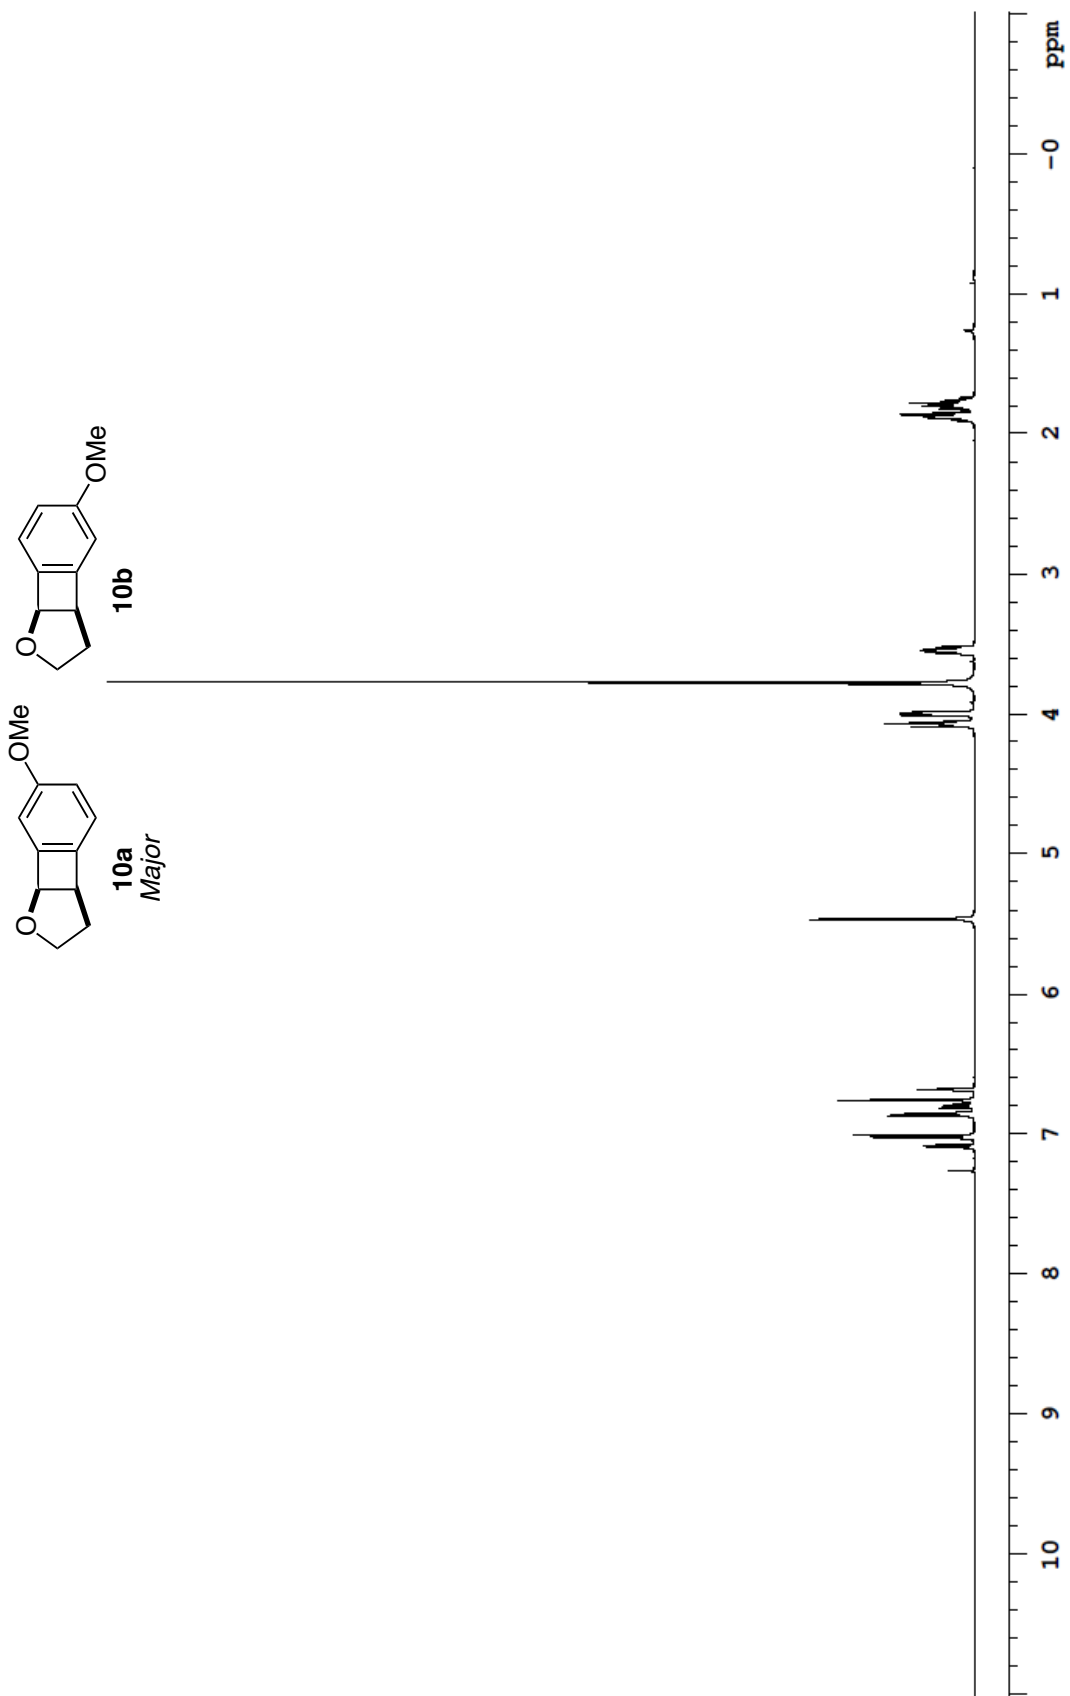

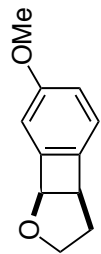

**10a**  
Major

2044.35  
2040.44  
2036.54  
2032.63  
2027.75  
2024.33  
2003.34  
2000.41  
1996.01  
1992.59  
1892.50  
1885.17  
1882.73  
1784.10  
1782.14  
1778.73  
1775.31  
1772.38  
1769.94  
1767.01  
1763.59  
1761.64  
1758.22

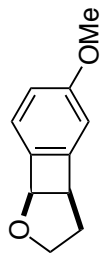

**10b**

948.65  
944.25  
940.84  
938.88  
935.95  
931.56  
926.68  
909.59  
904.21  
901.77  
897.87  
894.45  
890.05  
885.17  
882.73  
877.85

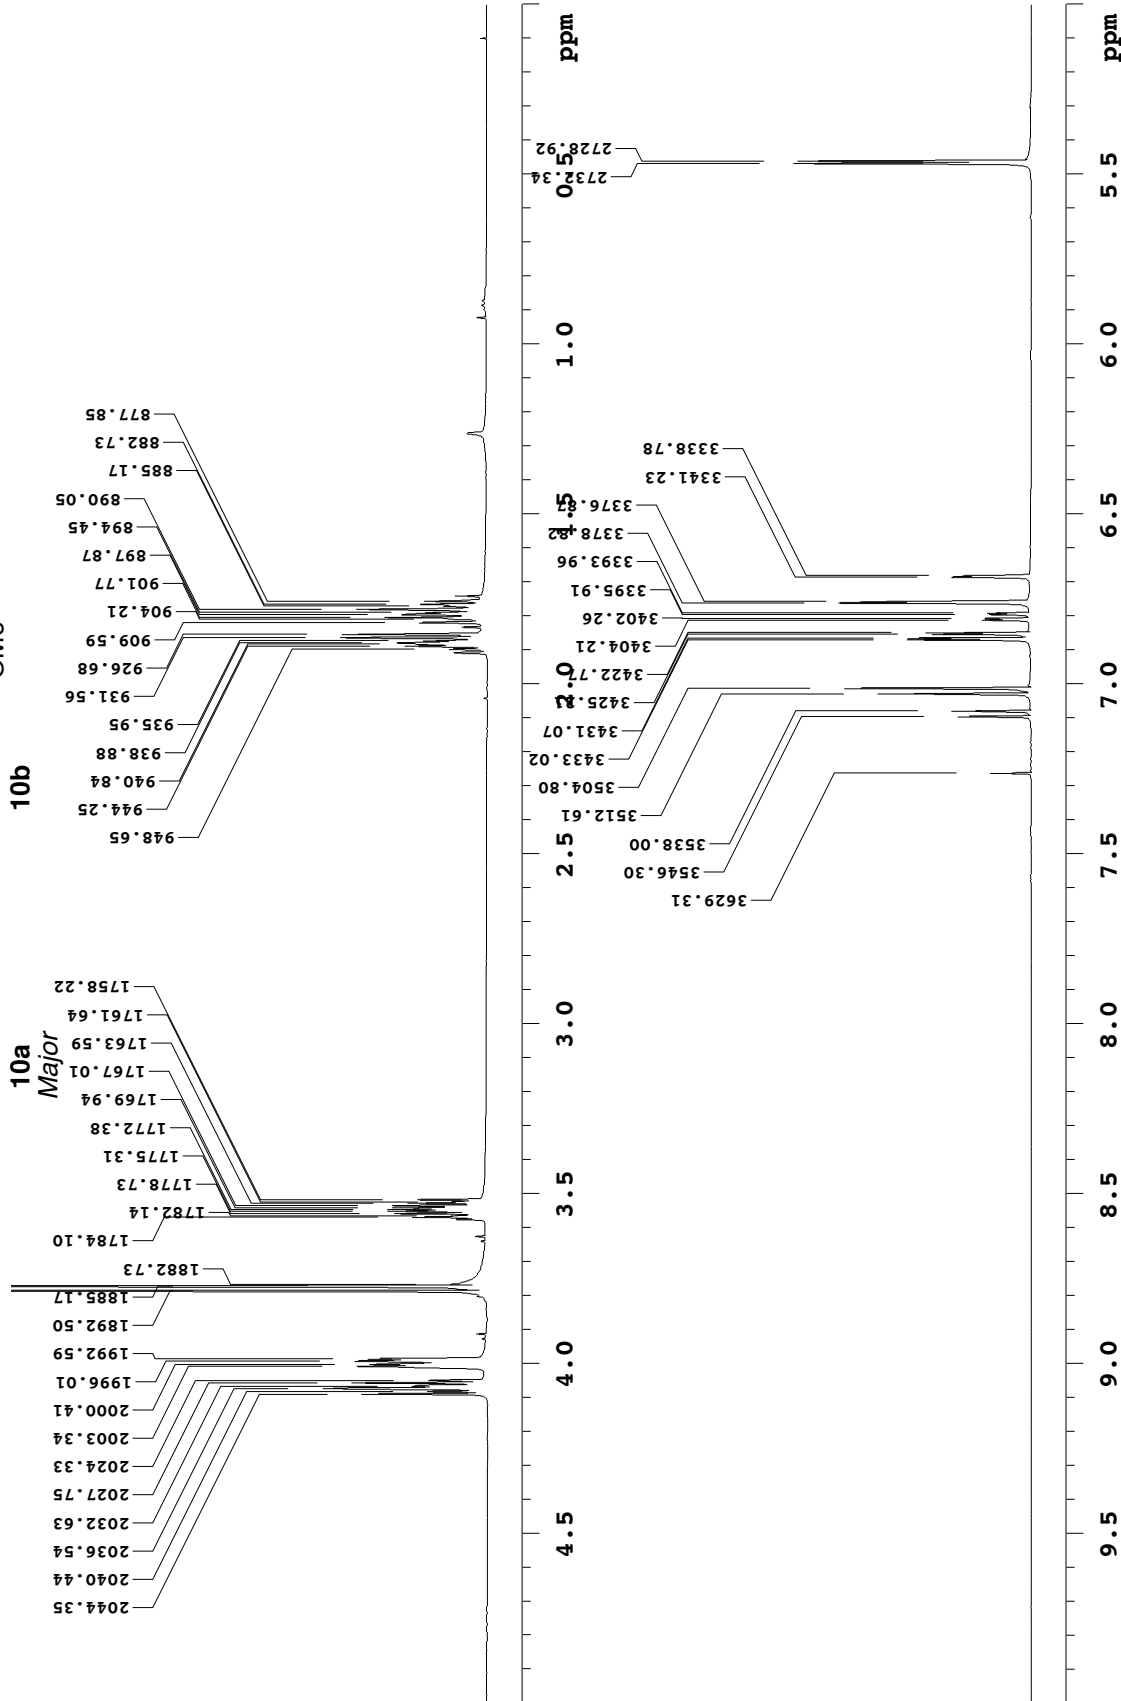

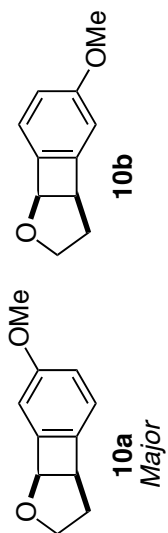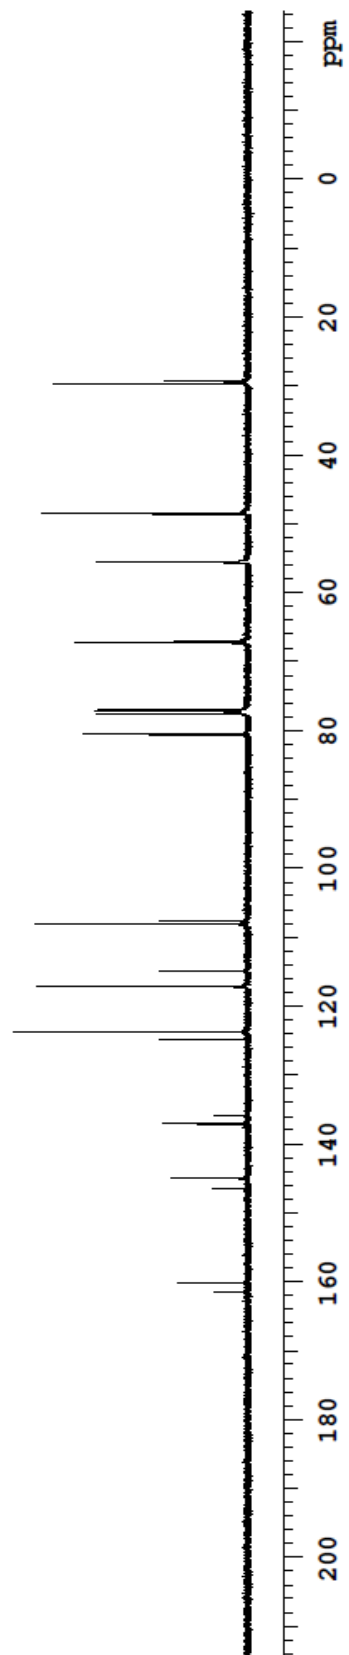

gCOSY spectrum of isomers **10a** + **10b** in CDCl<sub>3</sub>

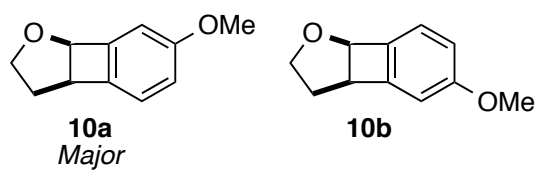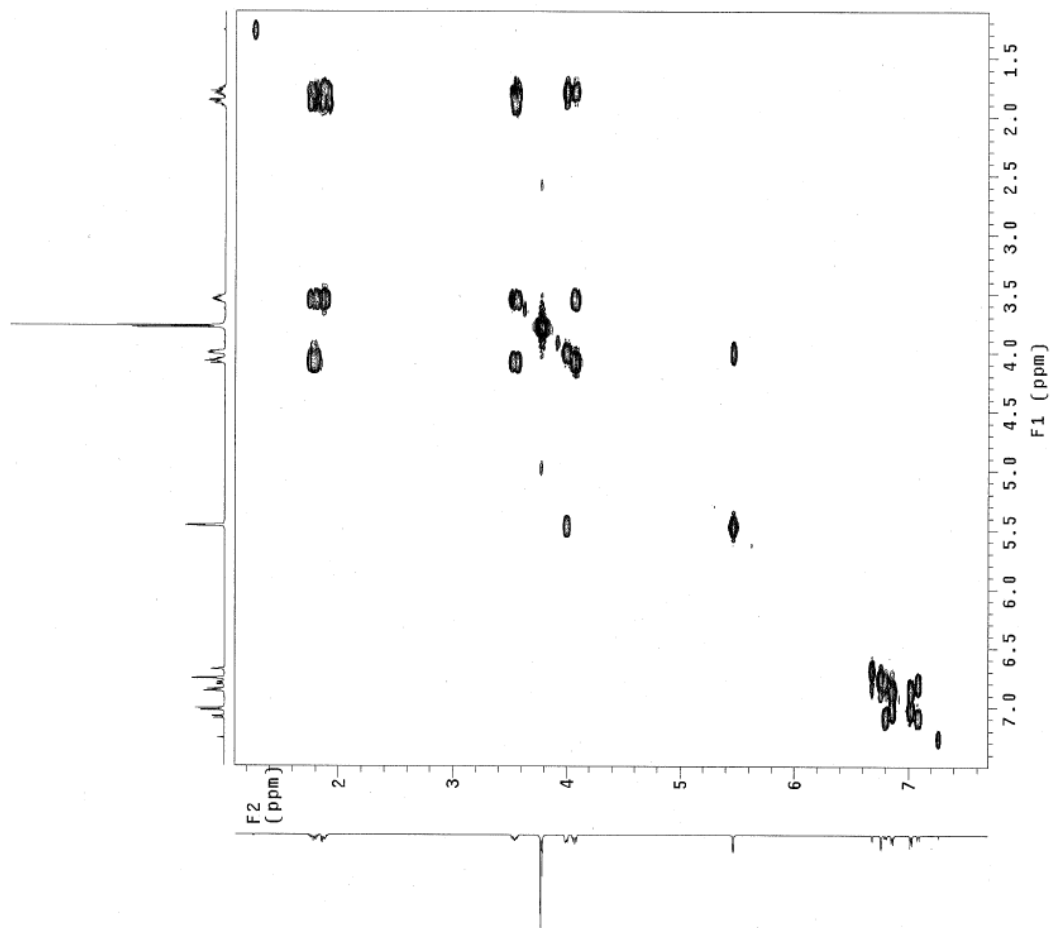

NOESY spectrum of isomers **10a** + **10b** in CDCl<sub>3</sub>

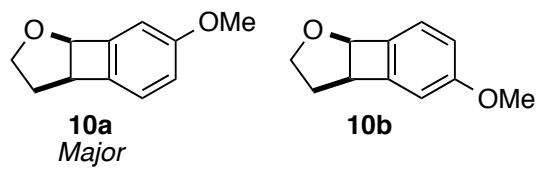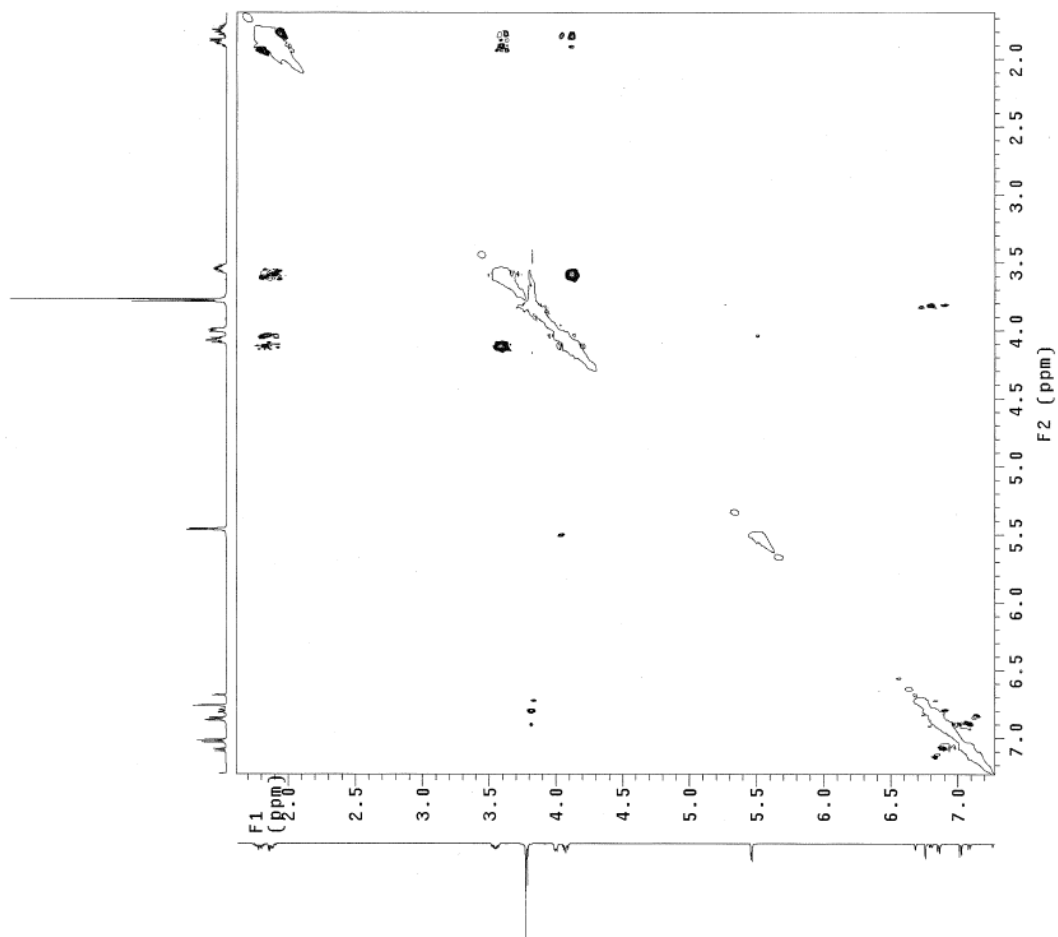



HMBC spectrum of isomers **10a** + **10b** in CDCl<sub>3</sub>

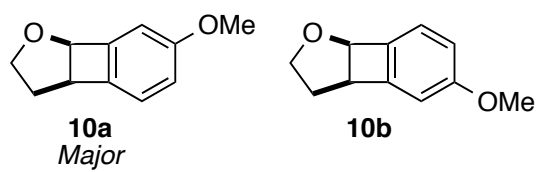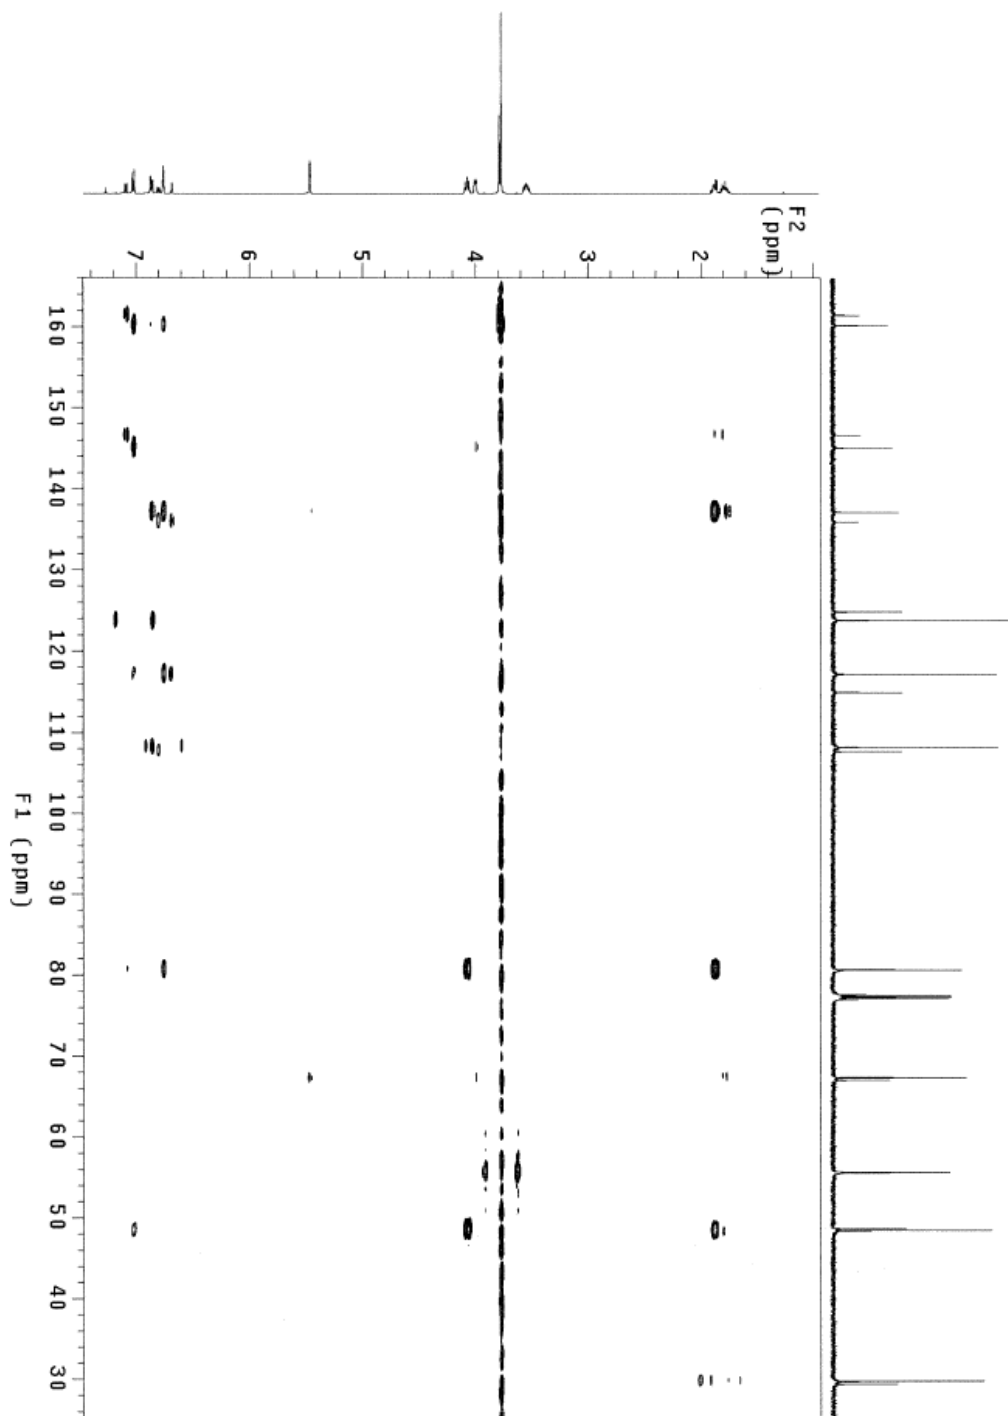

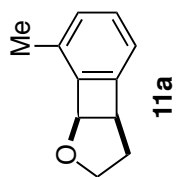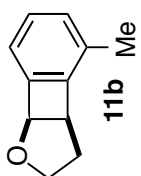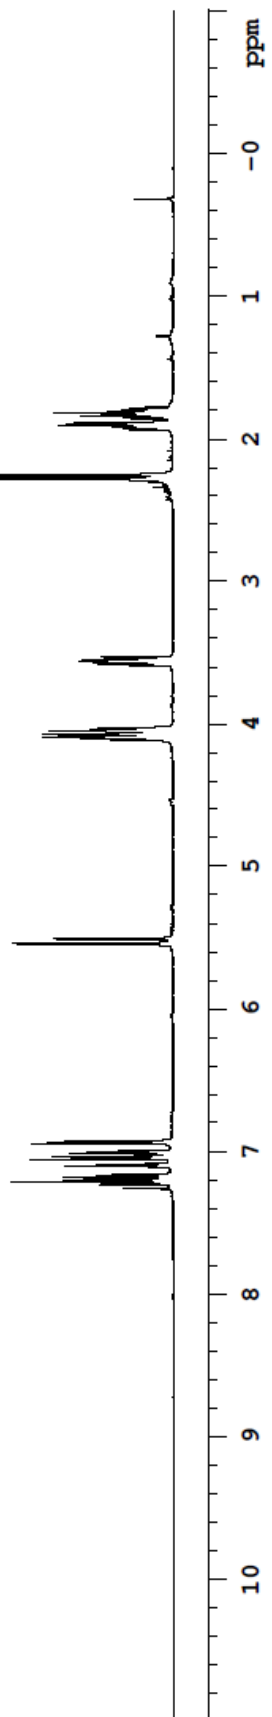

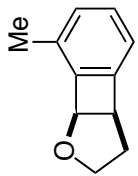

11a

2057.53  
2053.14  
2048.75  
2044.84  
2040.93  
2036.54  
2032.63  
2024.82  
2021.89  
2017.01  
2013.59  
1792.40  
1787.52  
1783.61  
1780.68  
1778.24  
1775.80  
1771.89  
1766.52

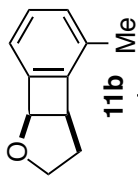

11b Me

1140.54  
1126.38  
967.20  
961.83  
958.90  
954.51  
949.62  
946.69  
941.32  
928.14  
920.33  
915.93  
913.00  
908.12  
900.31  
896.40

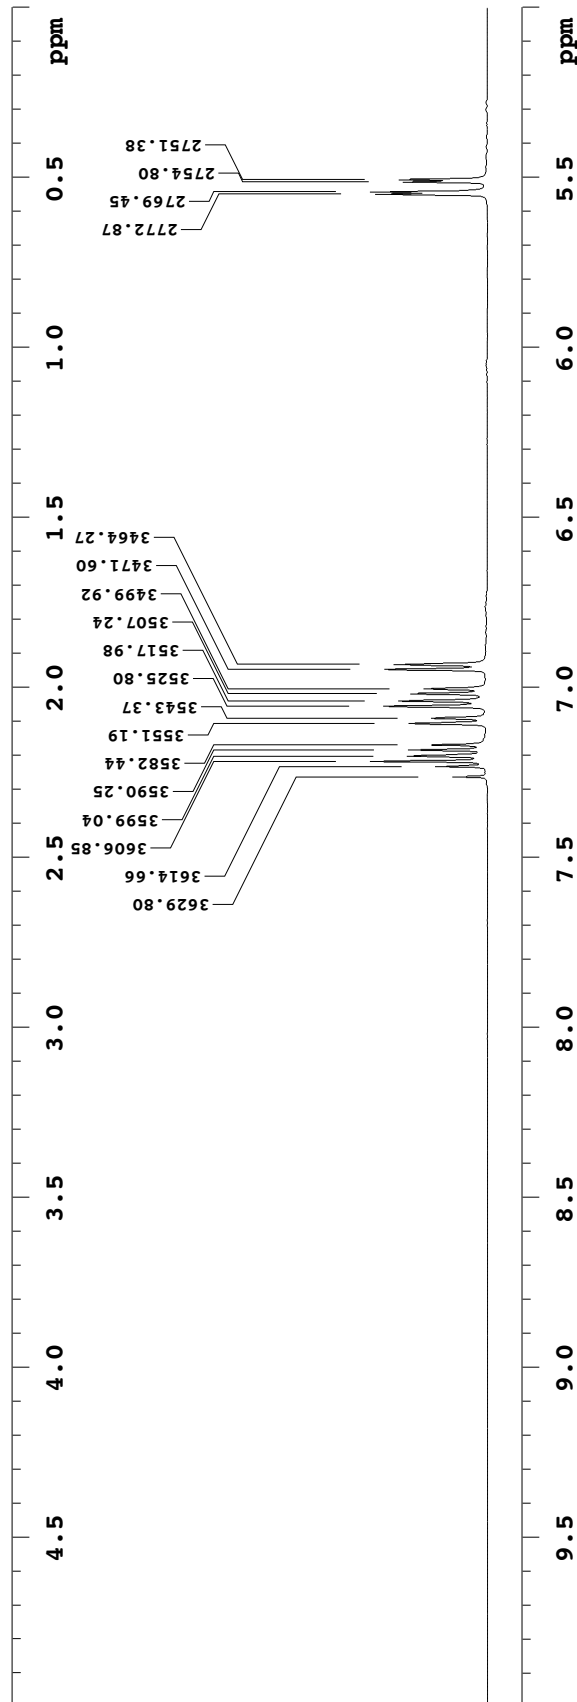

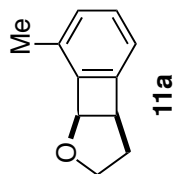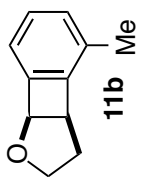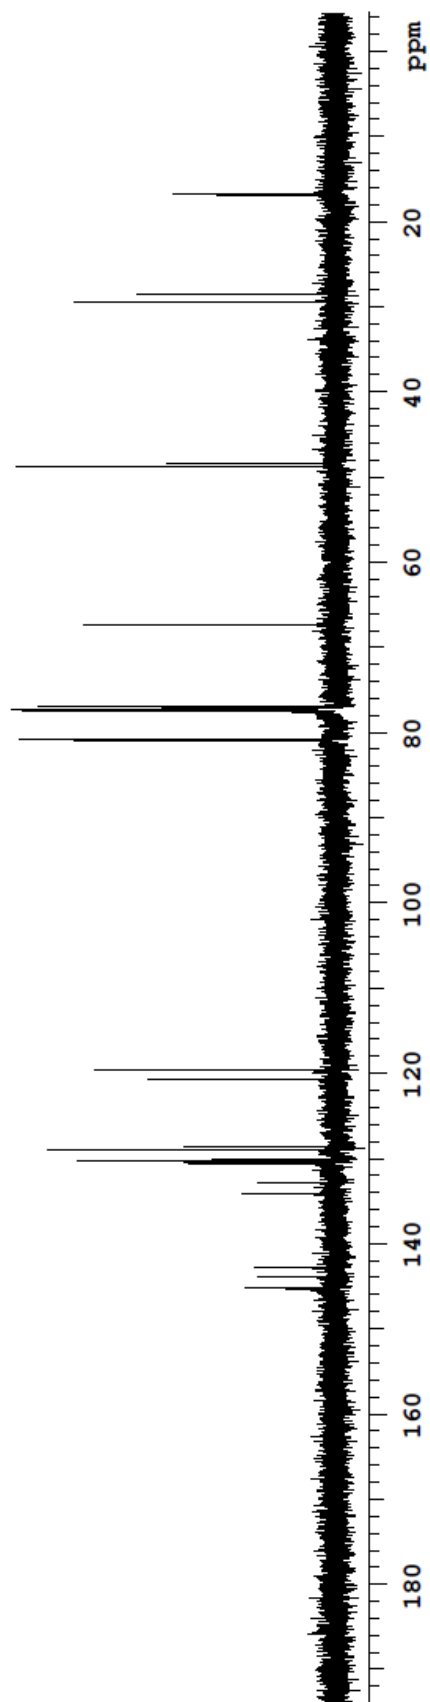

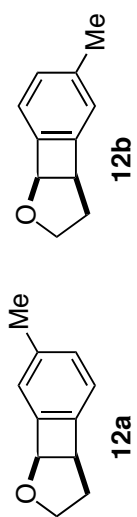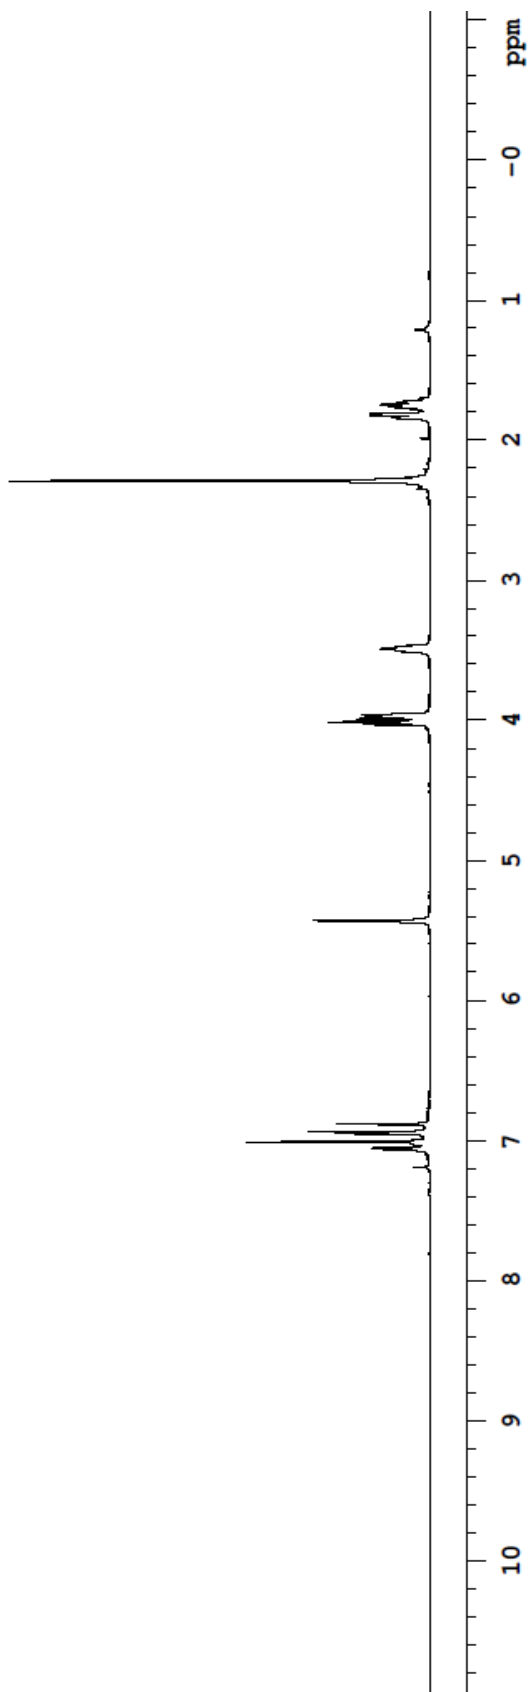

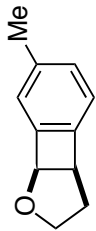

12a

2048.97  
2040.91  
2032.48  
2025.52  
2022.22  
2018.19  
2014.53  
1791.05  
1787.76  
1785.56  
1784.09  
1781.53  
1779.33  
1776.76  
1774.20  
1772.73  
1770.54  
1767.24

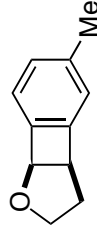

12b

1181.43  
1176.30  
957.22  
955.39  
952.46  
950.63  
944.77  
943.30  
940.00  
918.02  
915.46  
911.06  
906.30  
903.73  
898.61  
895.67

4.5 4.0 3.5 3.0 2.5 2.0 1.5 1.0 0.5 ppm

9.5 9.0 8.5 8.0 7.5 7.0 6.5 6.0 5.5 ppm

3567.89  
3560.19  
3538.58  
3509.64  
3503.04  
3474.83

2752.01  
2749.44

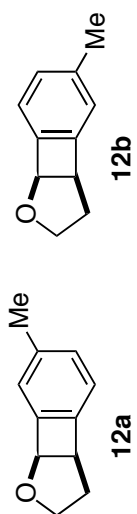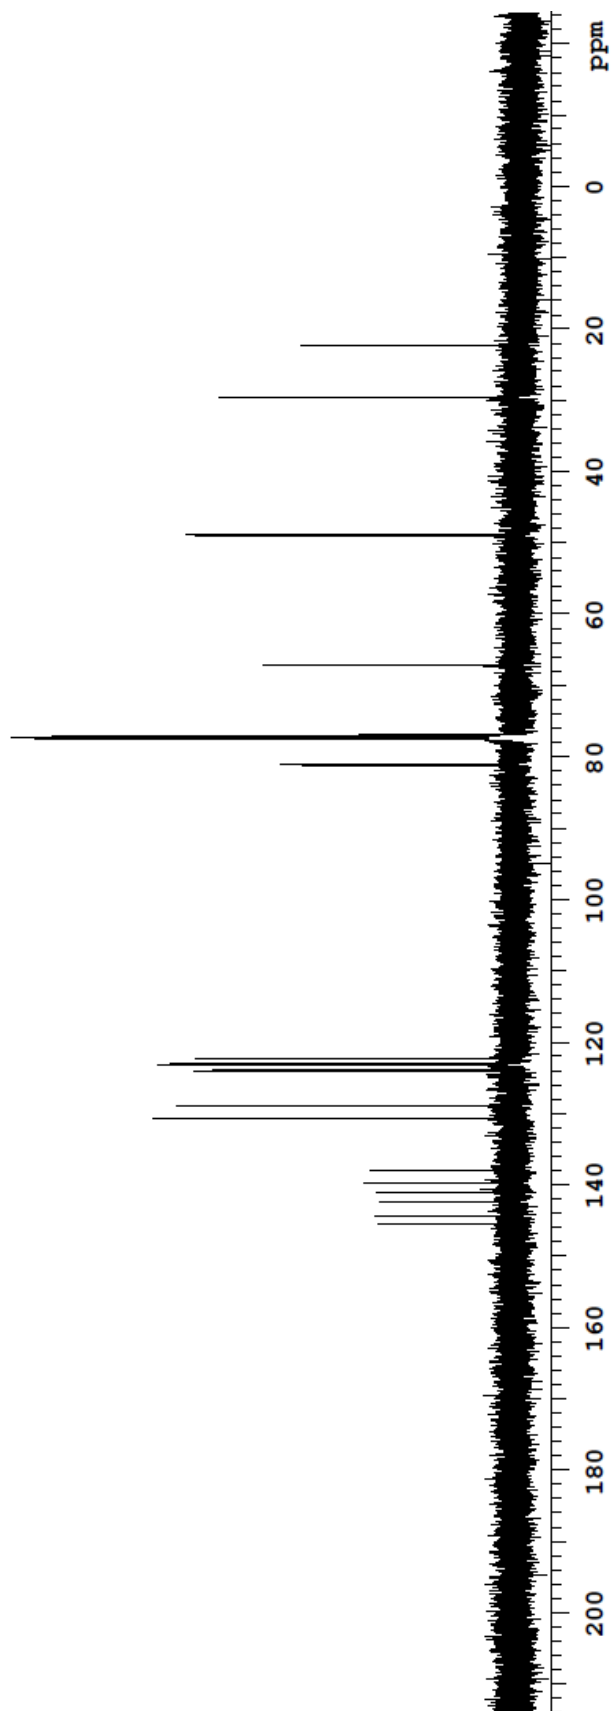

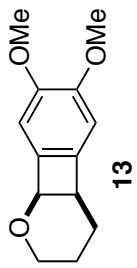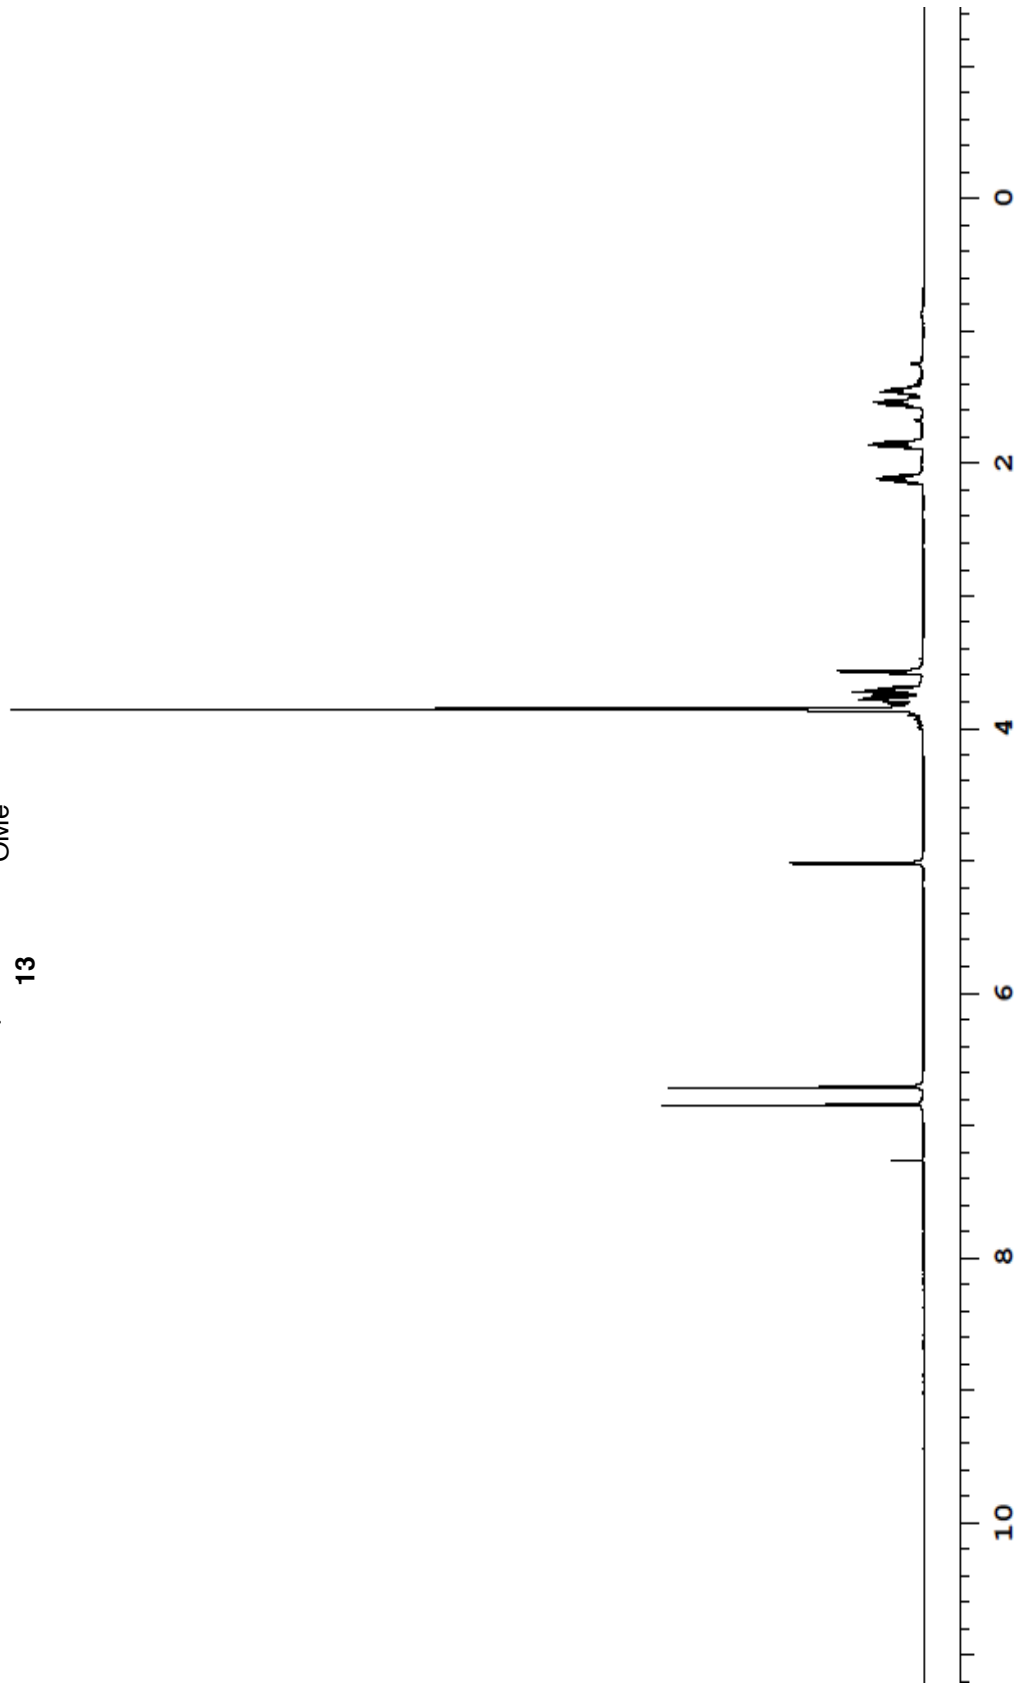



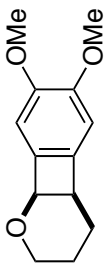

**13**

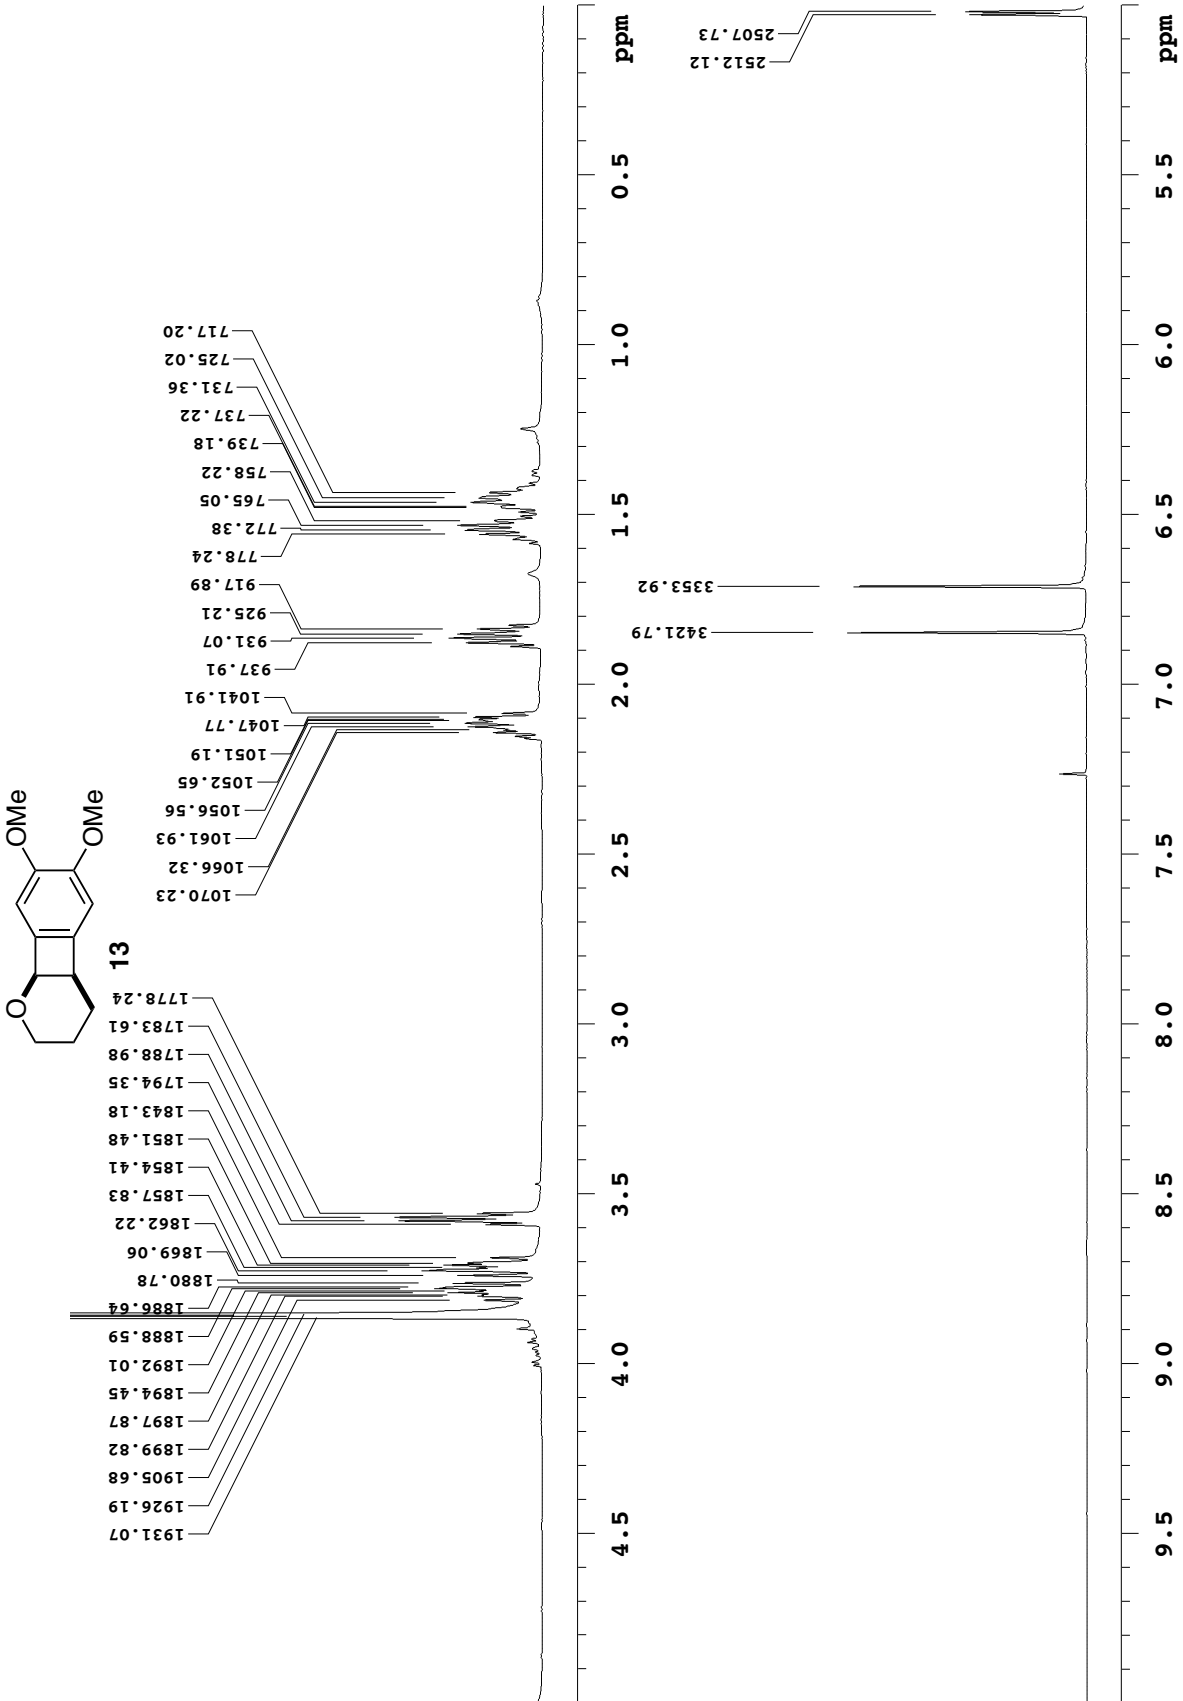

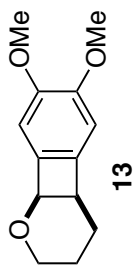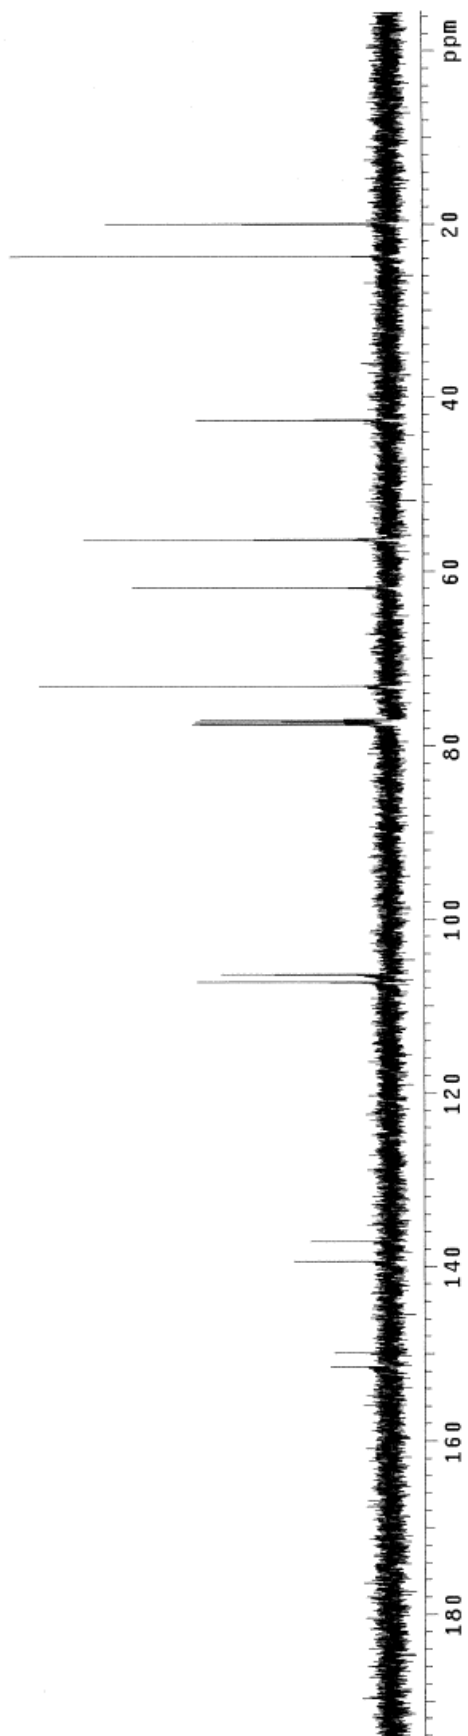

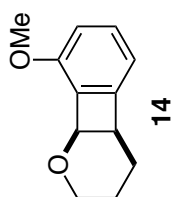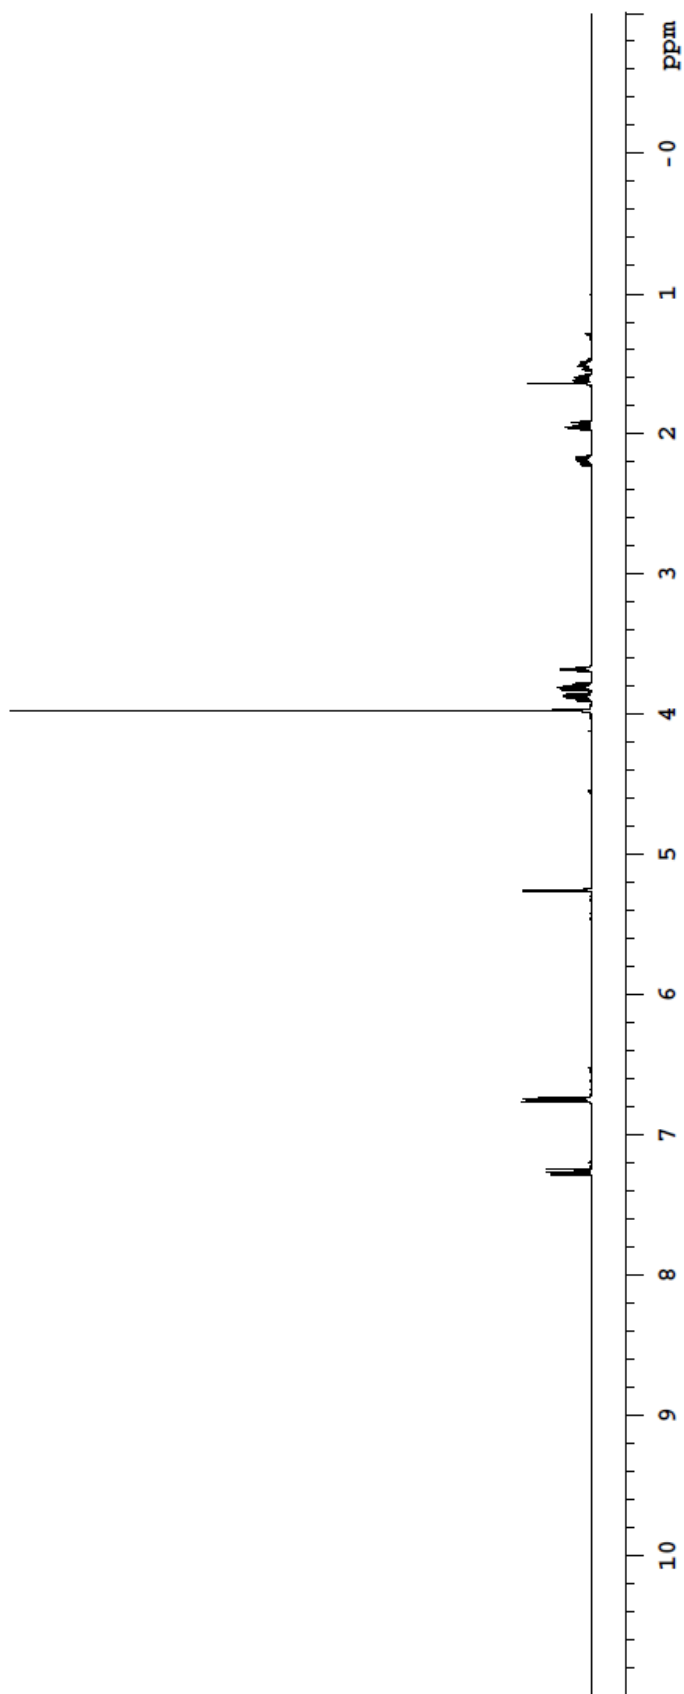

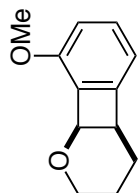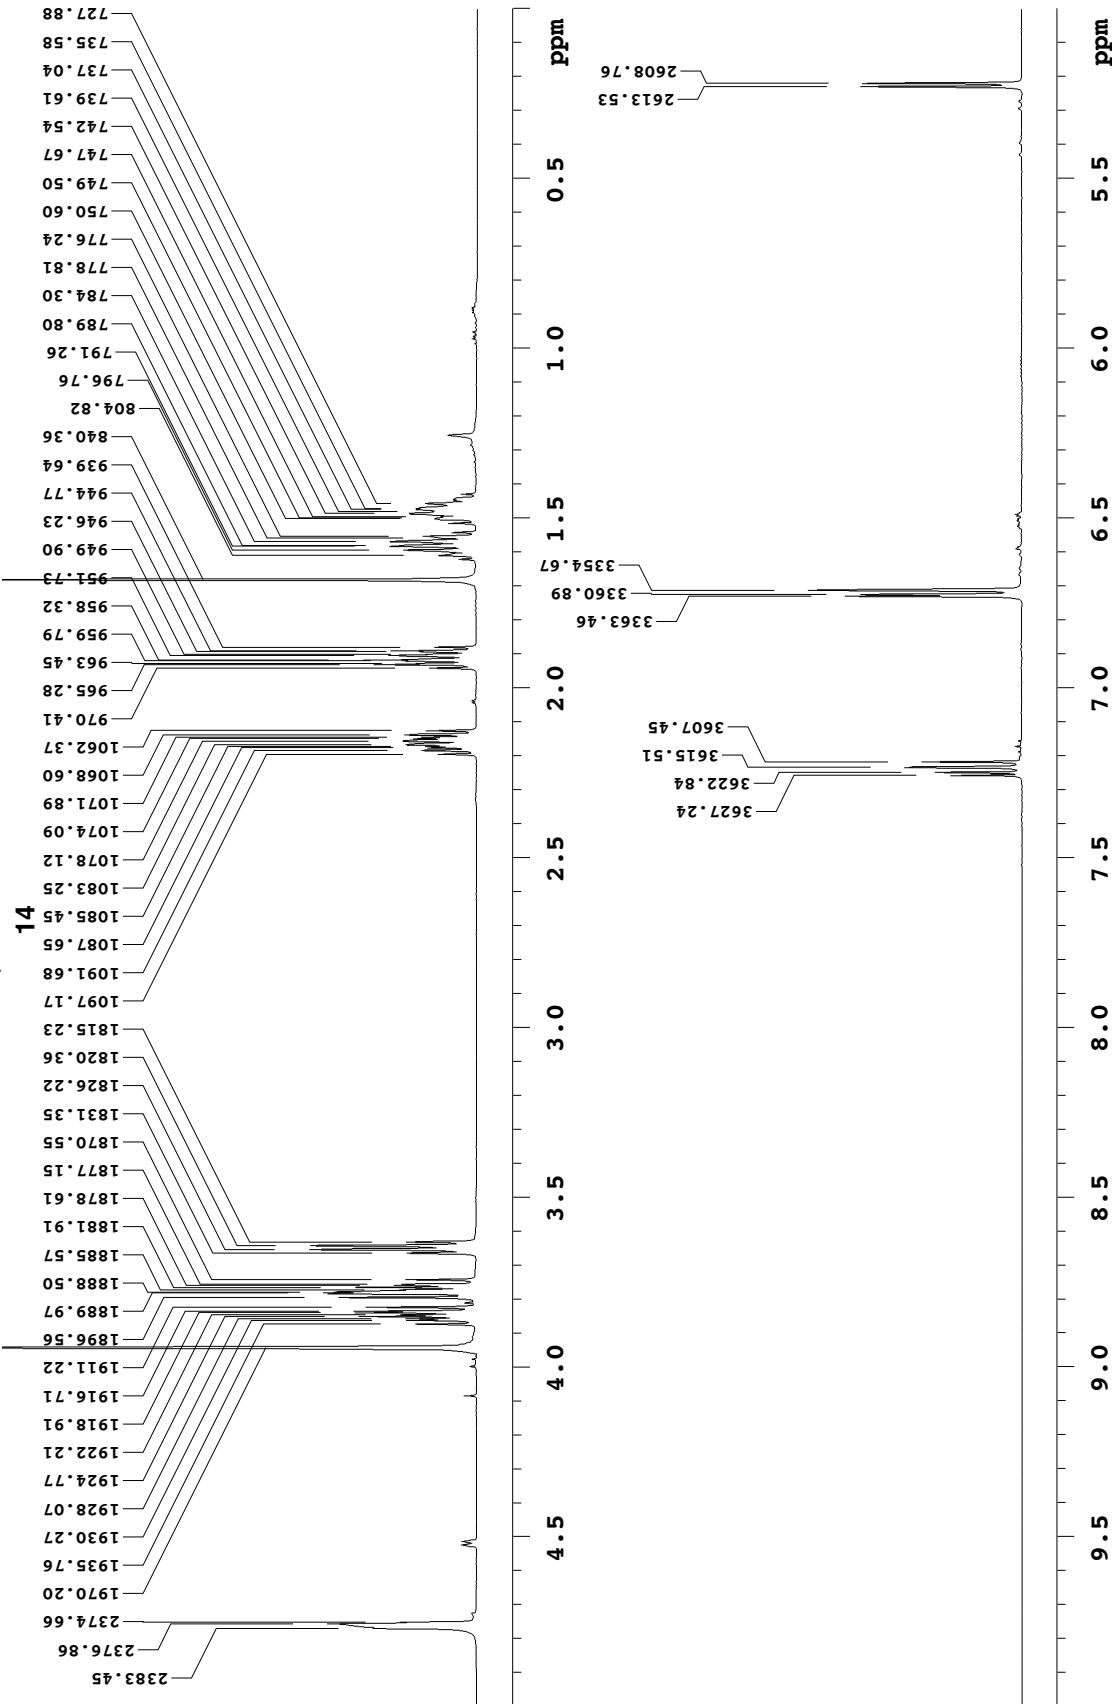

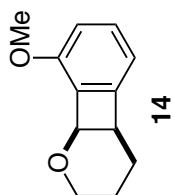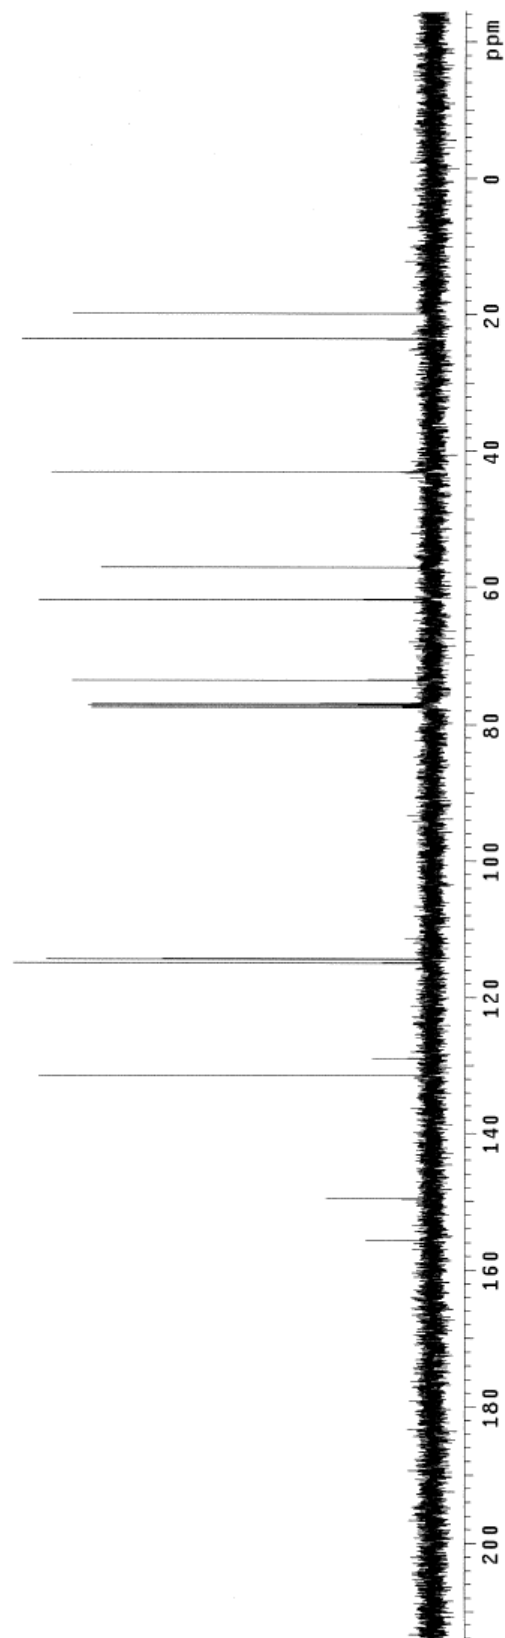

NOESY spectrum of compound **14** in CDCl<sub>3</sub>

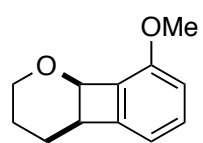

**14**

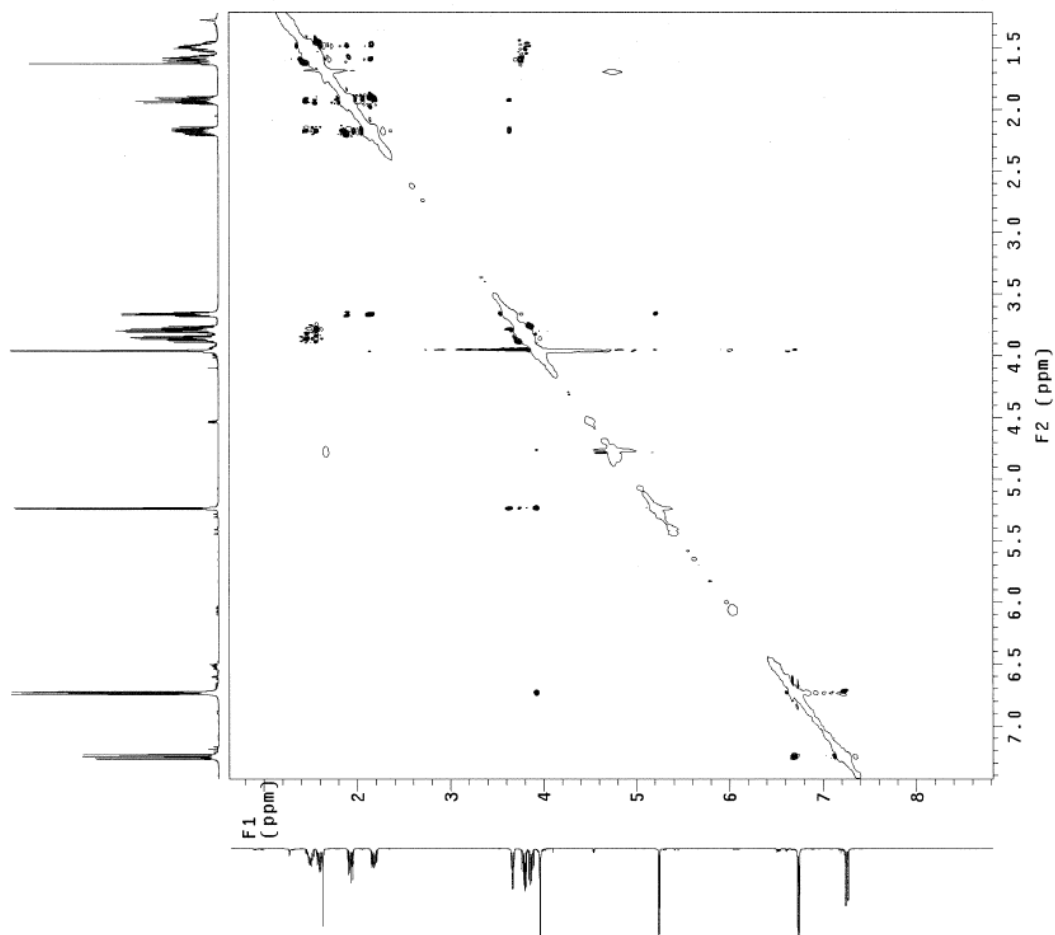

Expanded NOESY spectrum of compound **14** in CDCl<sub>3</sub>

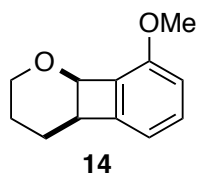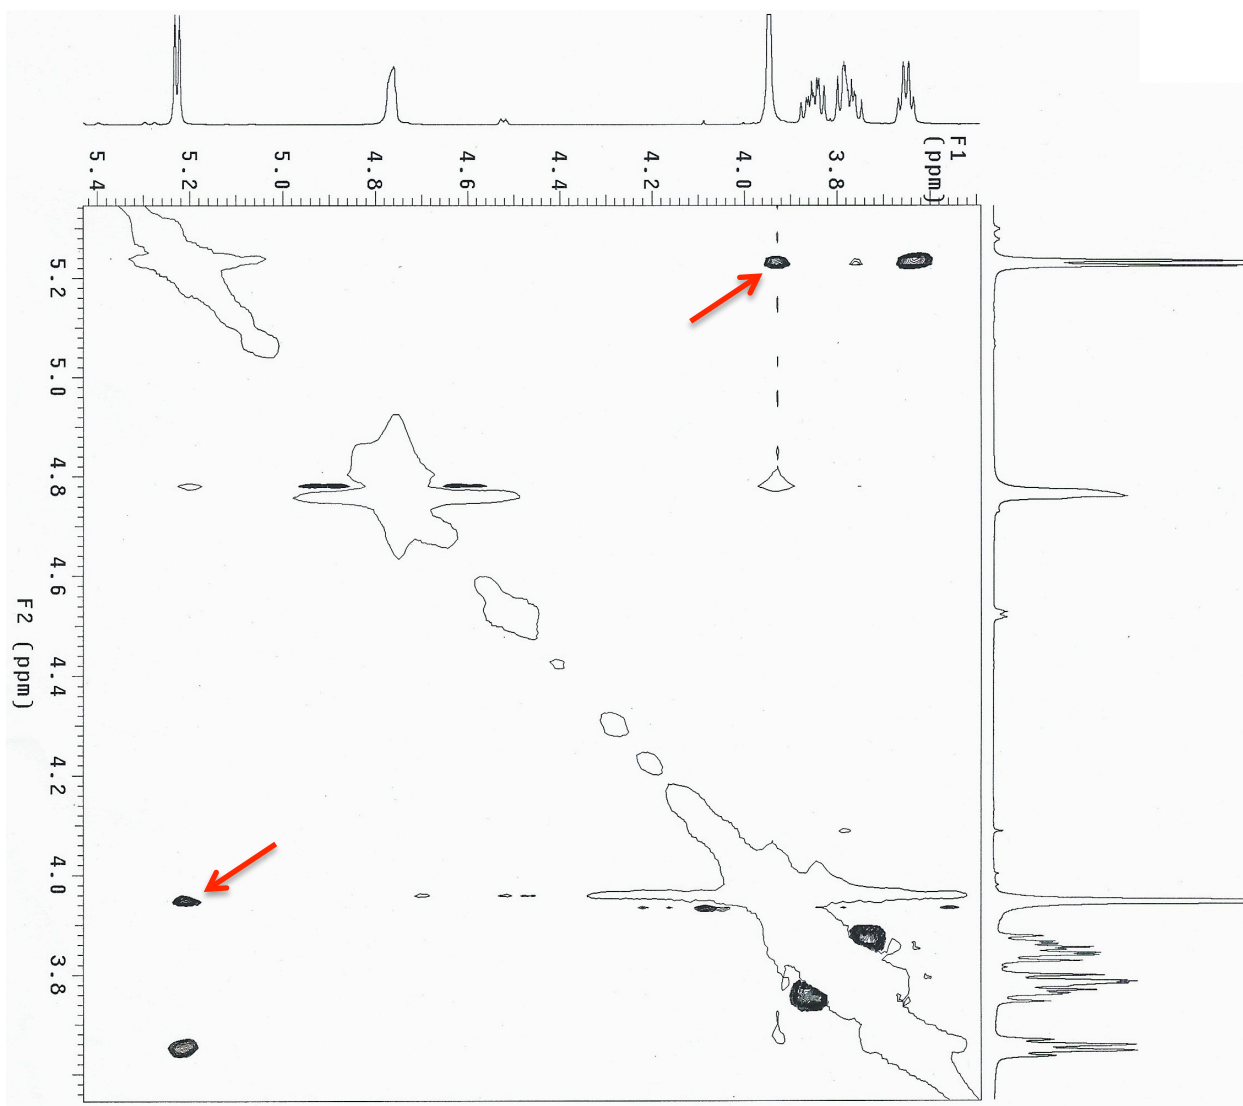

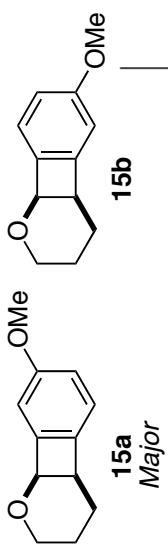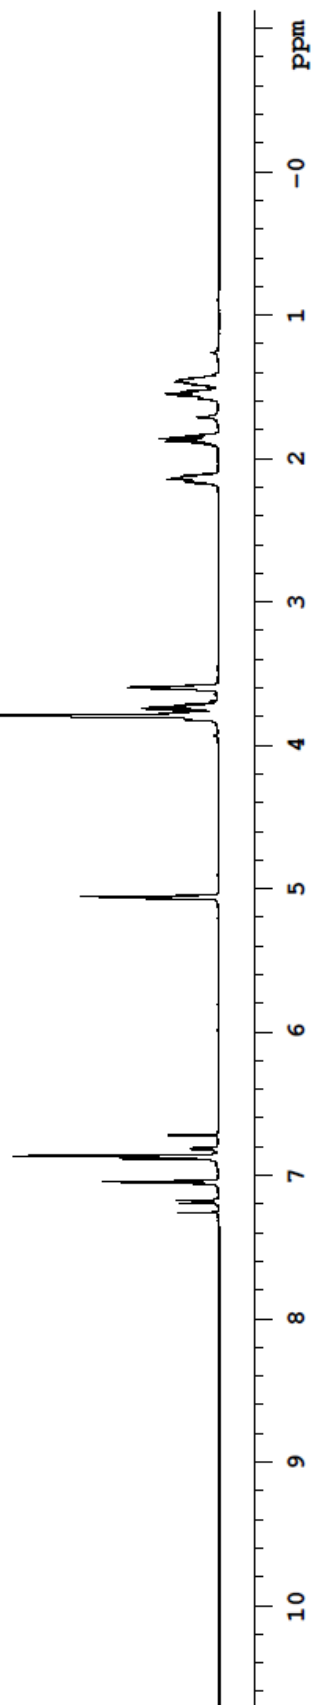



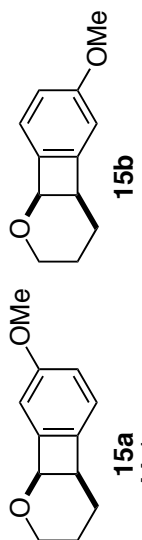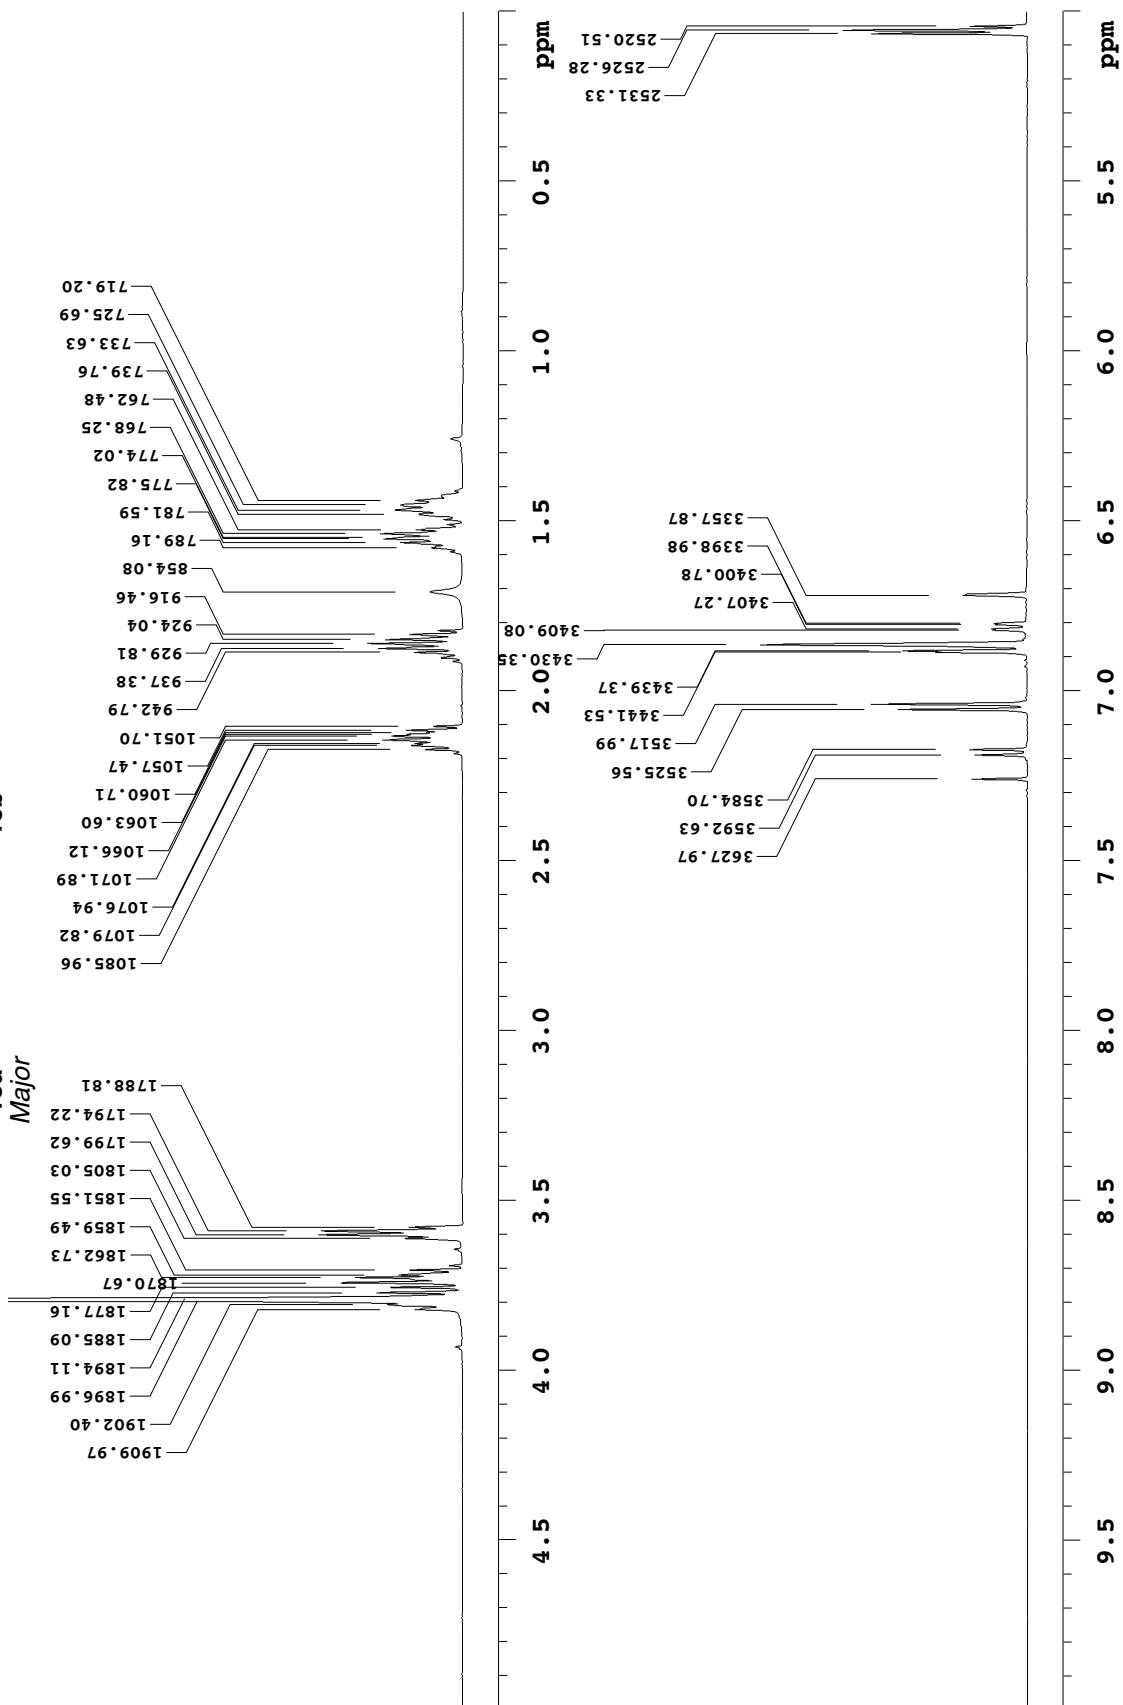

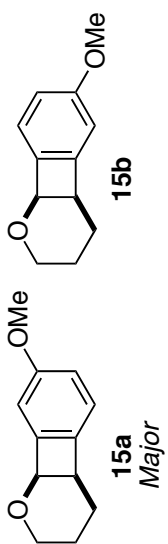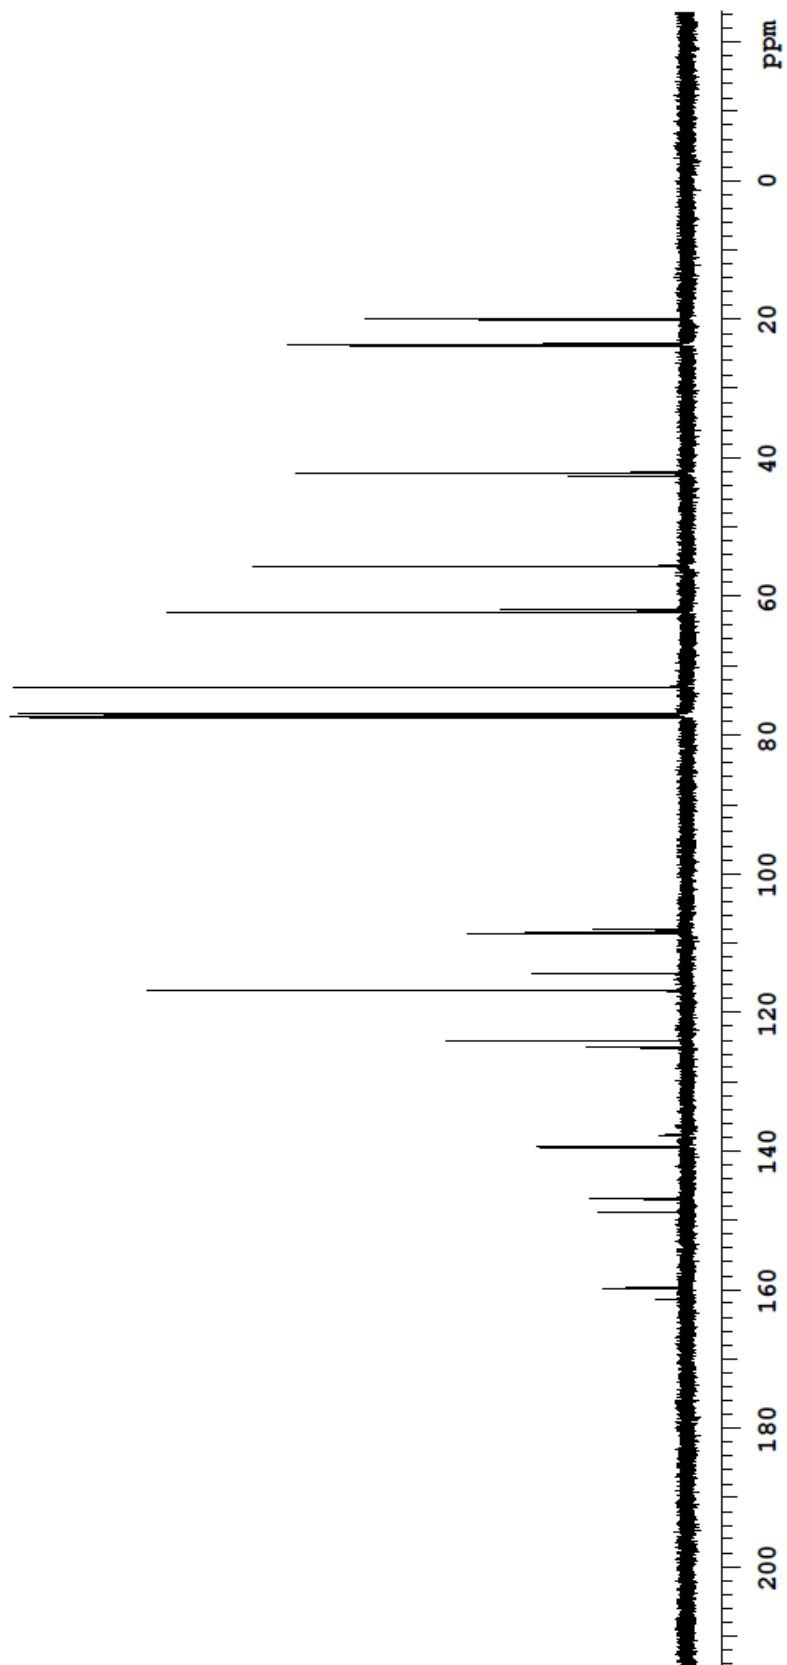

NOESY spectrum of isomers **15a** + **15b** in CDCl<sub>3</sub>

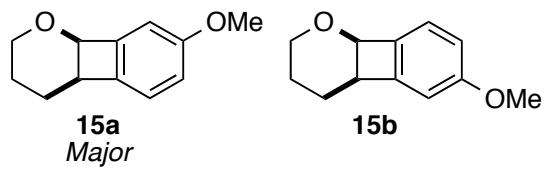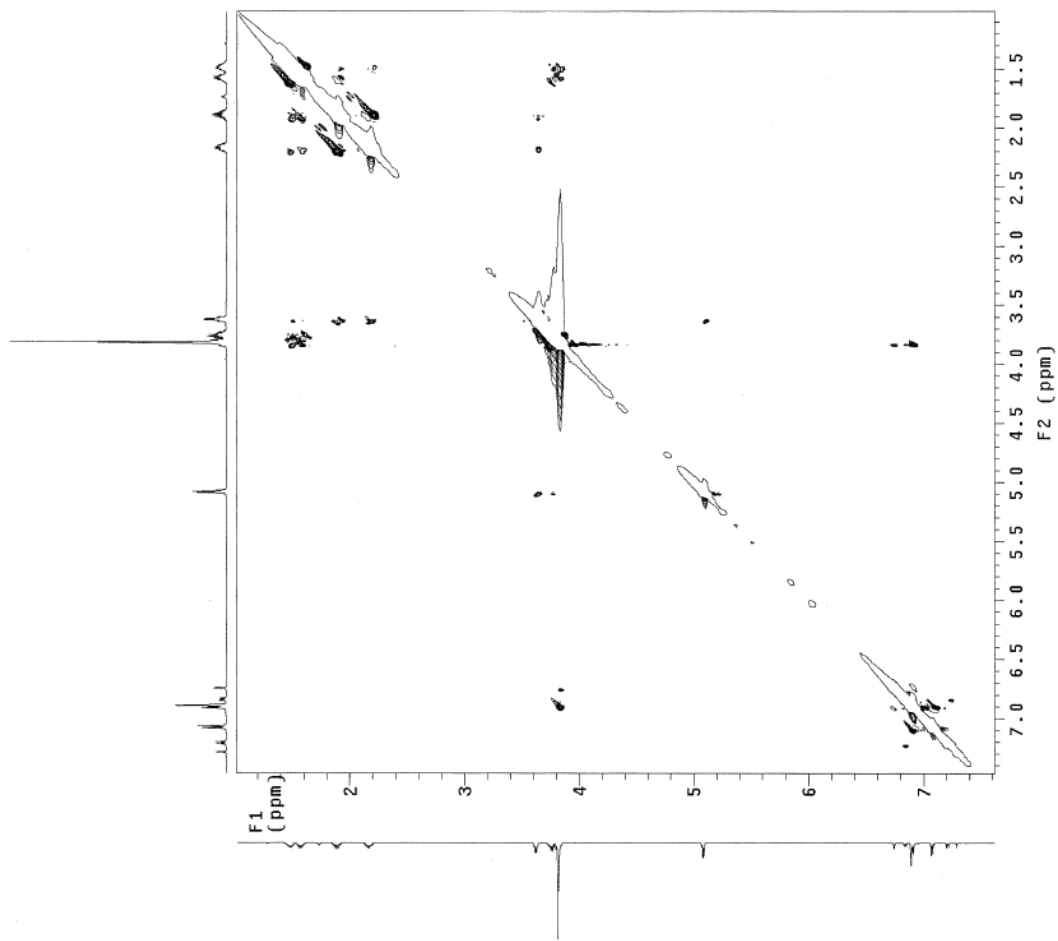

HMBC spectrum of isomers **15a** + **15b** in CDCl<sub>3</sub>

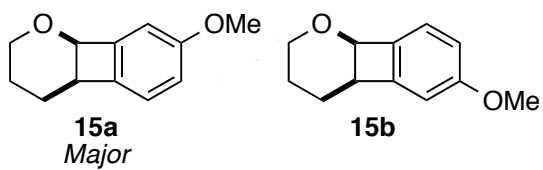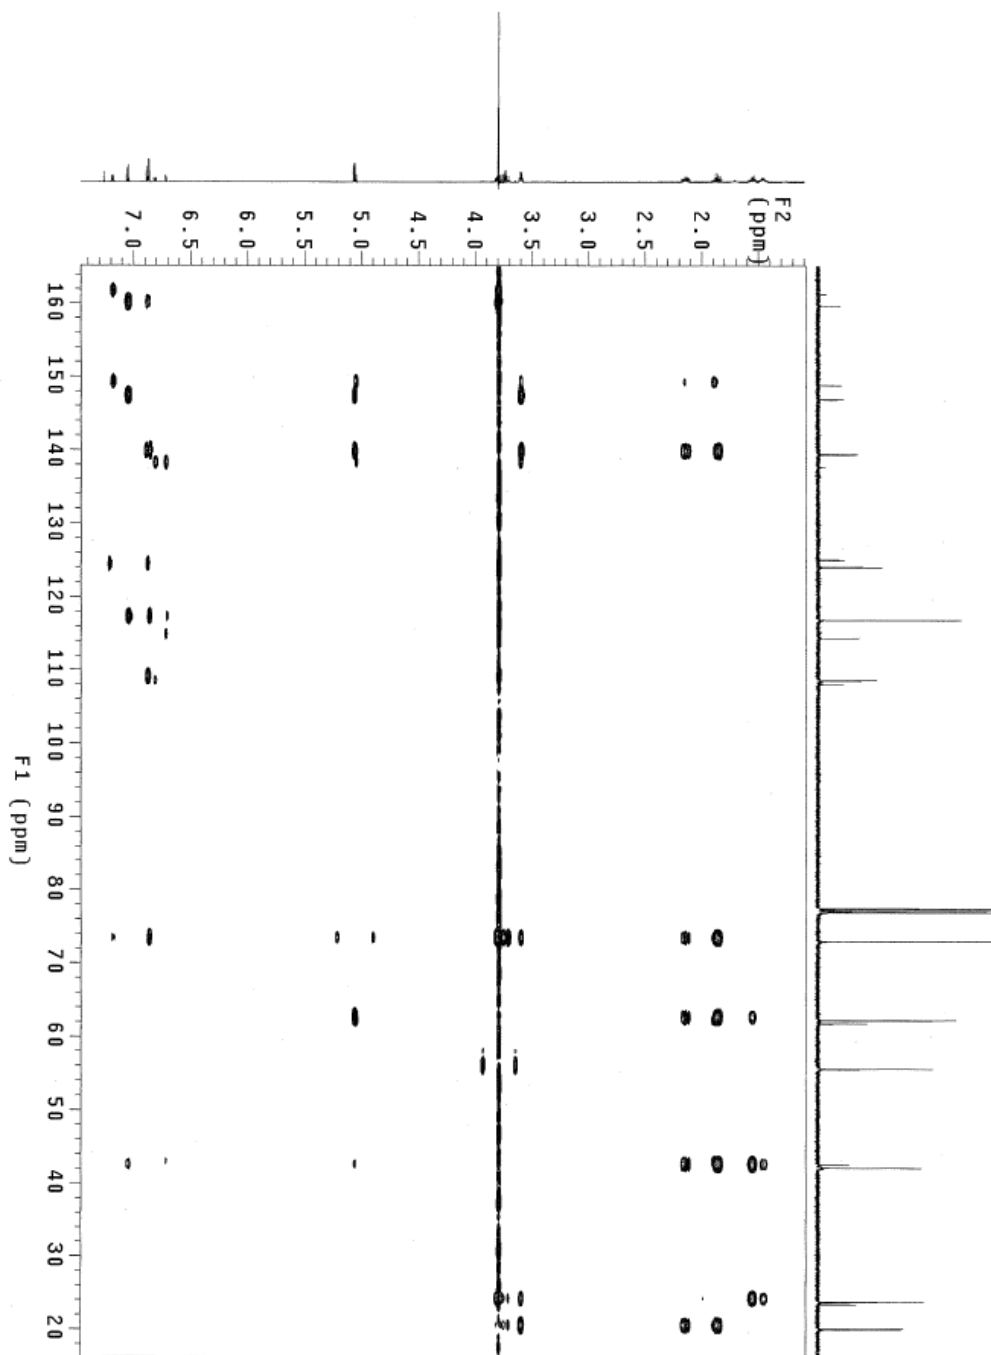

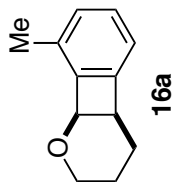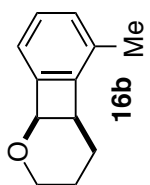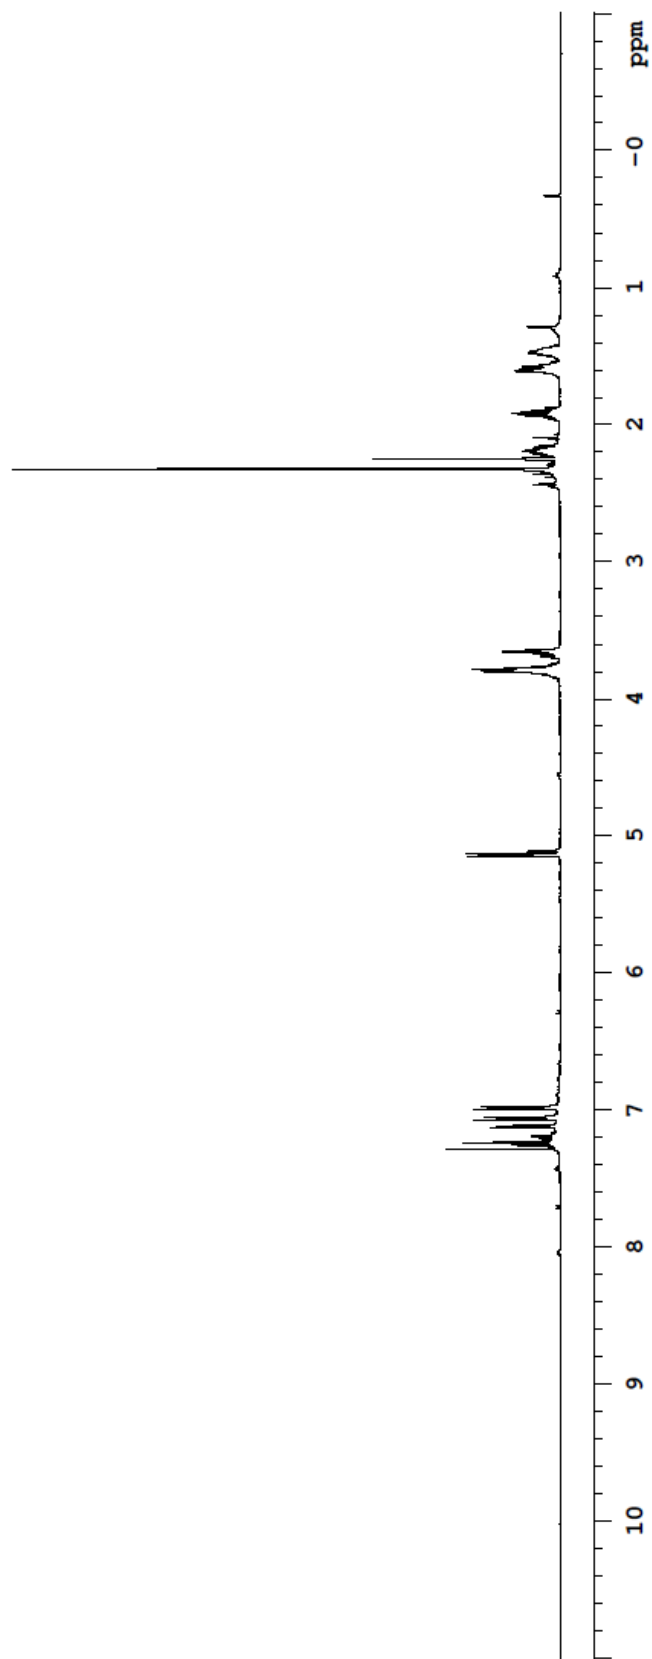

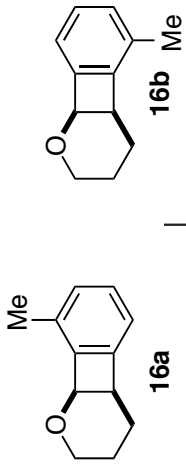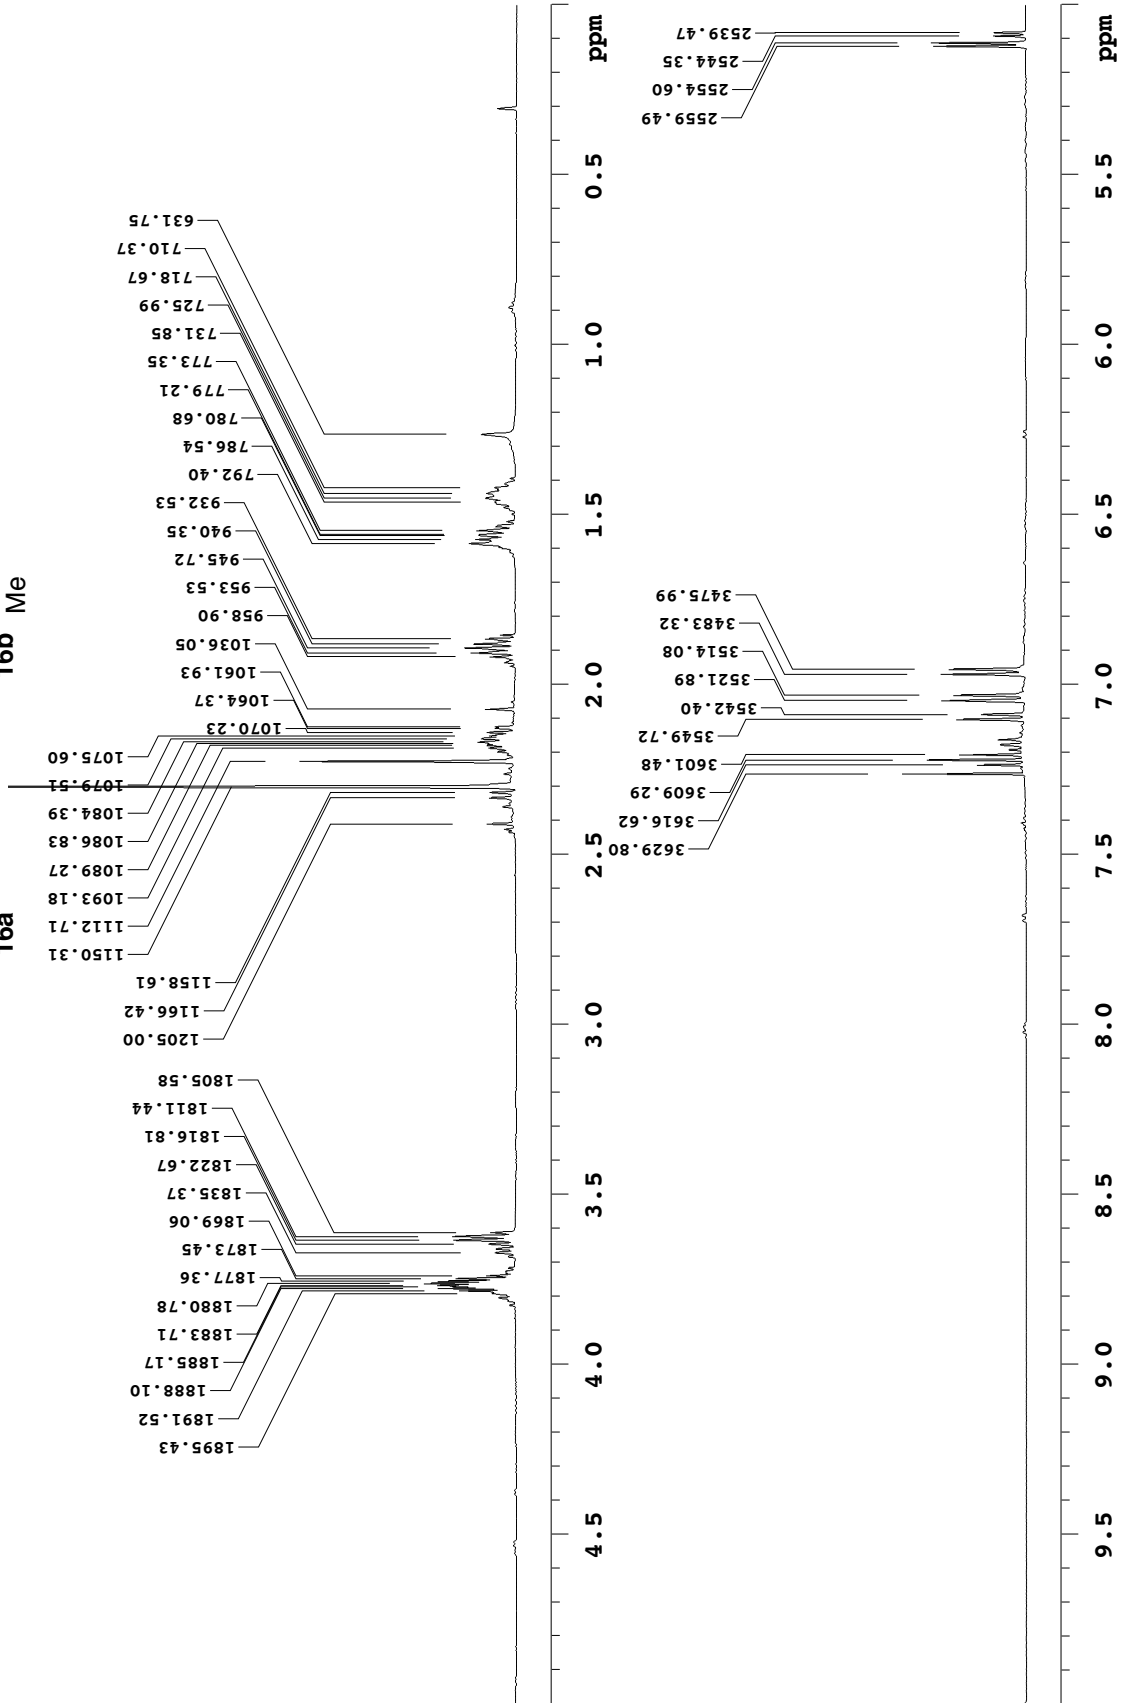

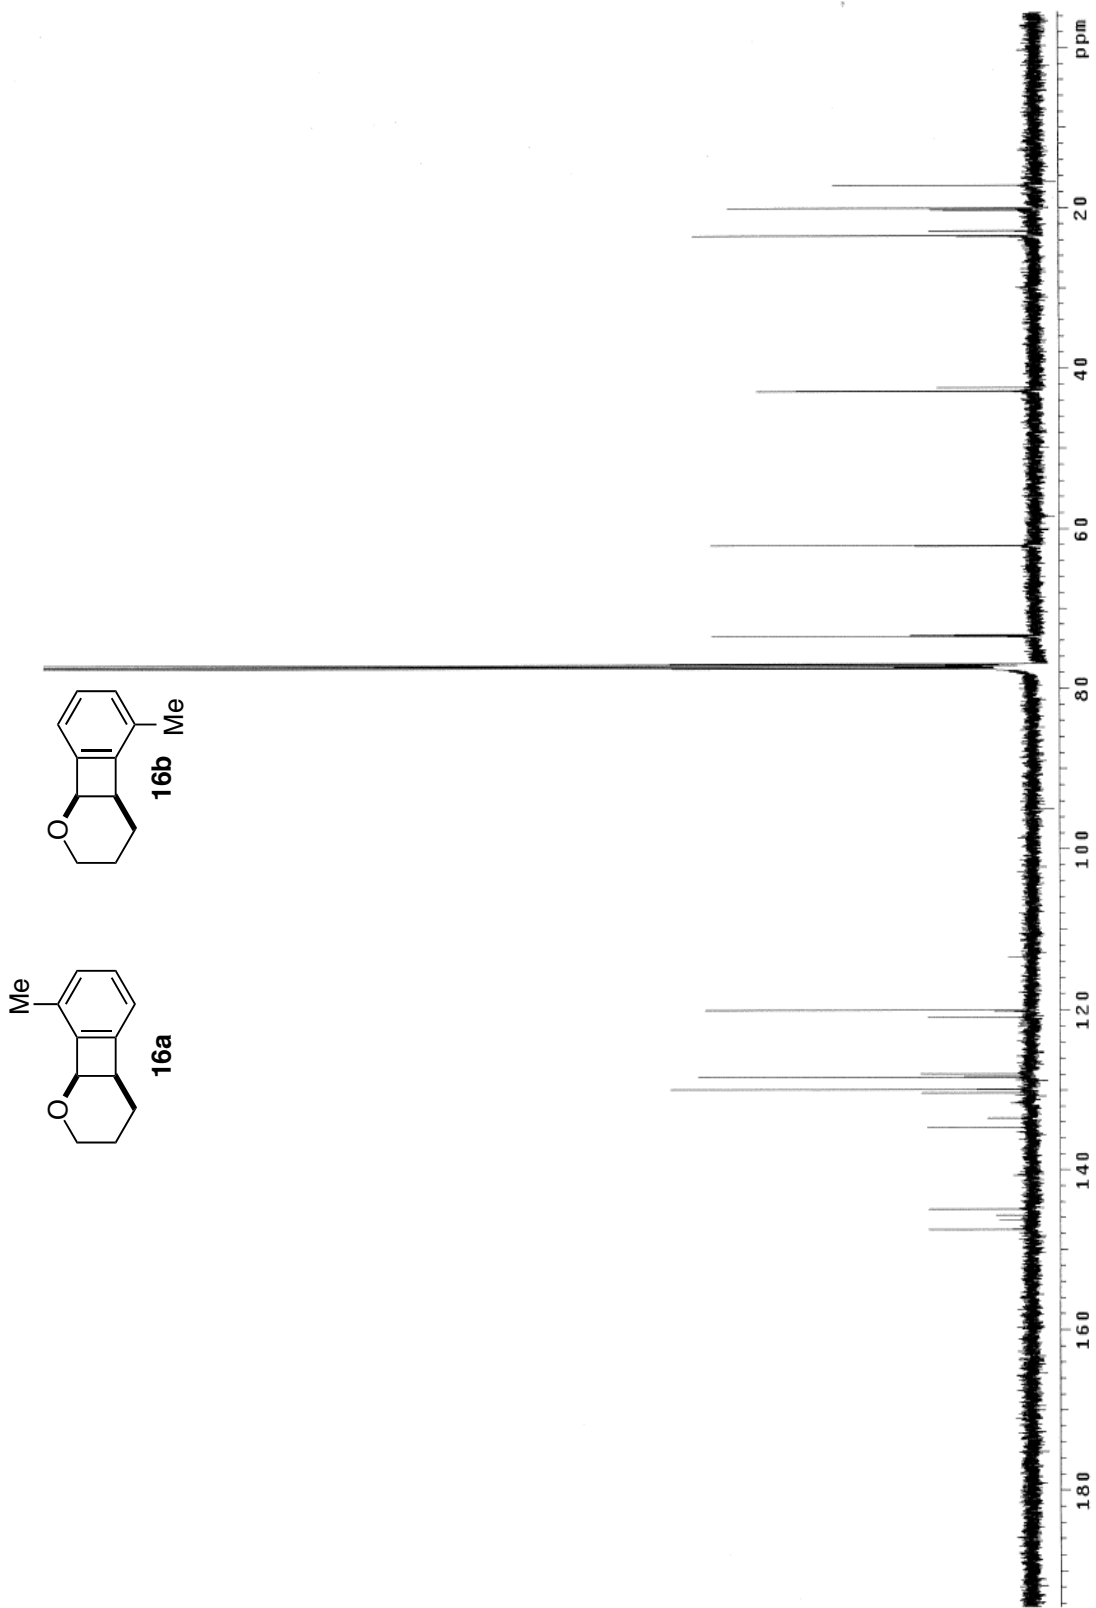

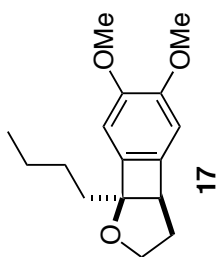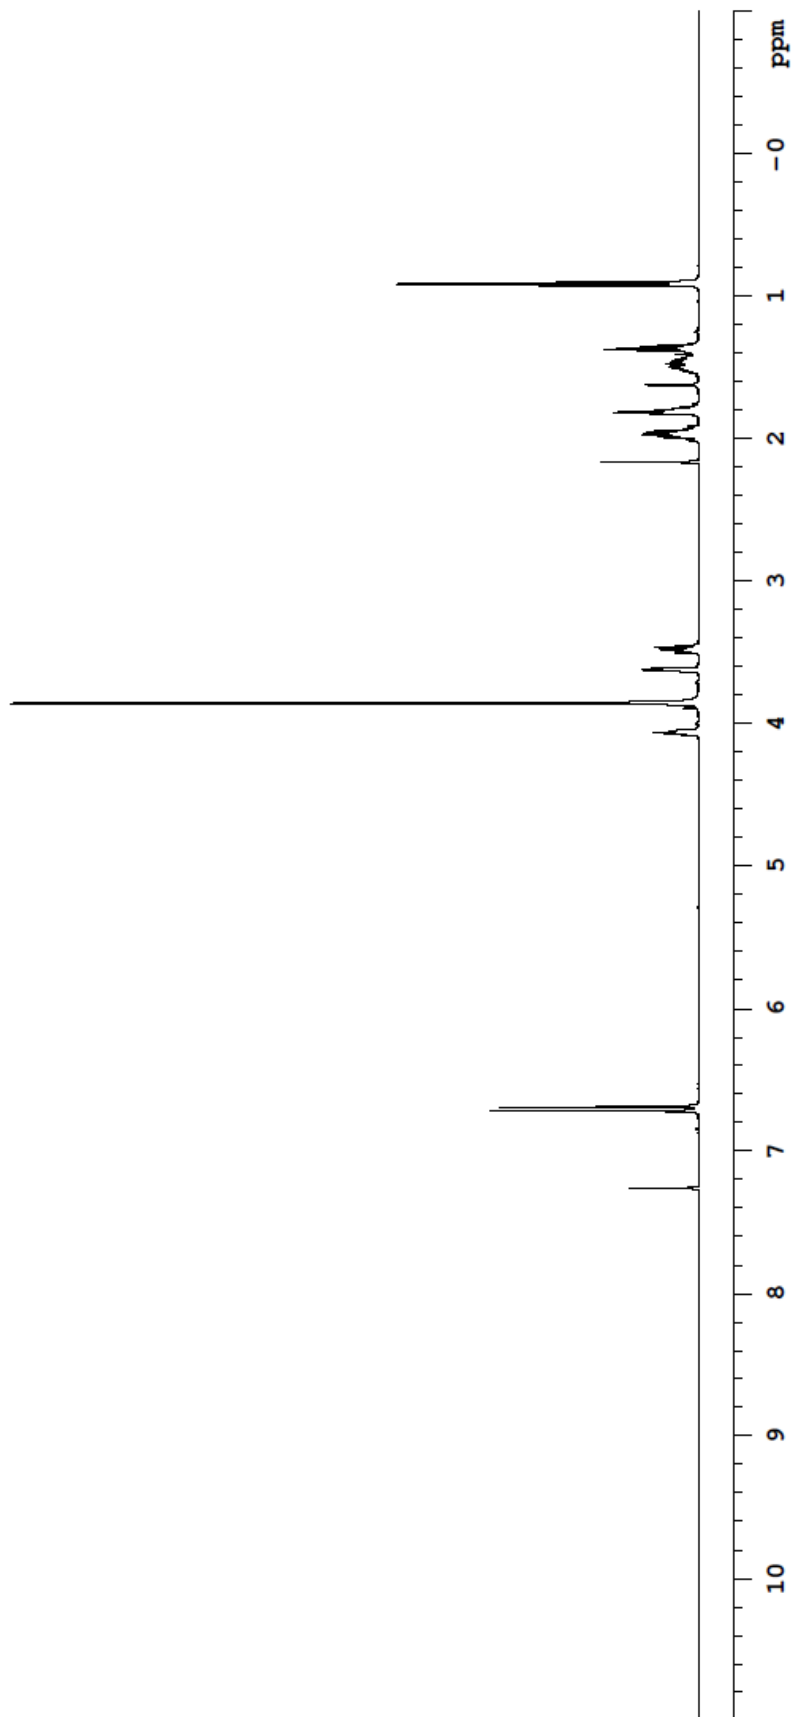



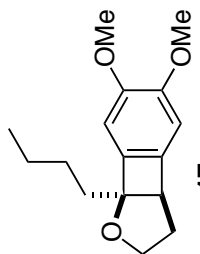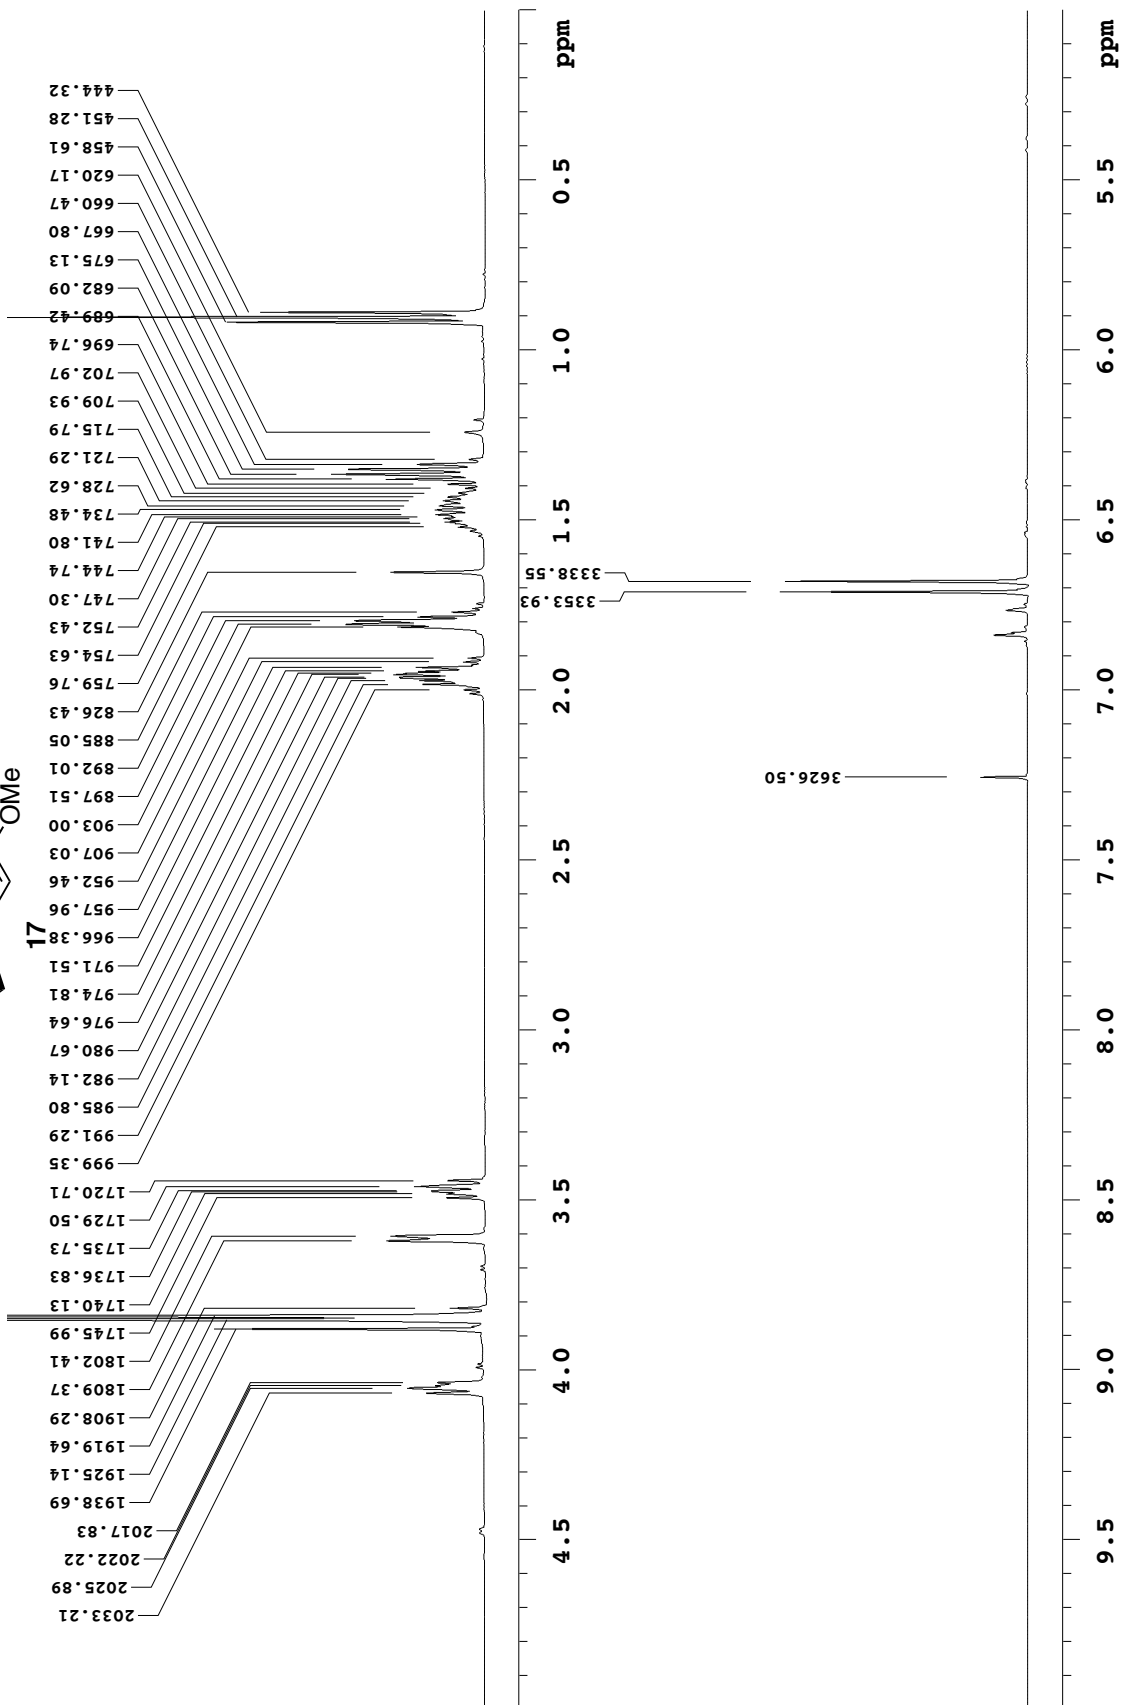

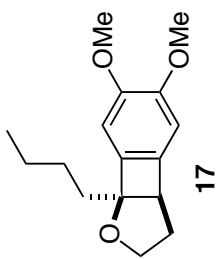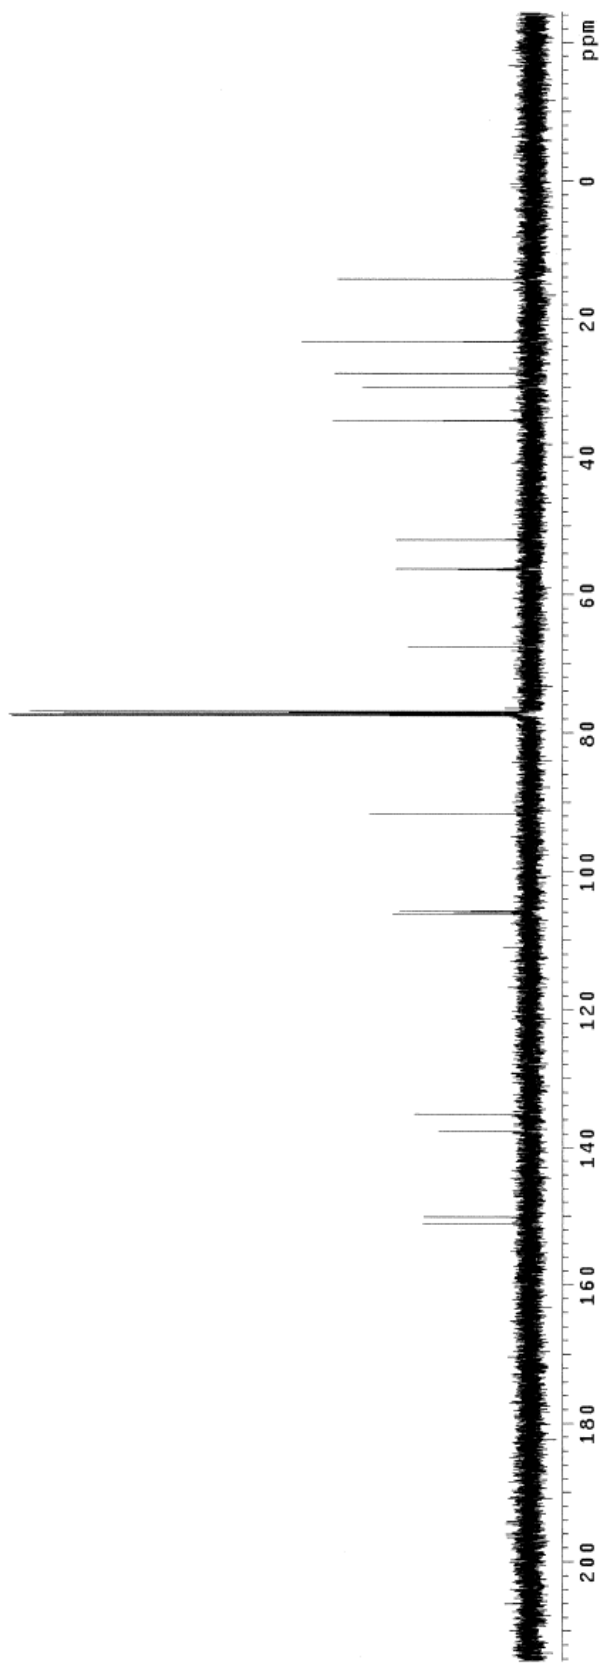

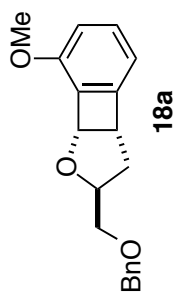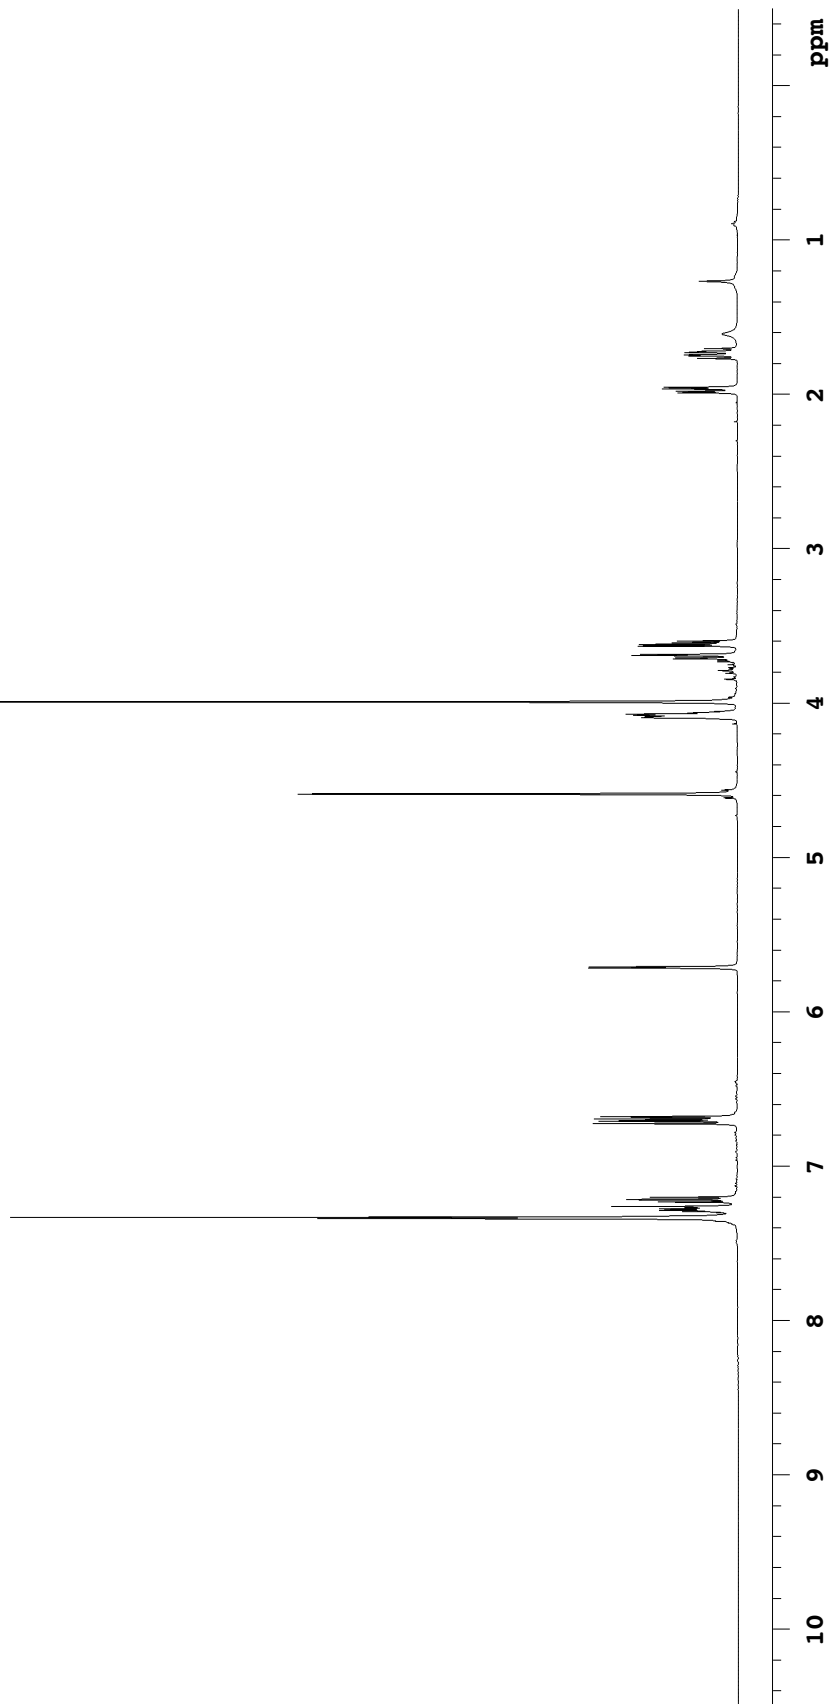

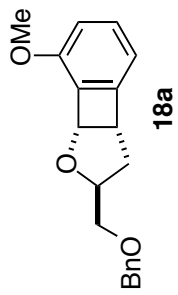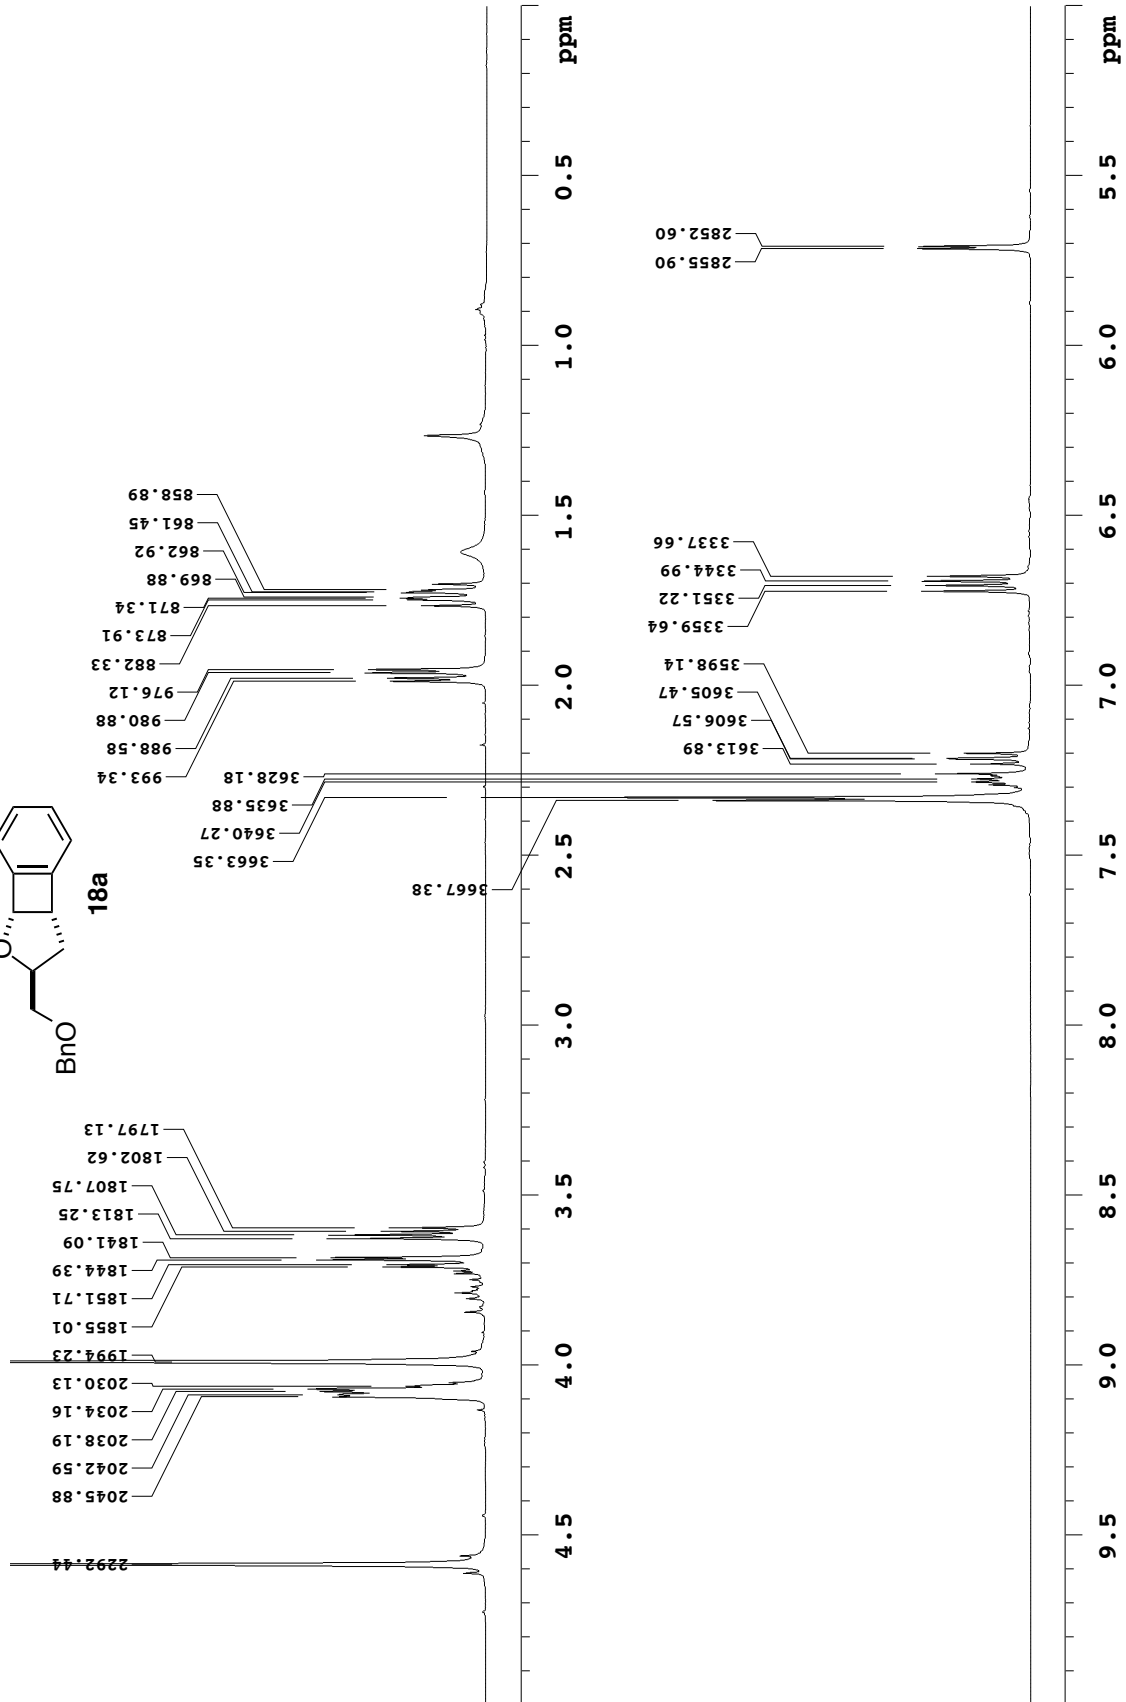

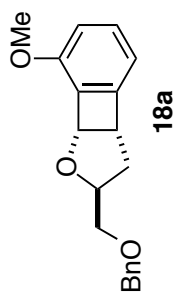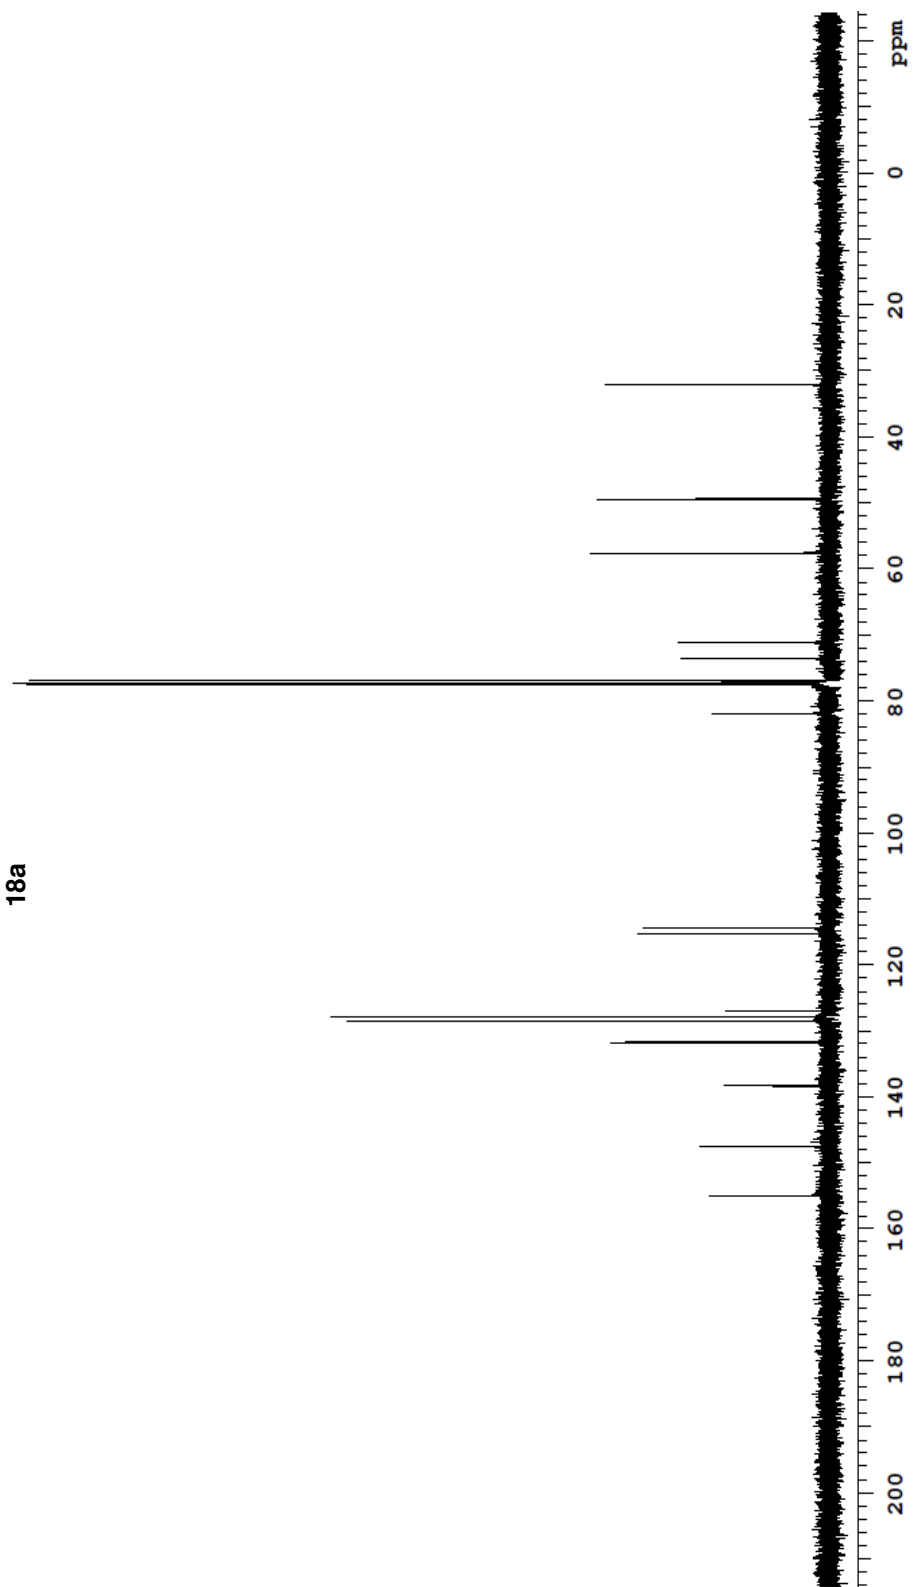

NOESY spectrum of compound **18a** in CDCl<sub>3</sub>

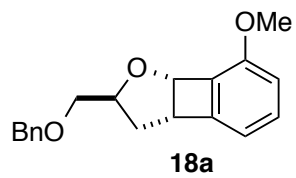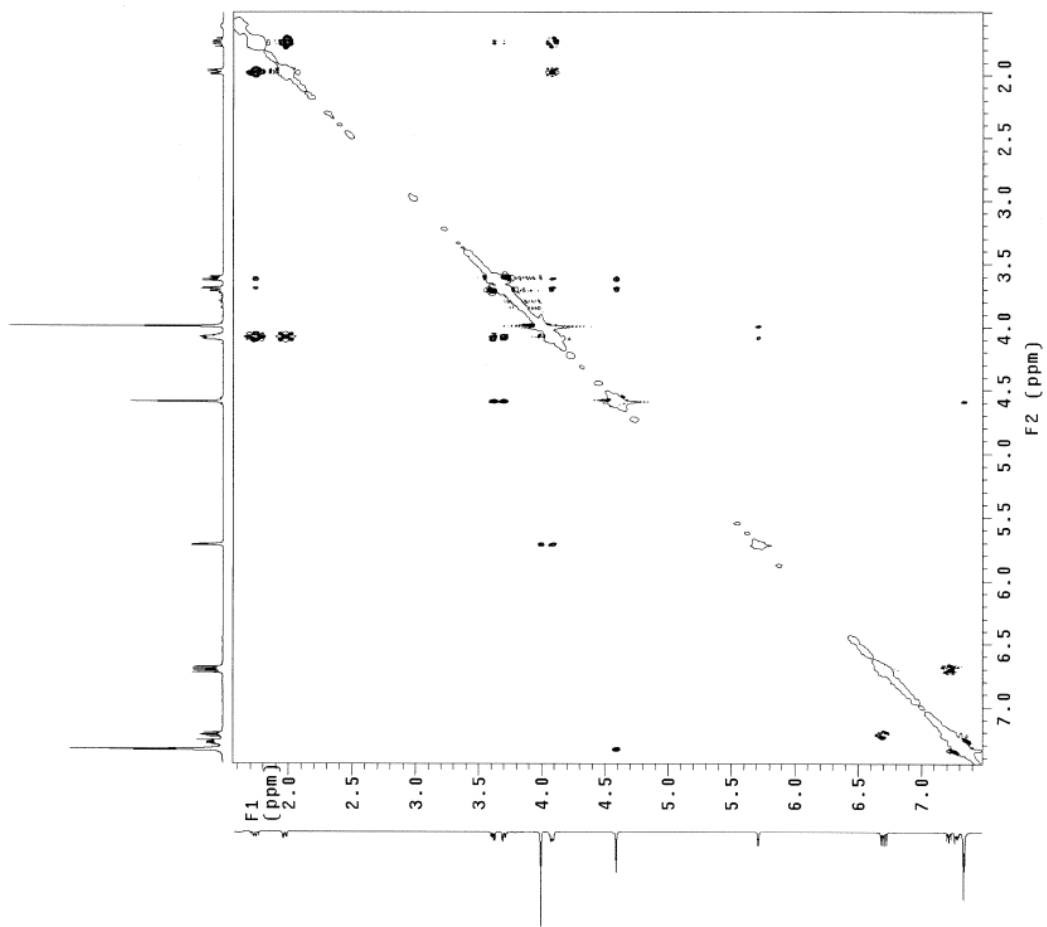

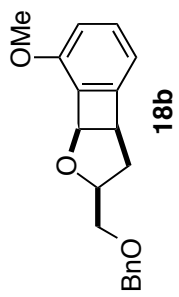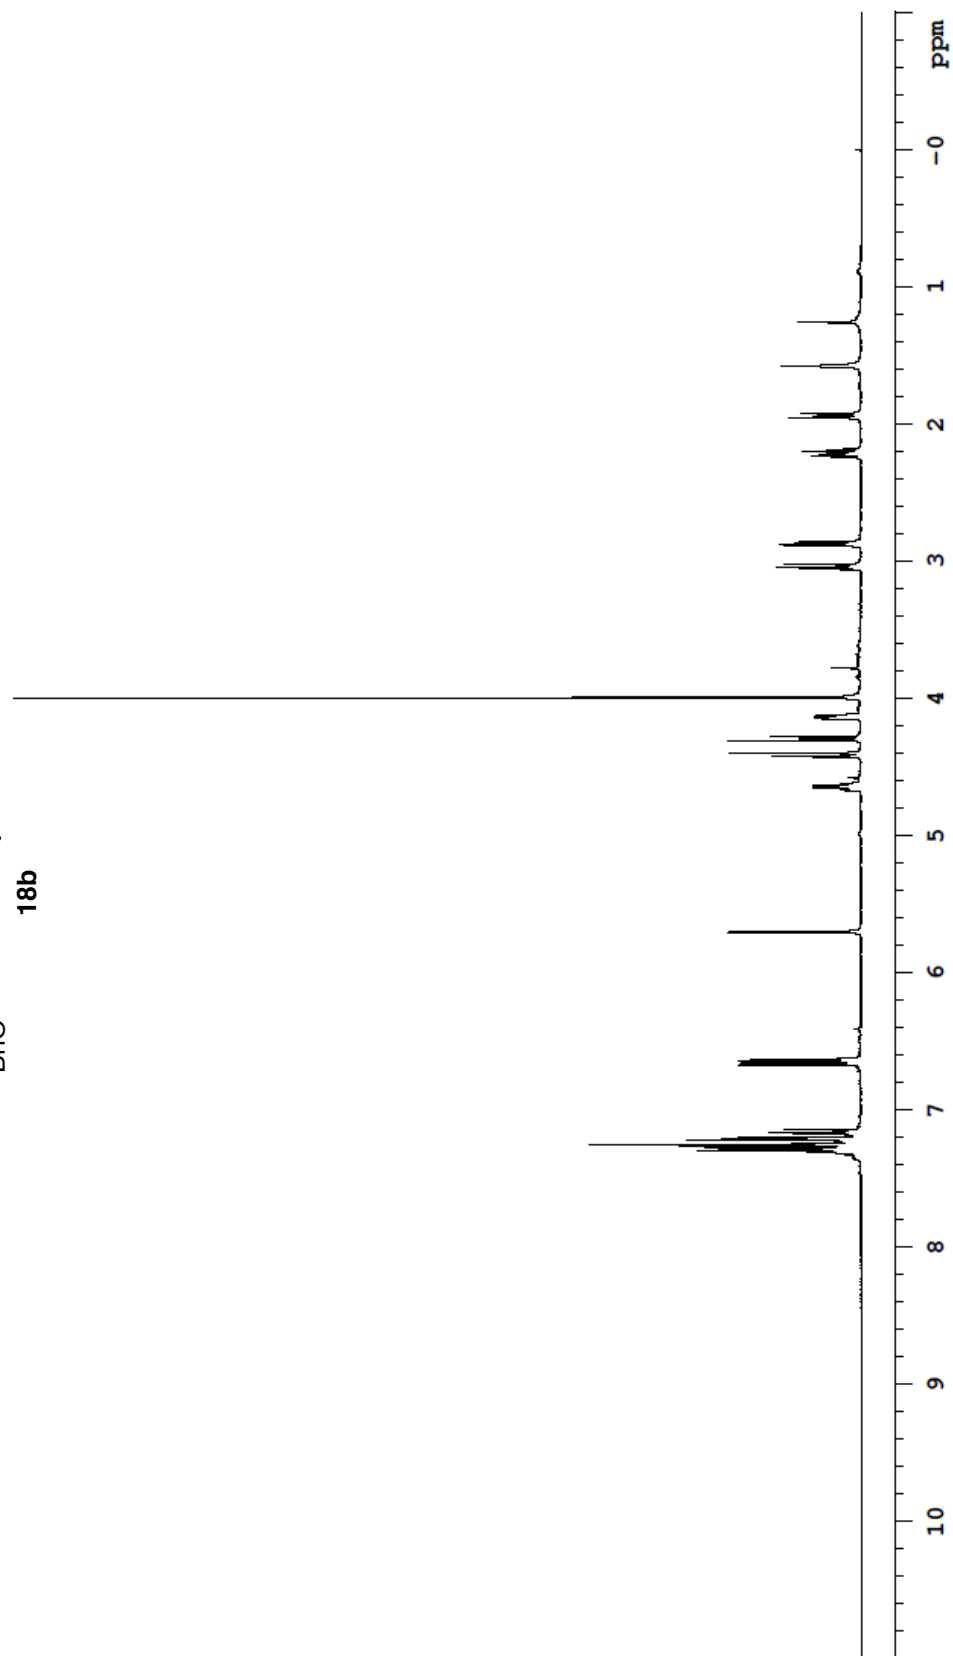

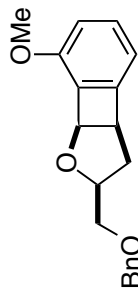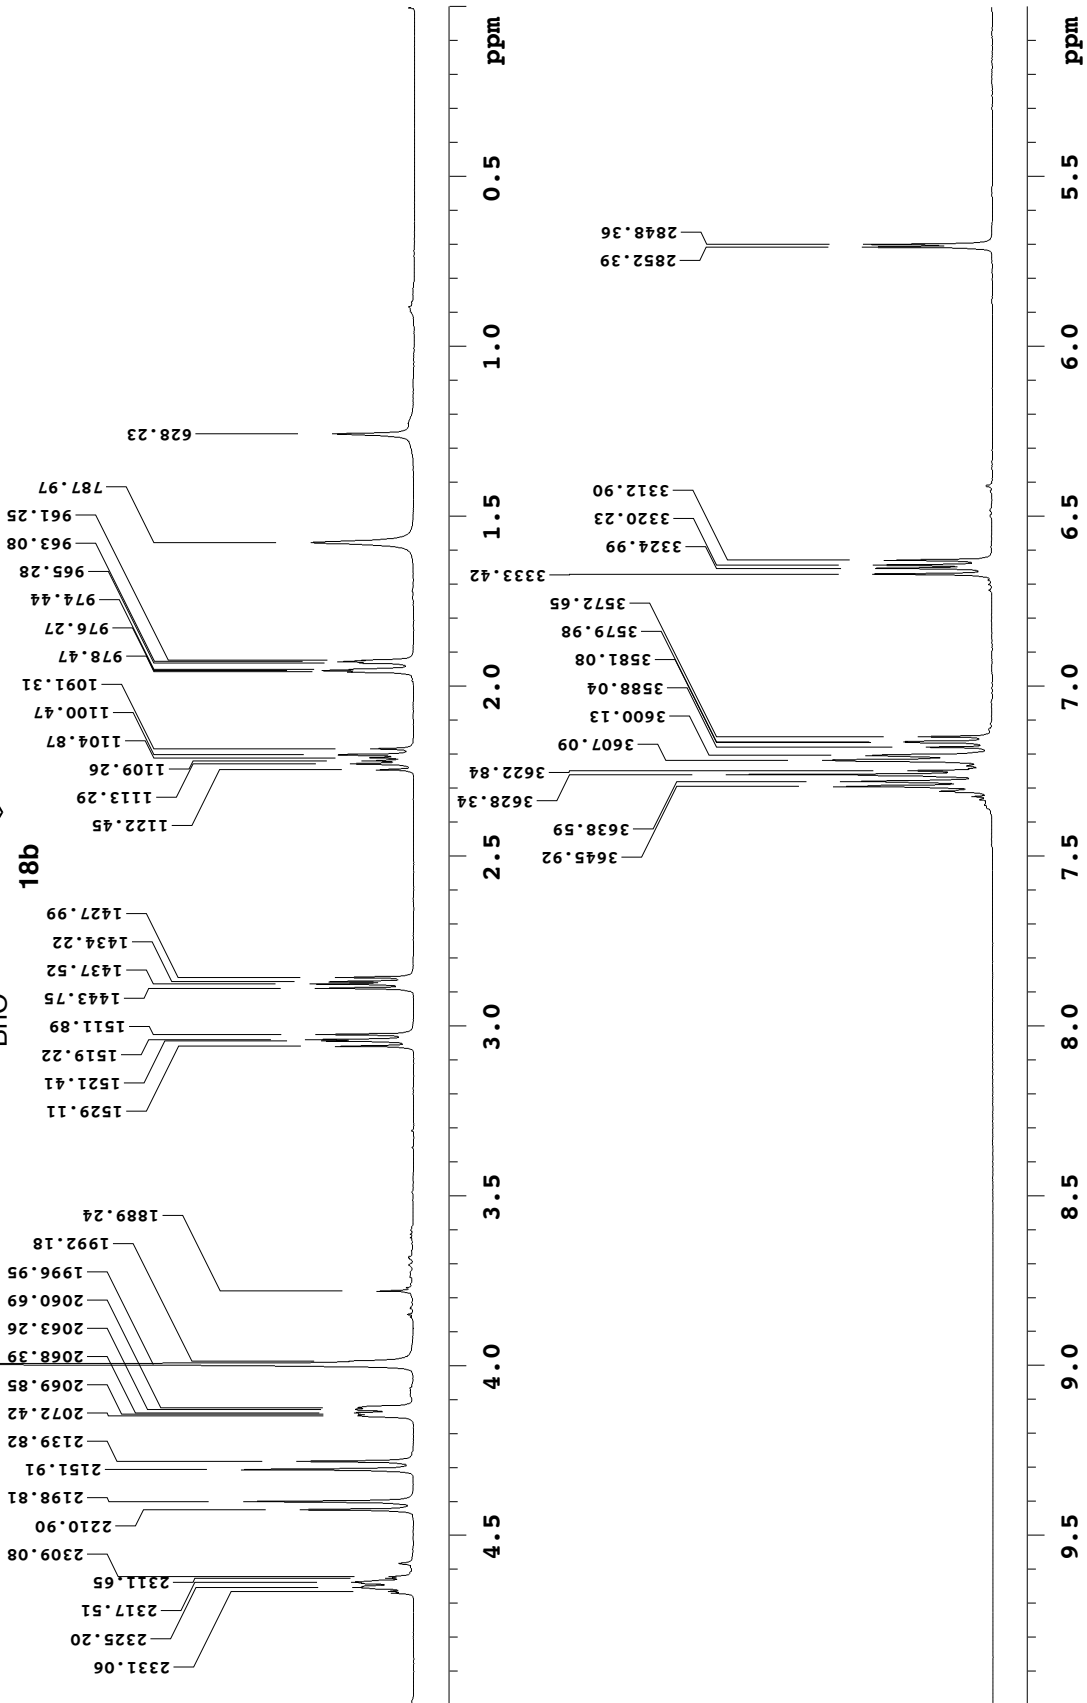



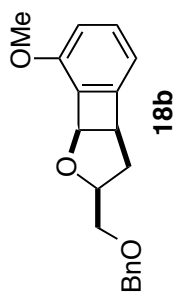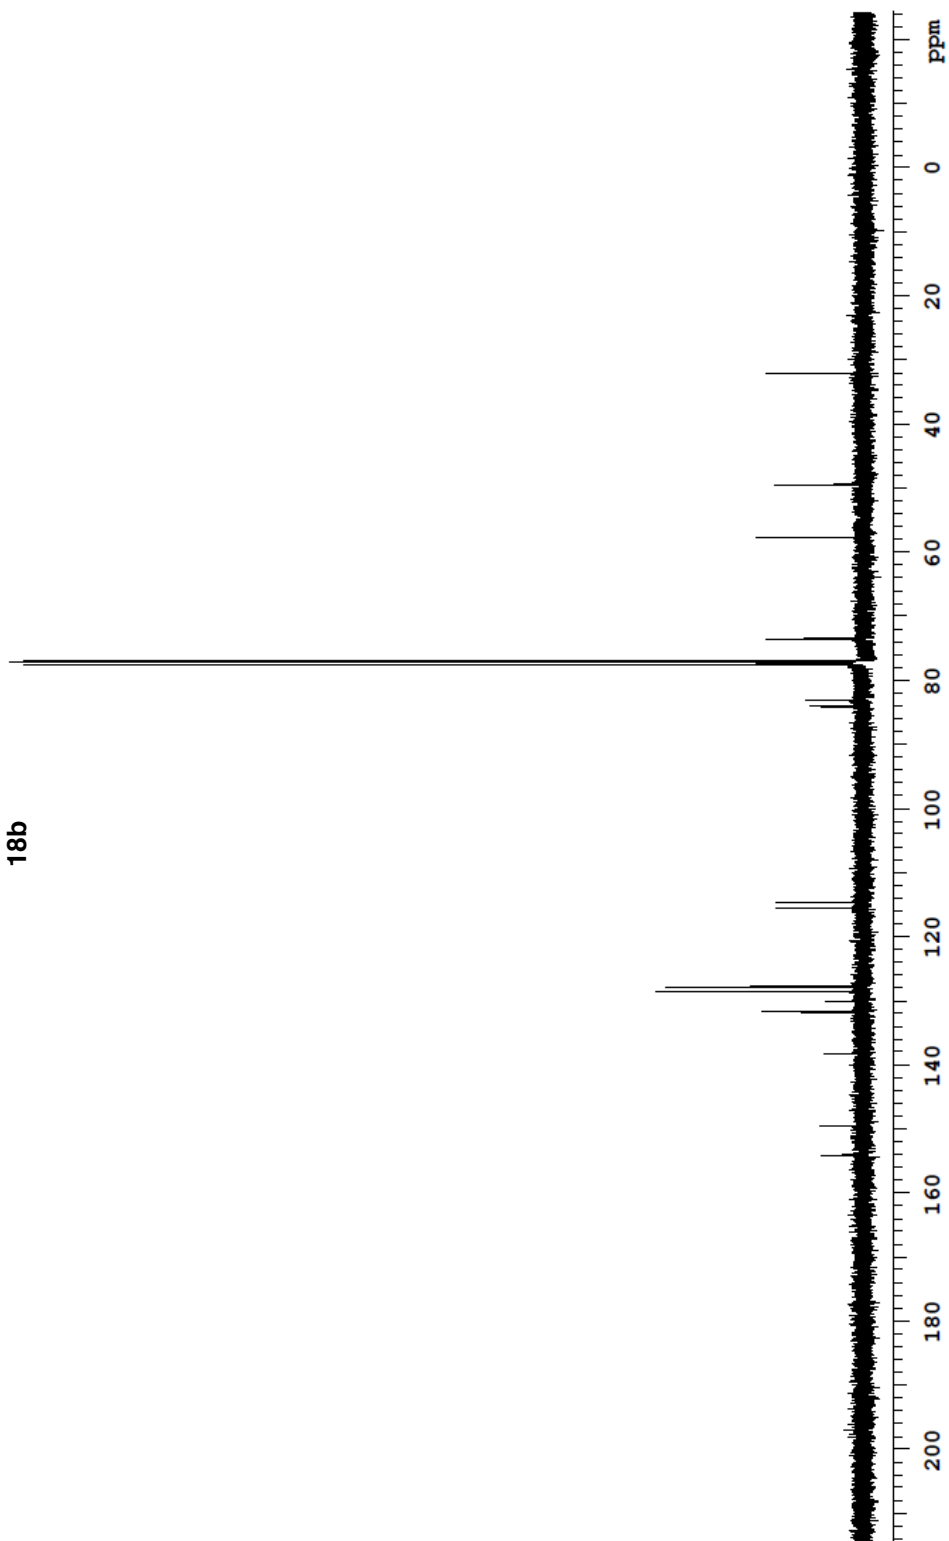

NOESY spectrum of compound **18b** in CDCl<sub>3</sub>

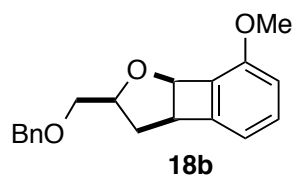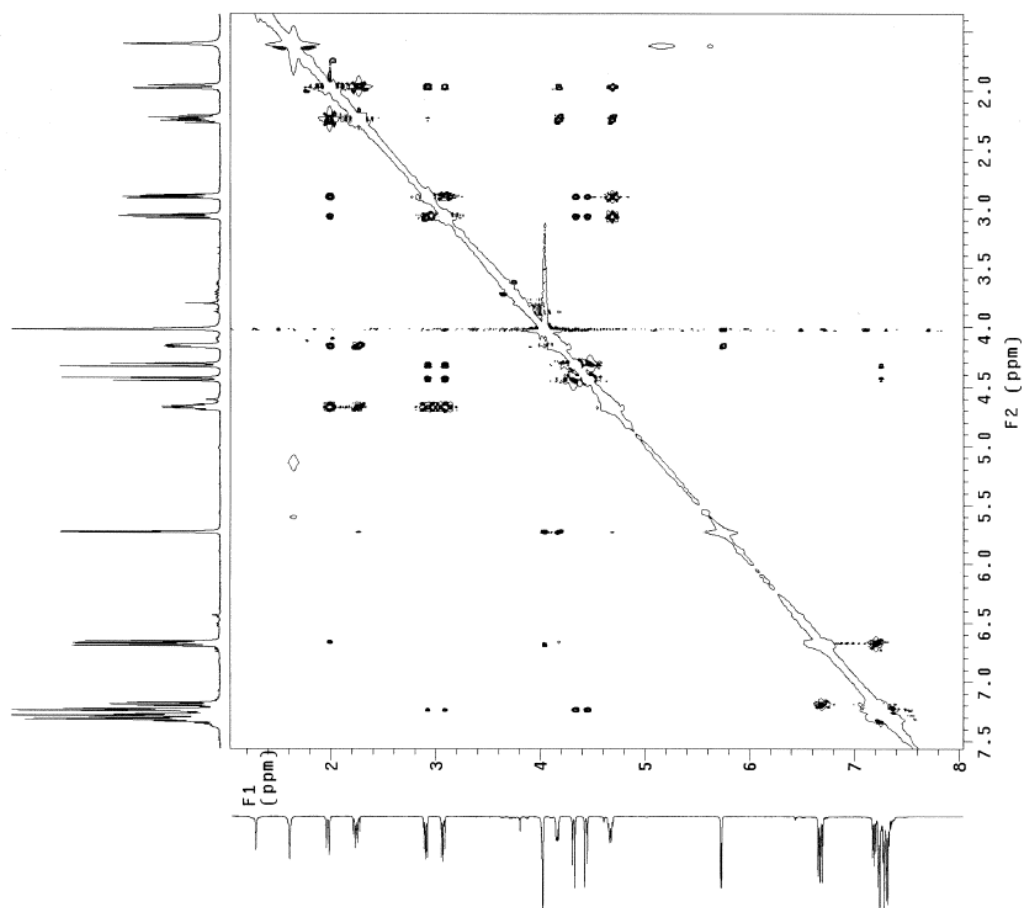

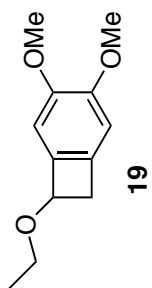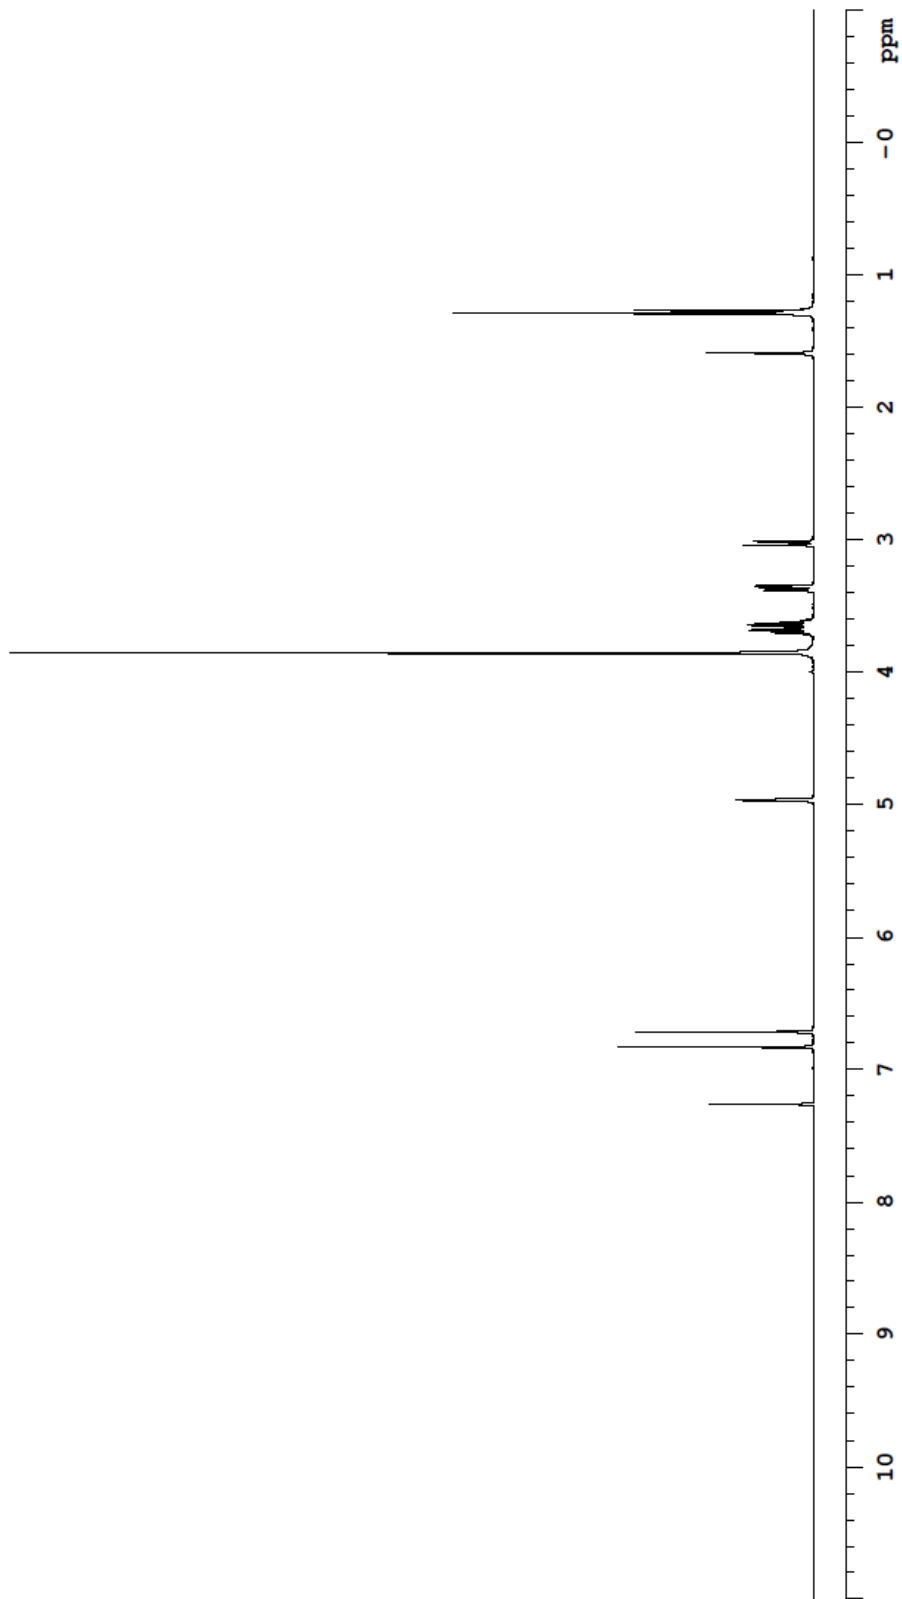

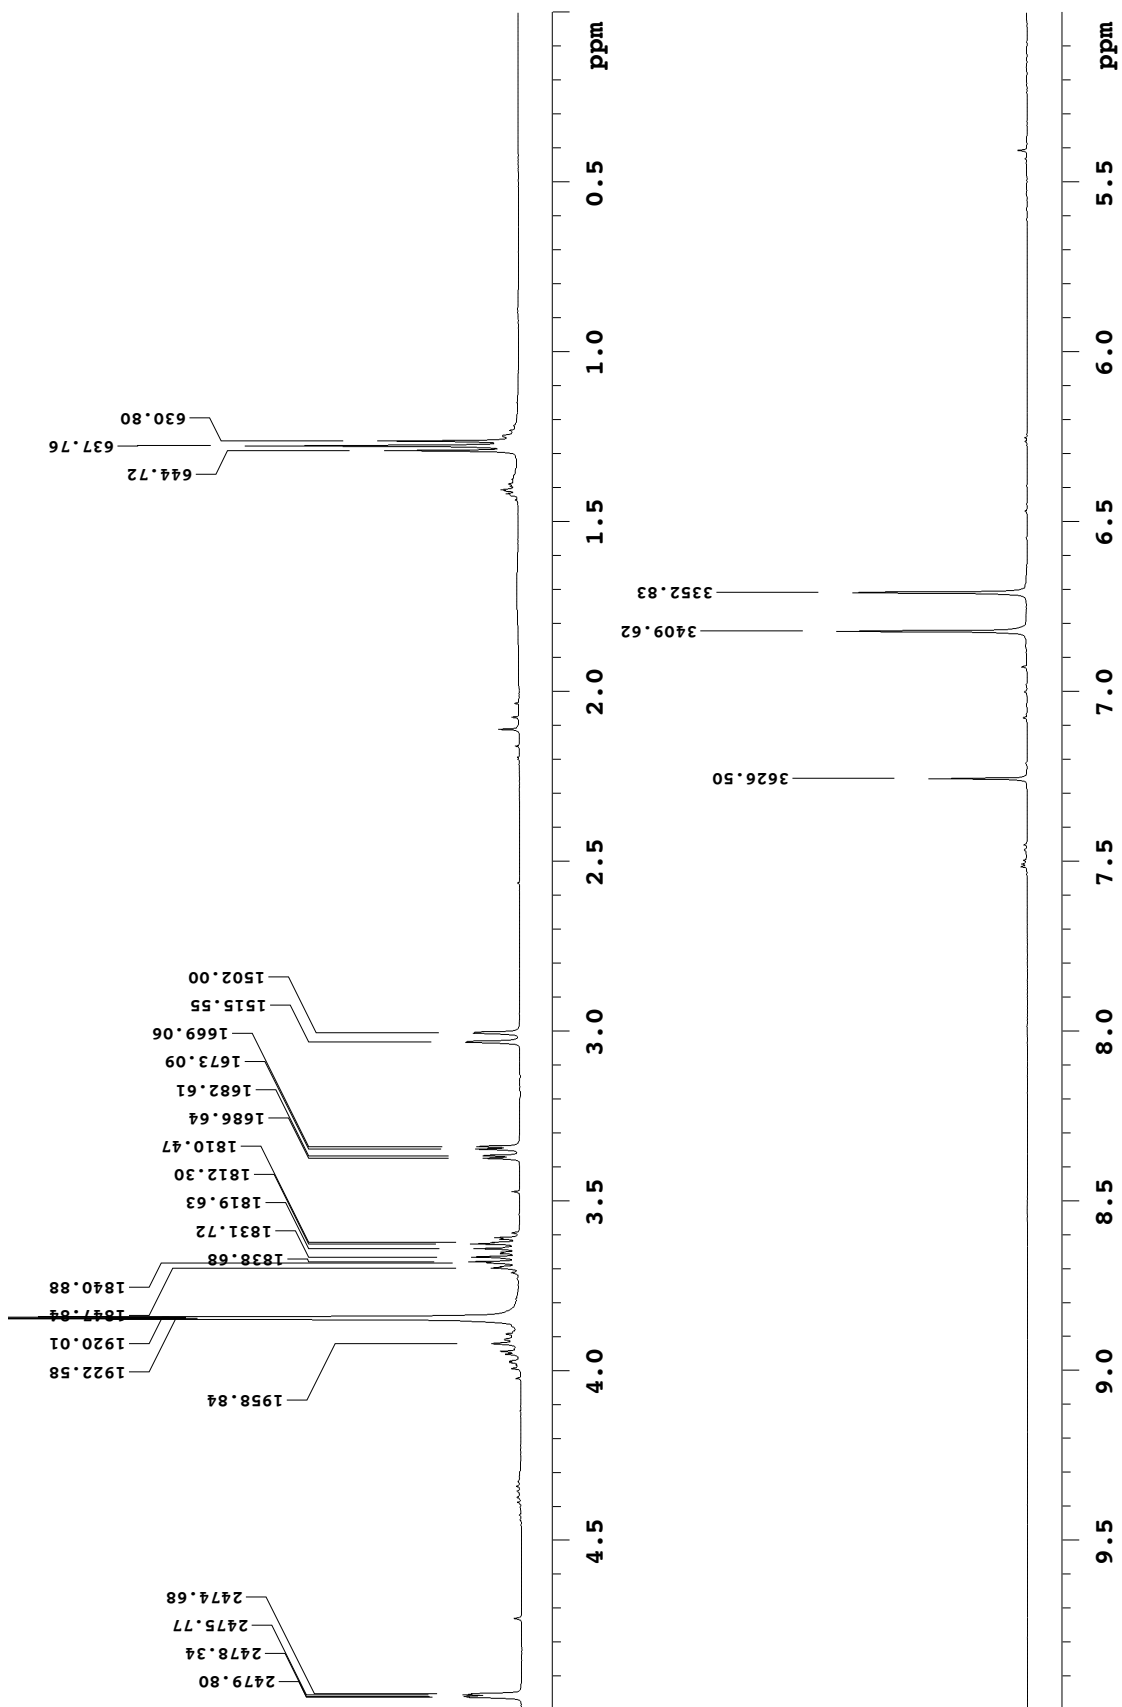

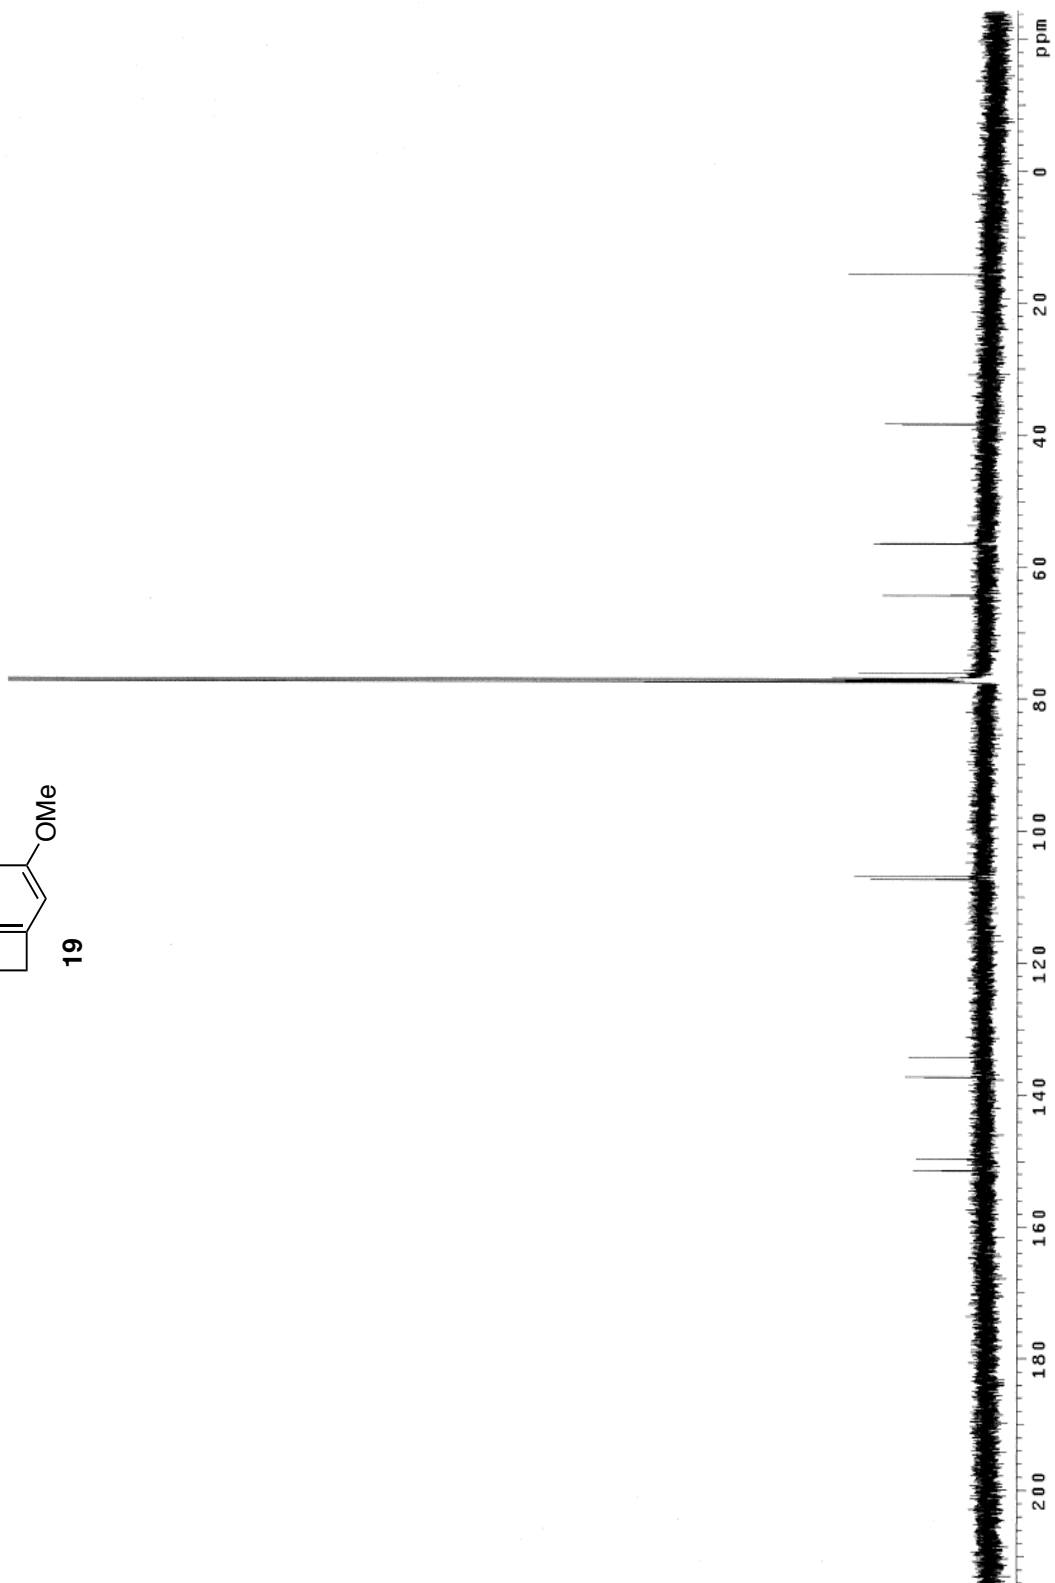

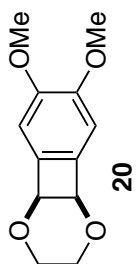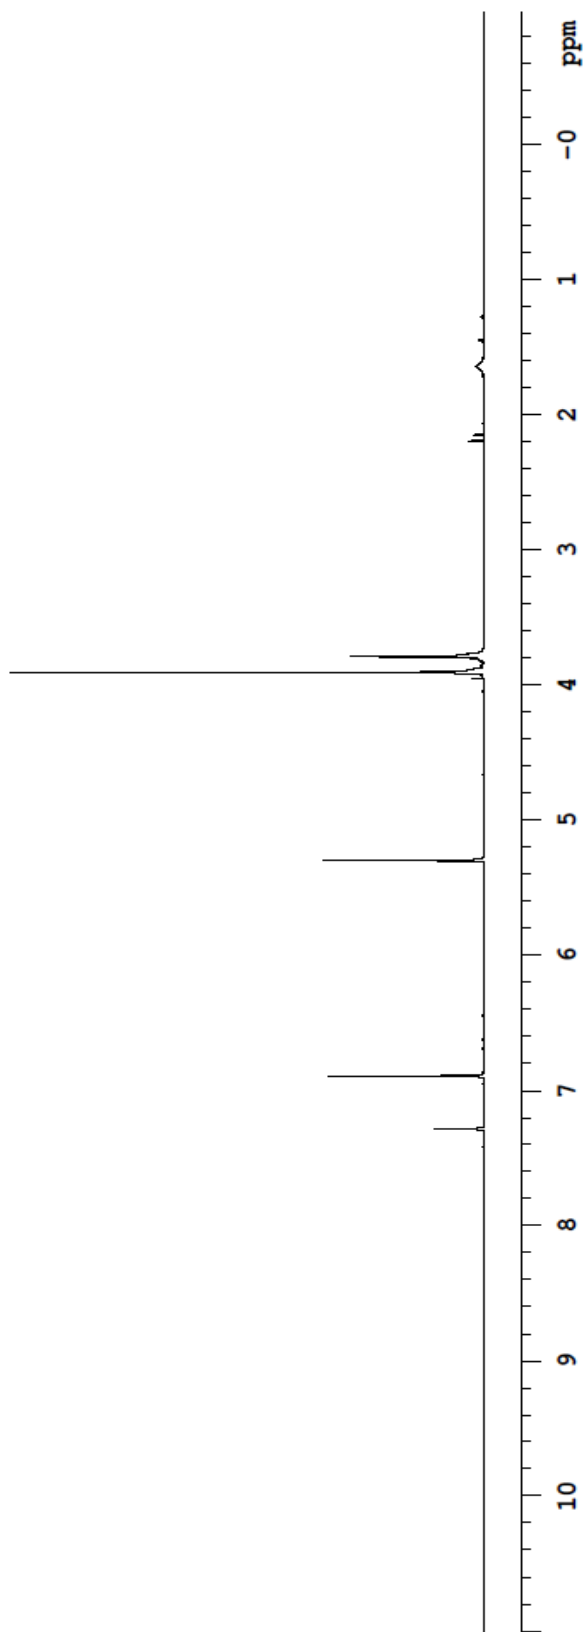

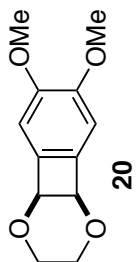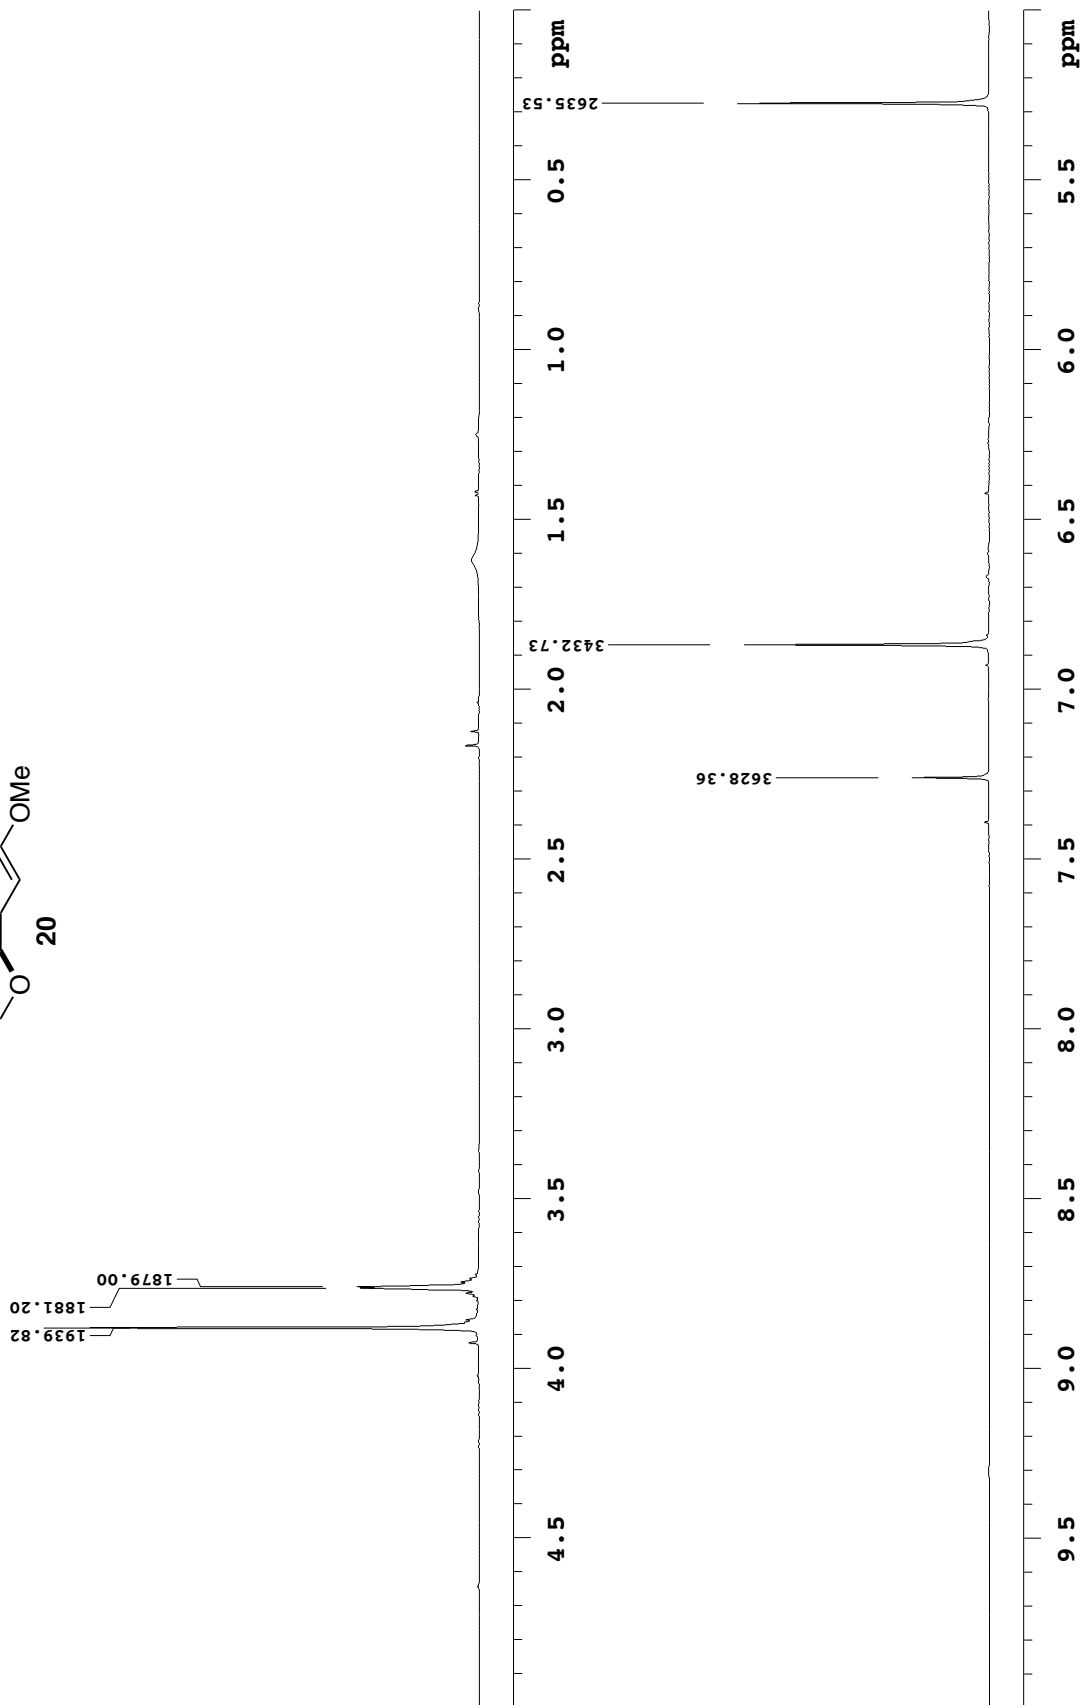

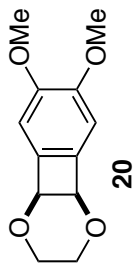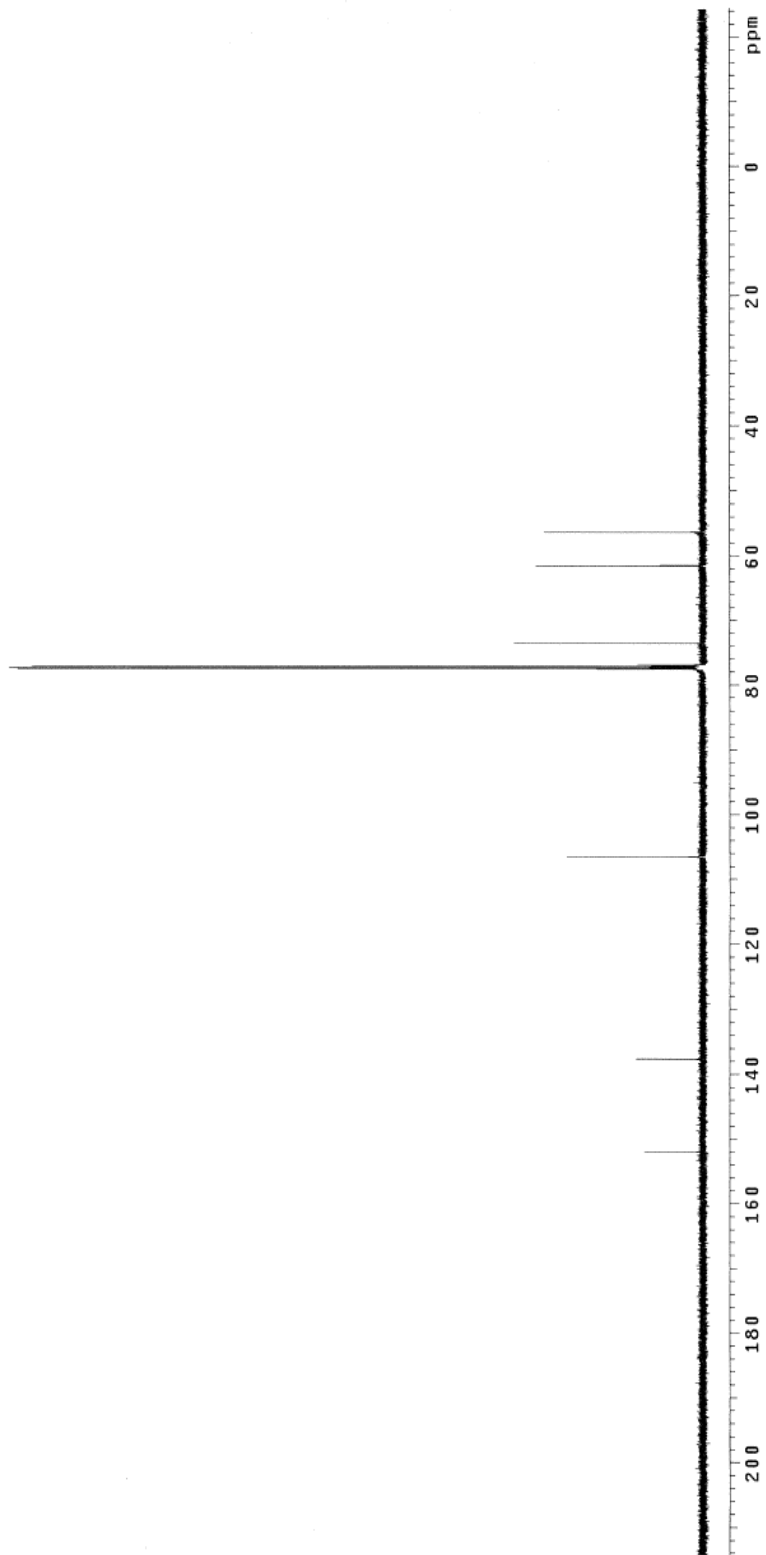



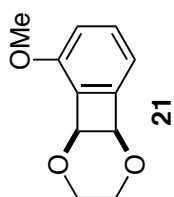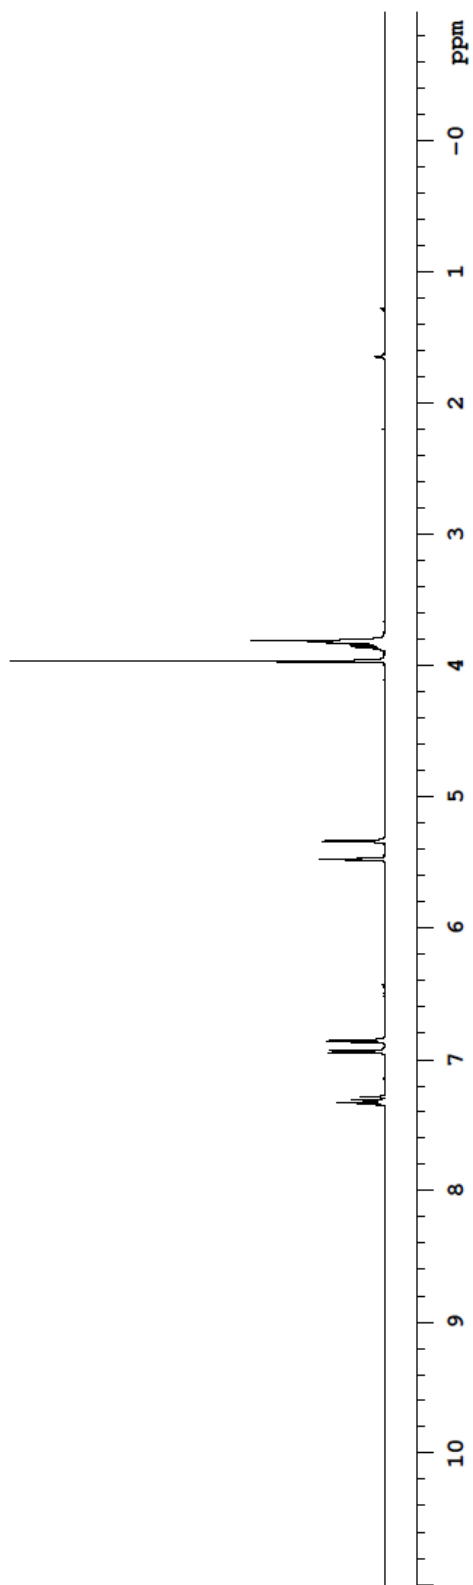

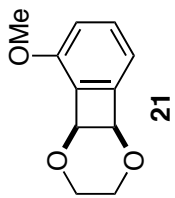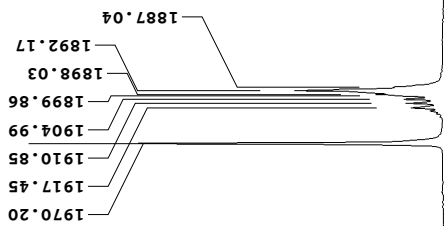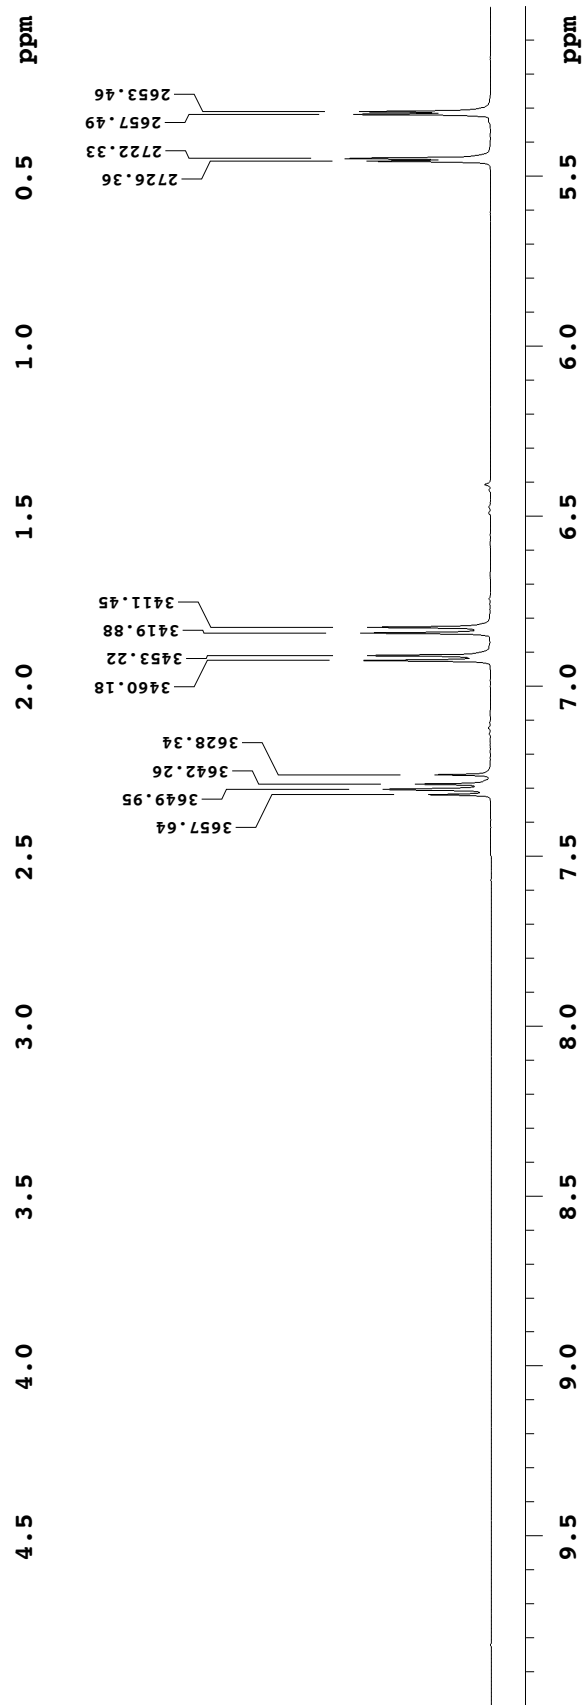

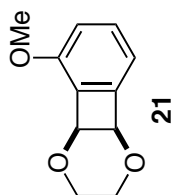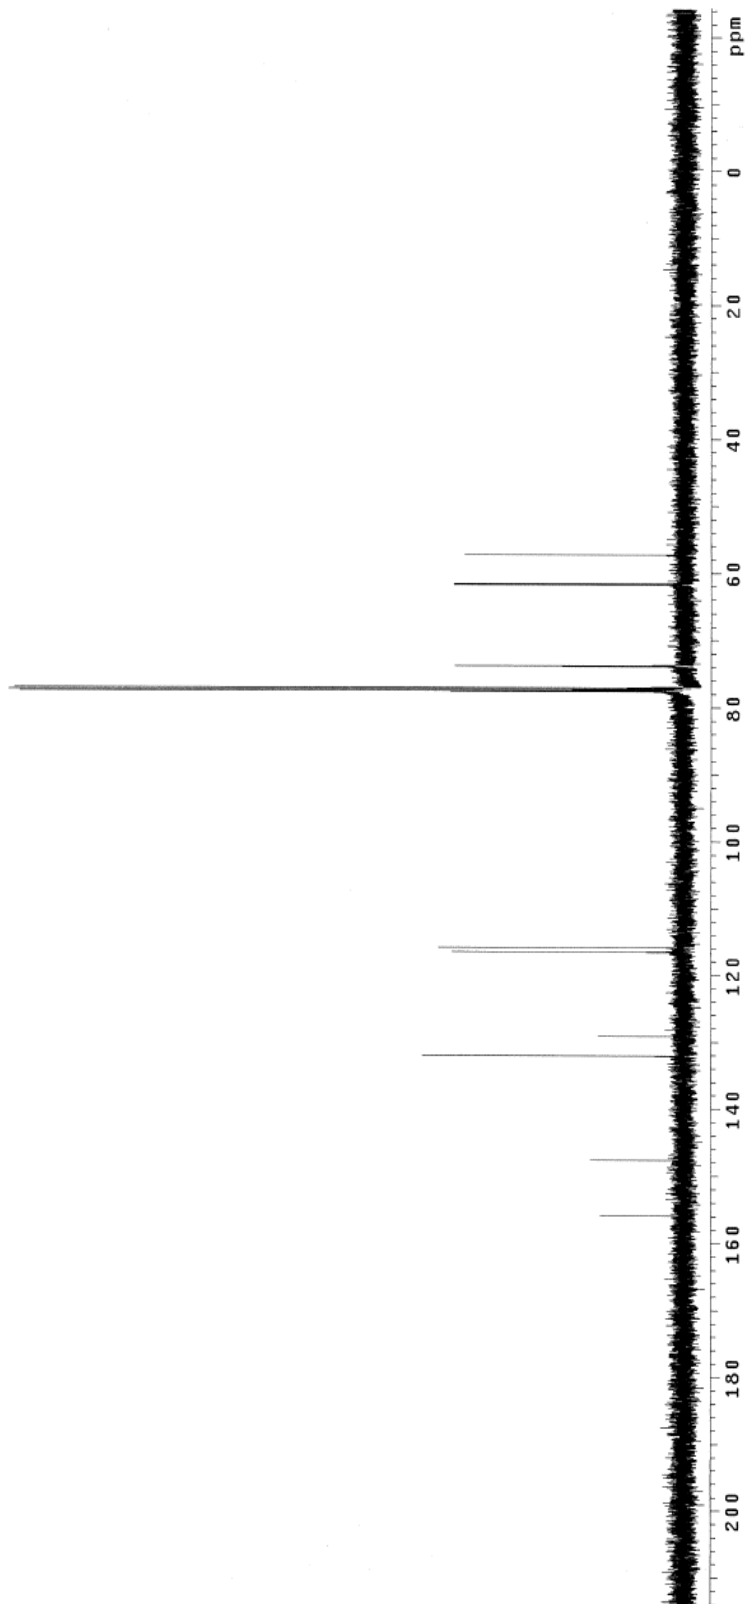

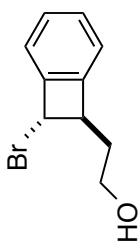

Intermediate *en route*  
to compound **22**

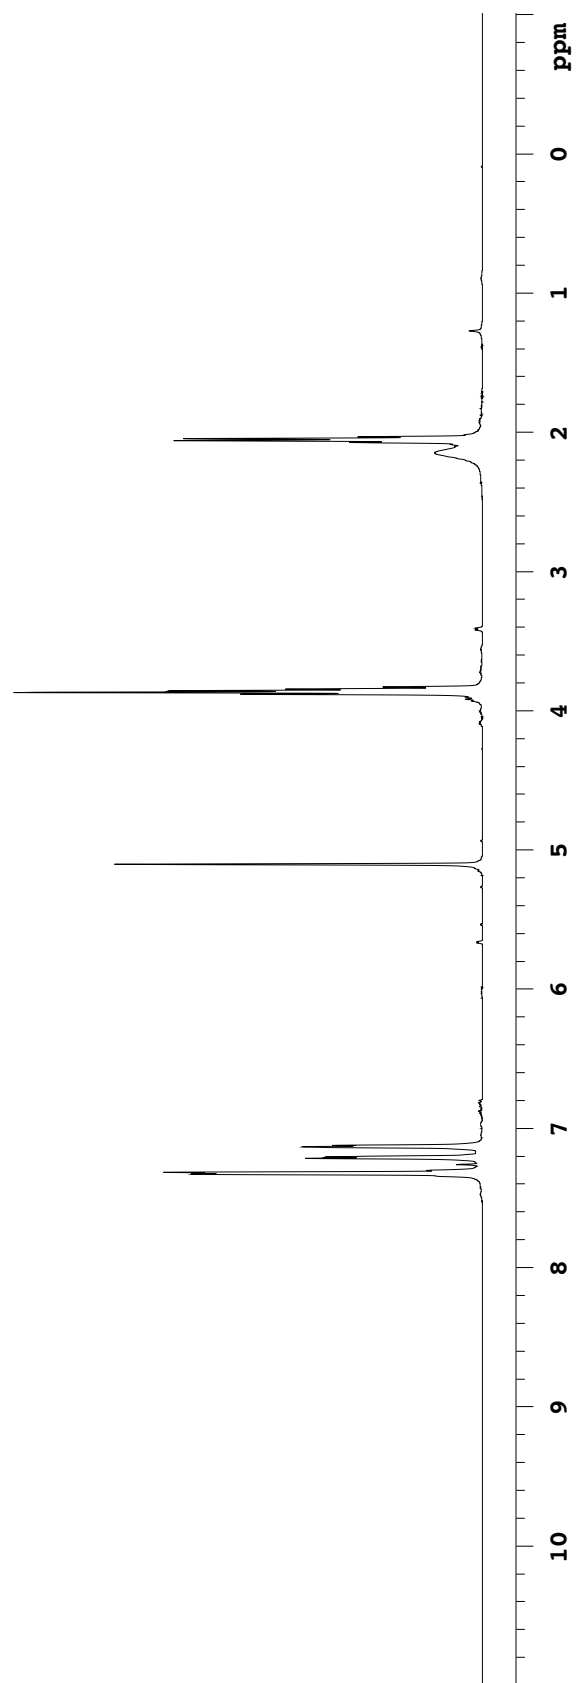

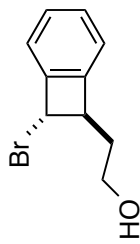

Intermediate *en route*  
to compound **22**

1938.70  
1932.36  
1926.50  
1920.16  
1912.35

1071.95  
1034.37  
1028.03  
1020.71  
1014.36

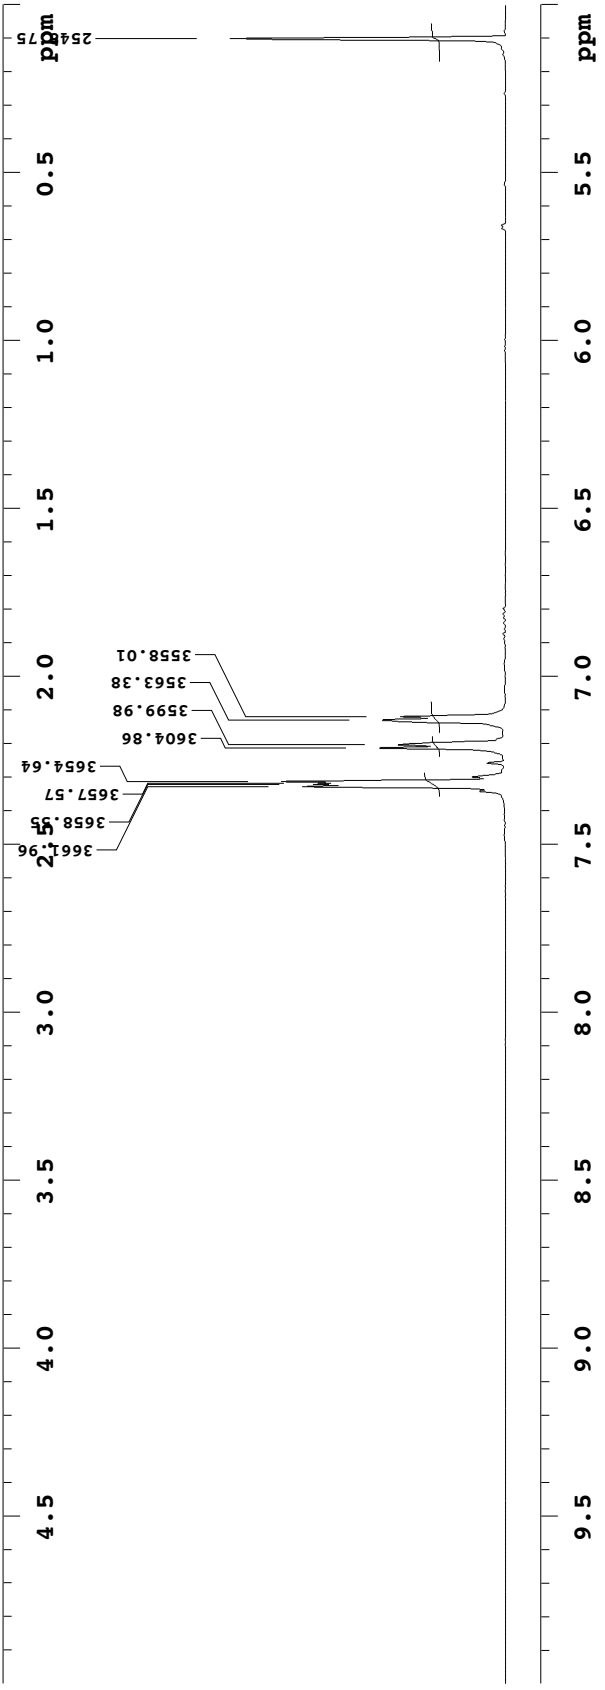

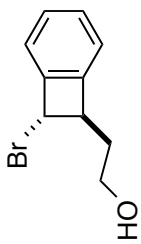

Intermediate *en route*  
to compound **22**

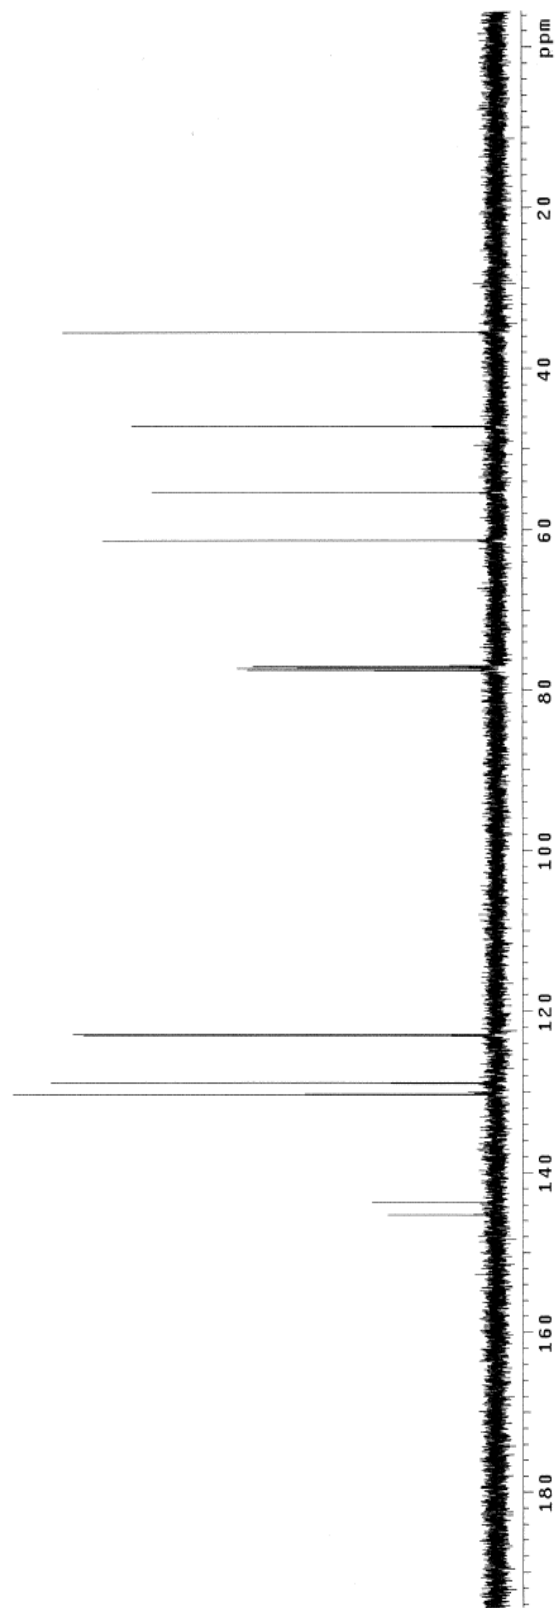

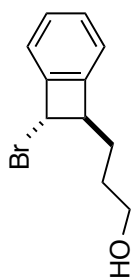

Intermediate *en route*  
to compound **23**

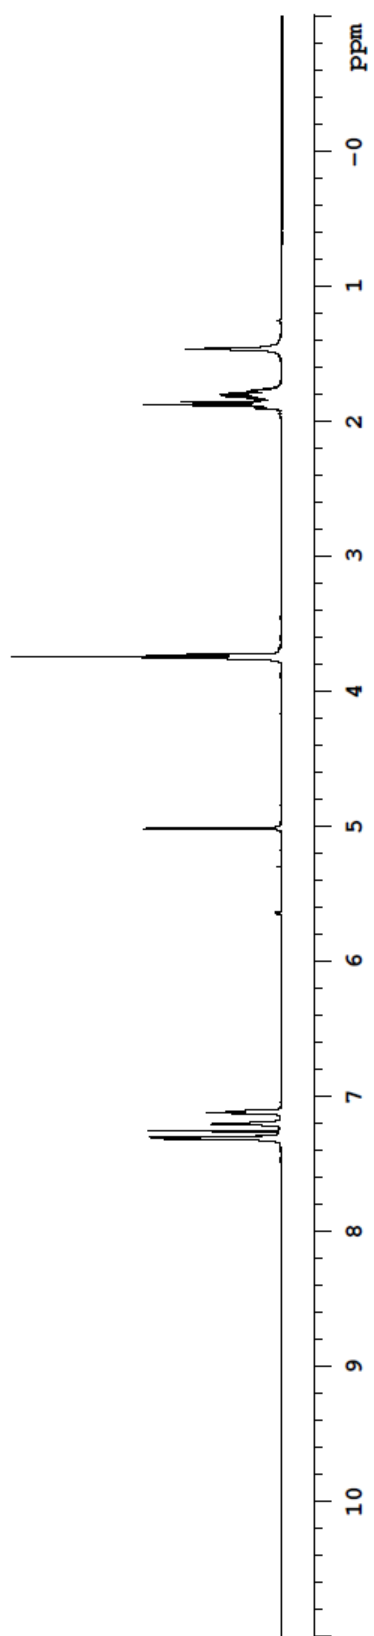

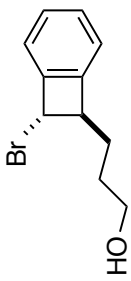

Intermediate *en route*  
to compound **23**

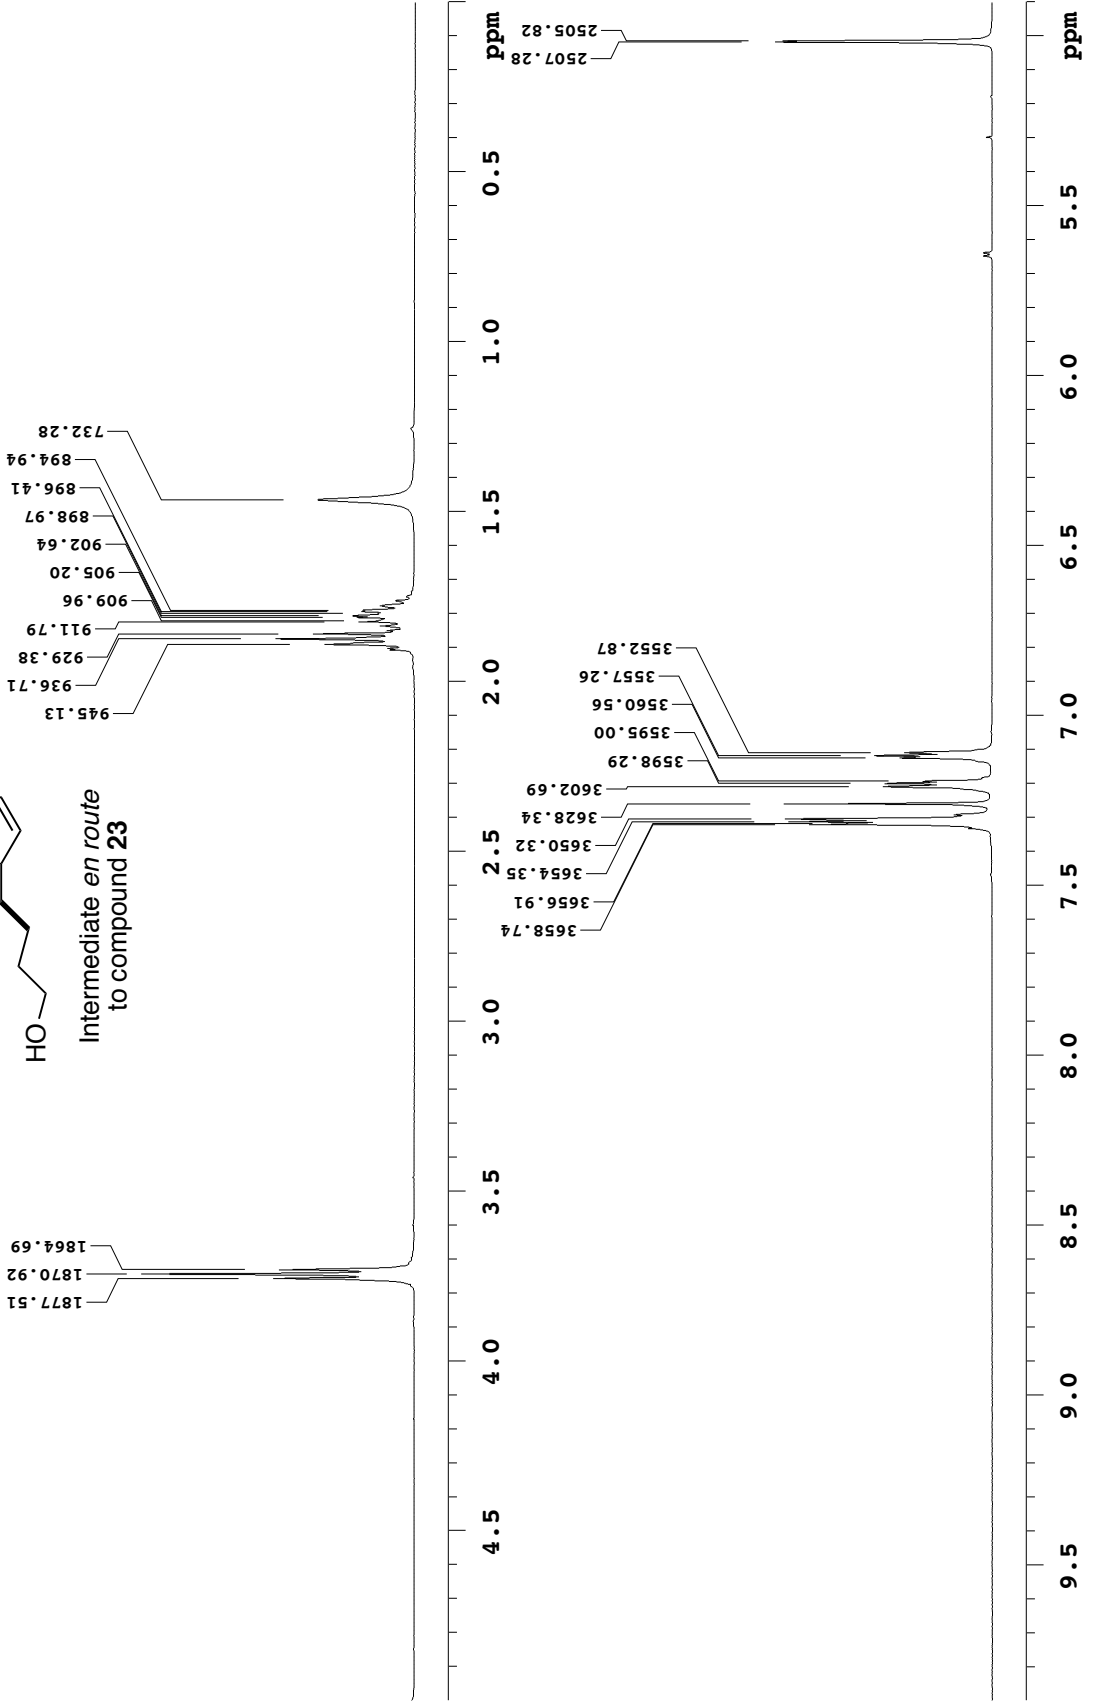



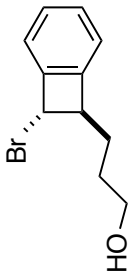

Intermediate *en route*  
to compound **23**

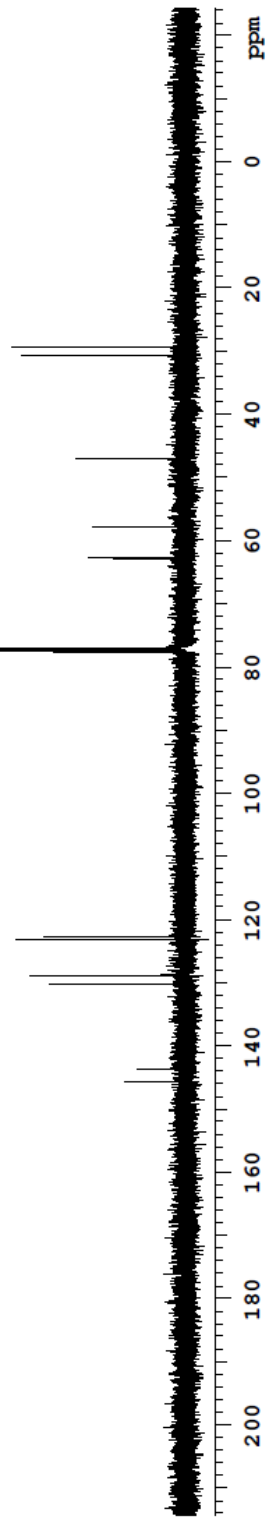

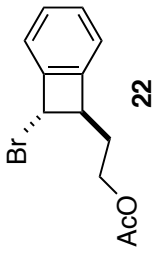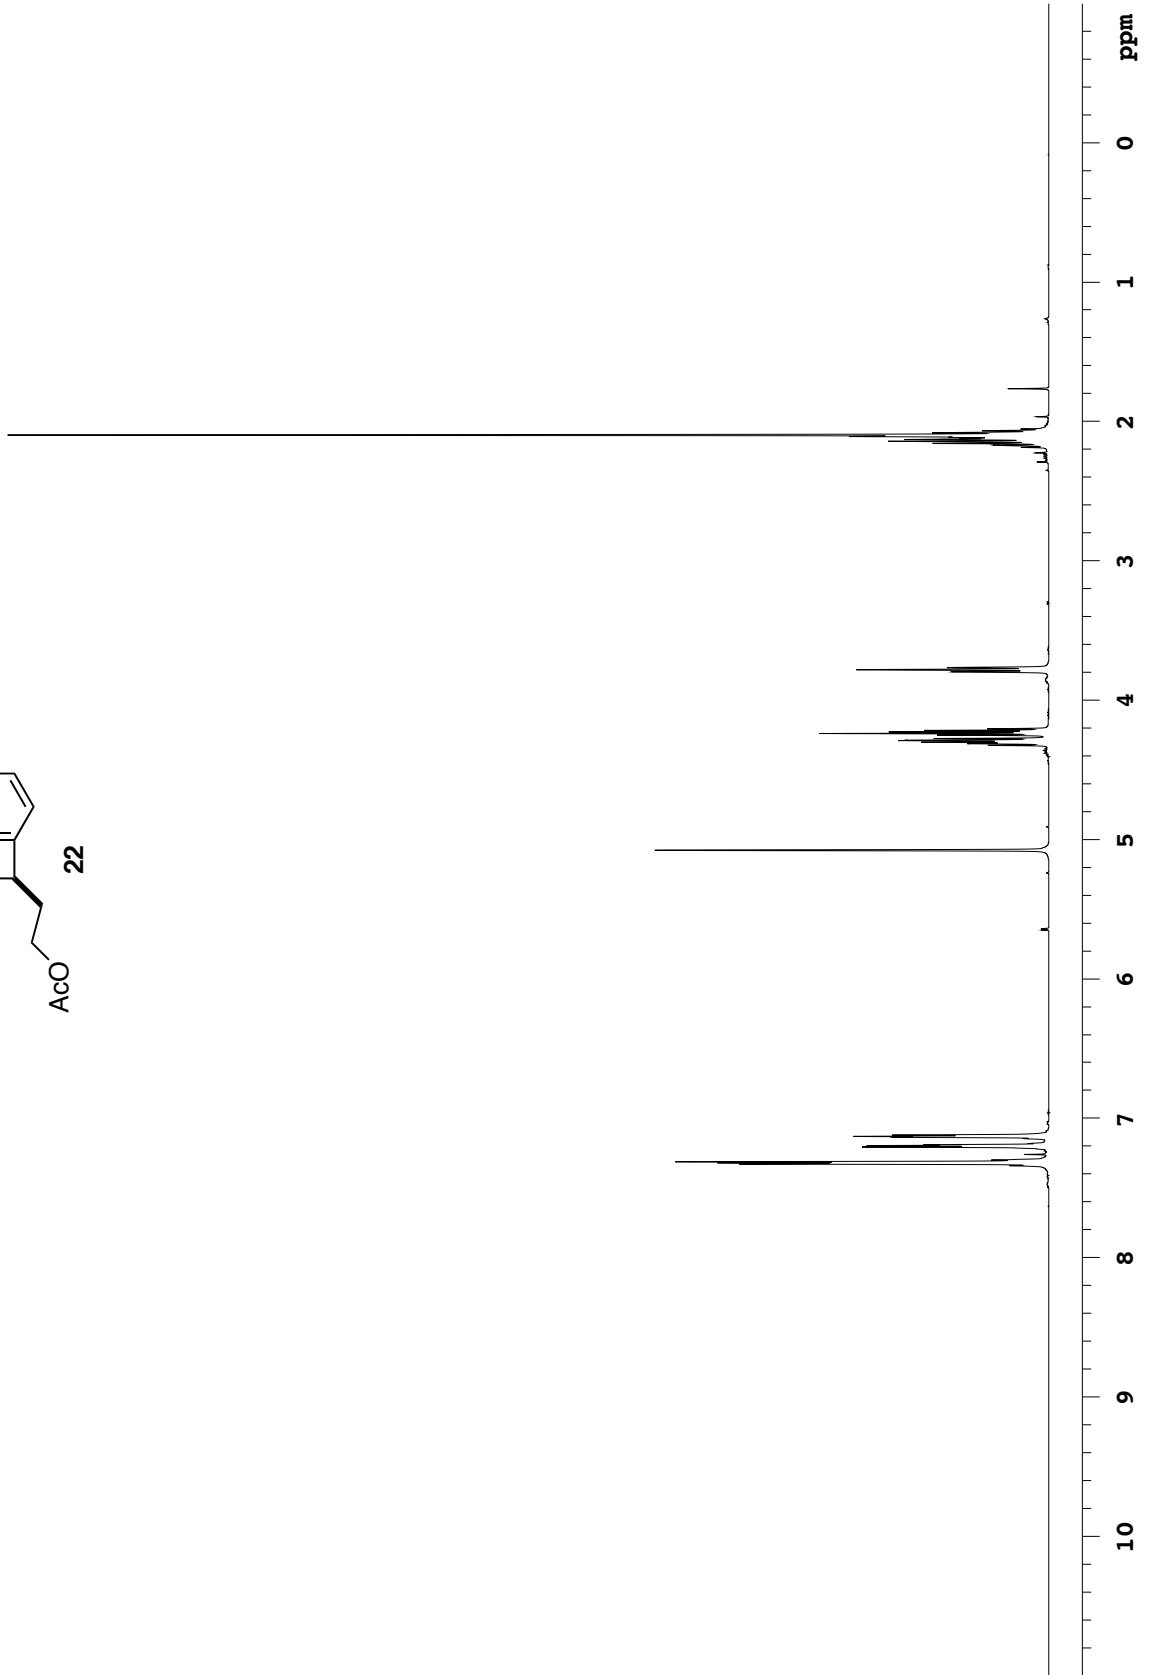

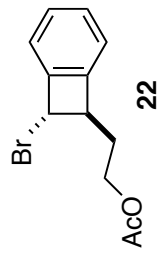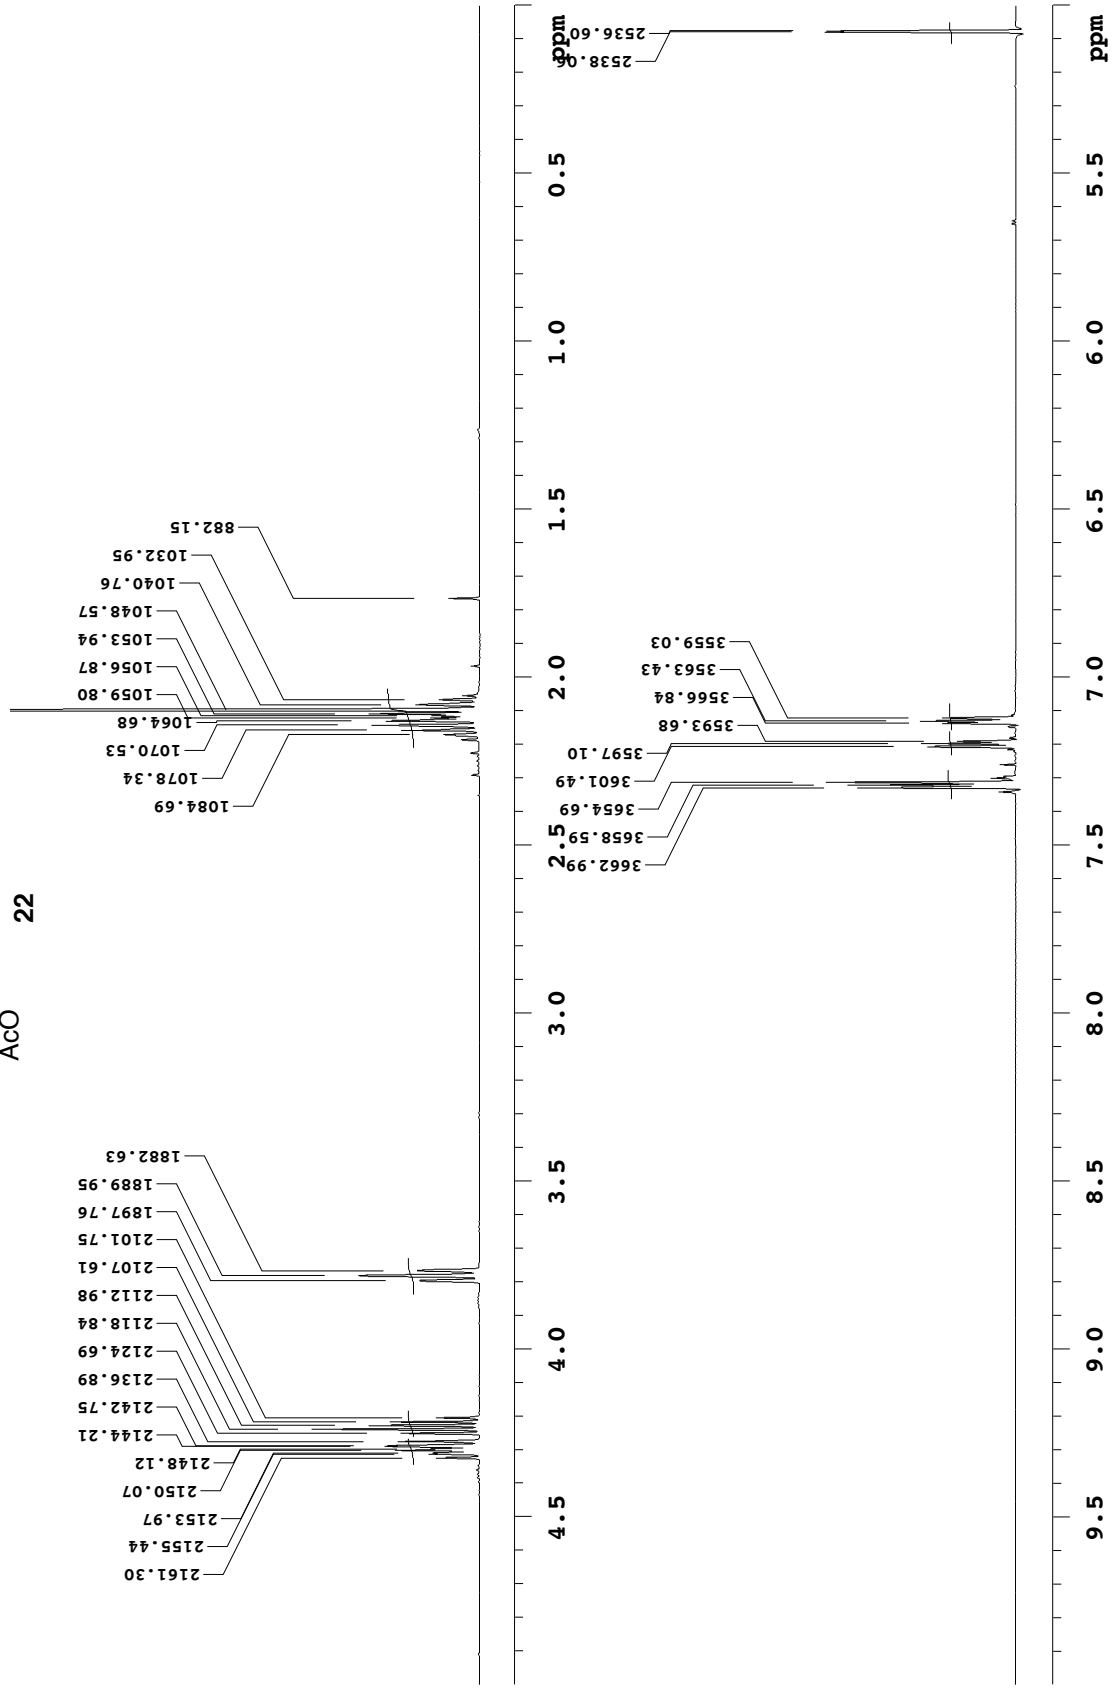

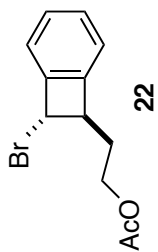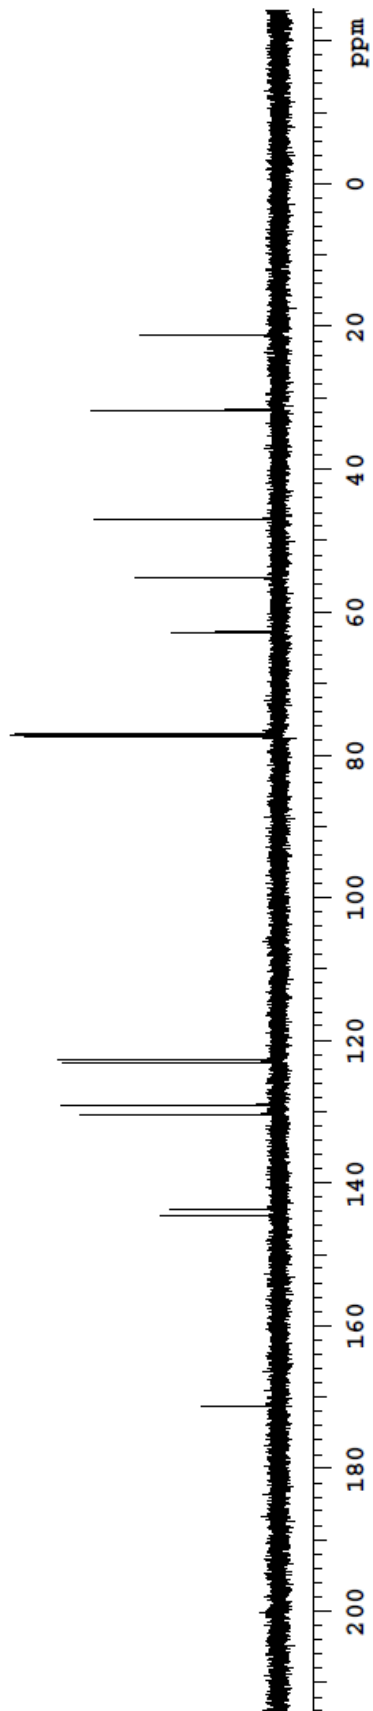

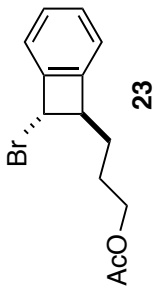

1205-vijay-01-66-1H-cdcl3

Pulse Sequence: s2pul

Solvent: CDCl3

Temp. 25.0 C / 298.1 K

Operator: mkl

File: 1205-vijay-01-66-1H-cdcl3

INOVA-500 "riga"

Relax. delay 2.000 sec

Pulse 38.6 degrees

Acq. time 1.892 sec

Width 8000.0 Hz

32 repetitions

OBSERVE H1, 499.7707193 MHz

DATA PROCESSING

Resol. enhancement 1.0 Hz

Gauss apodization 0.600 sec

FT size 32768

Total time 2 min, 4 sec

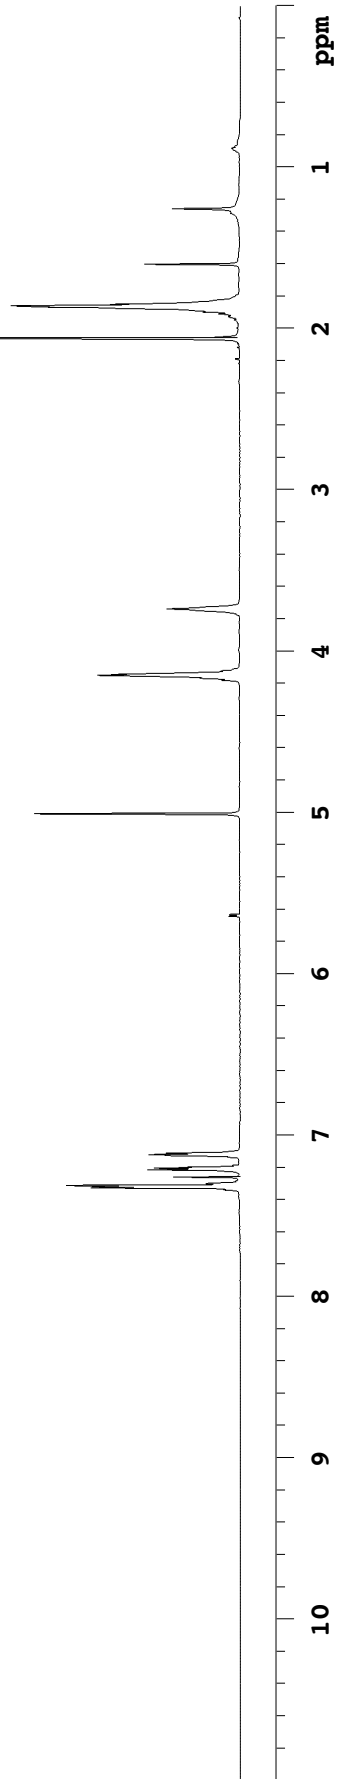

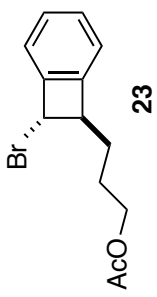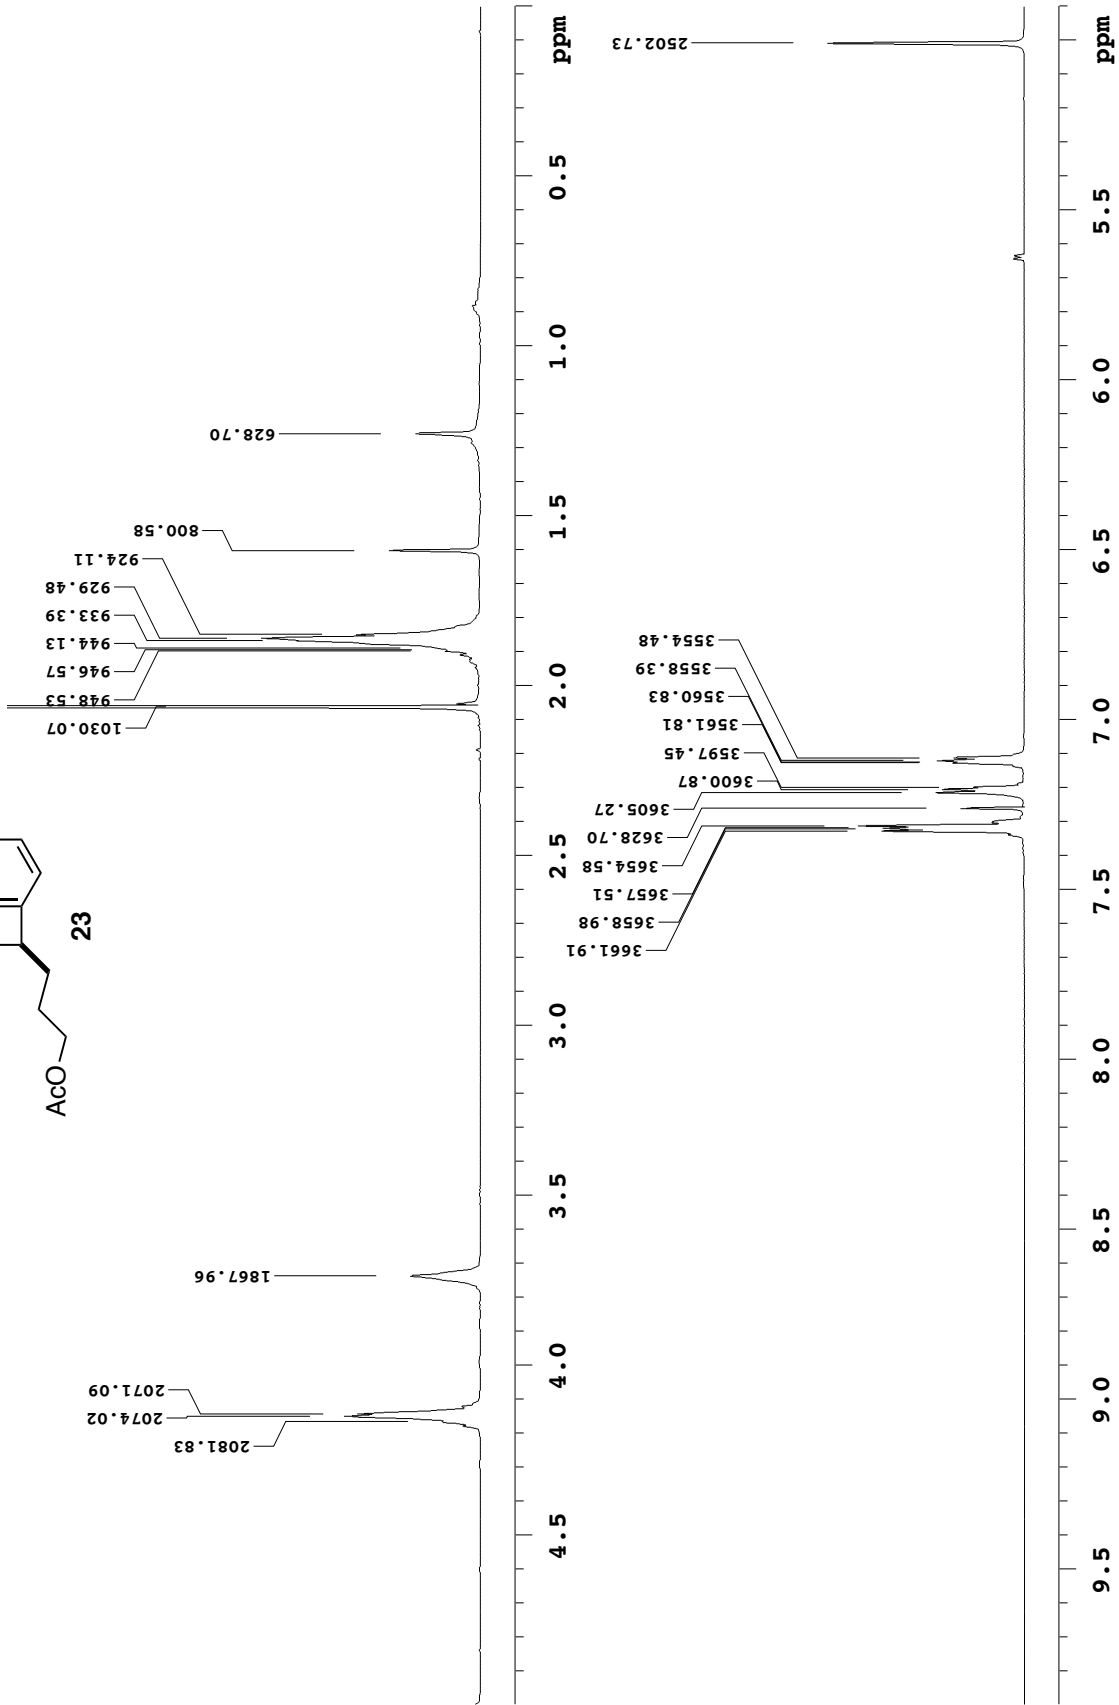

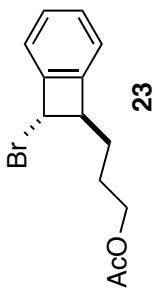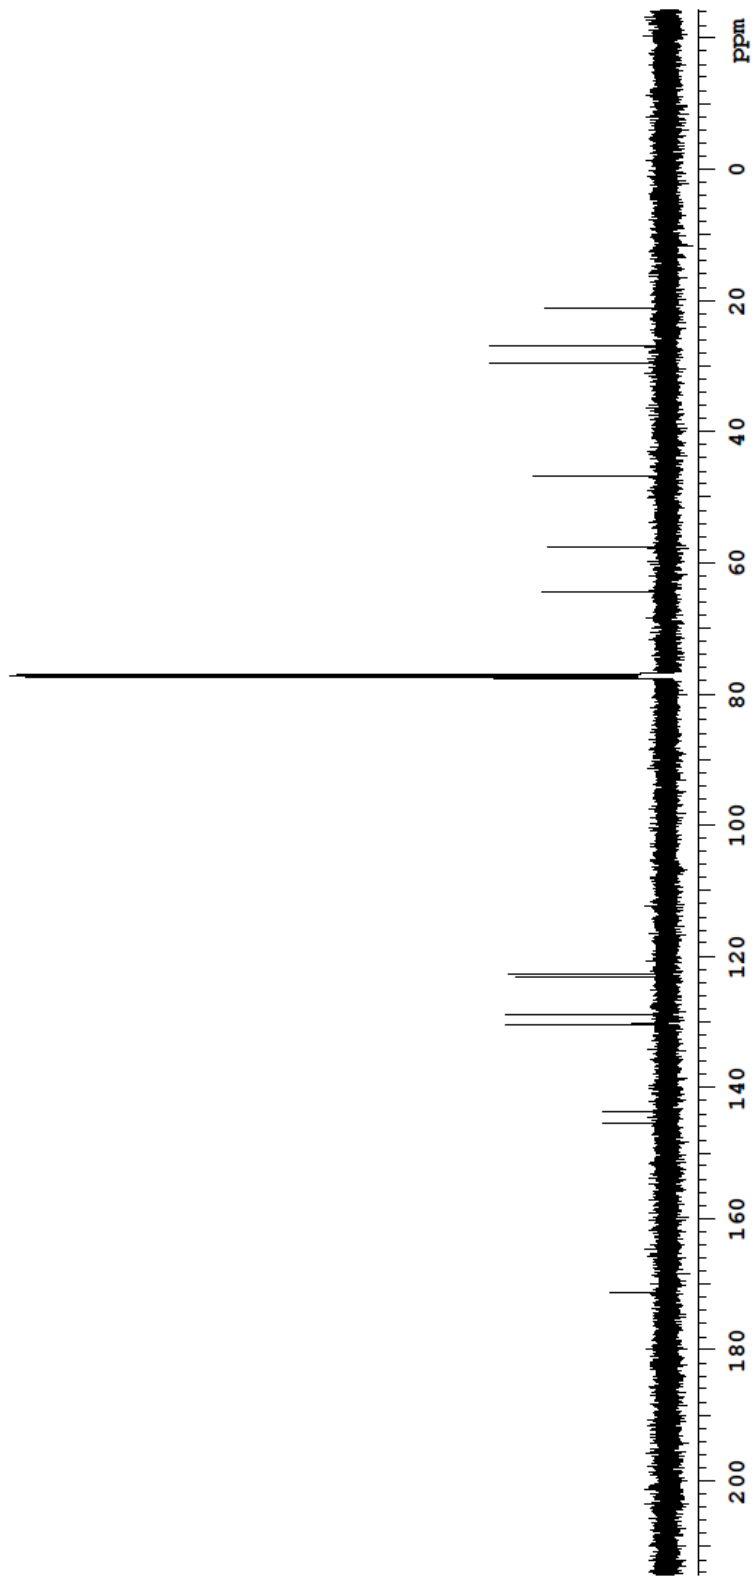

gCOSY spectrum of compound **23** in CDCl<sub>3</sub>

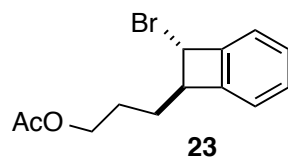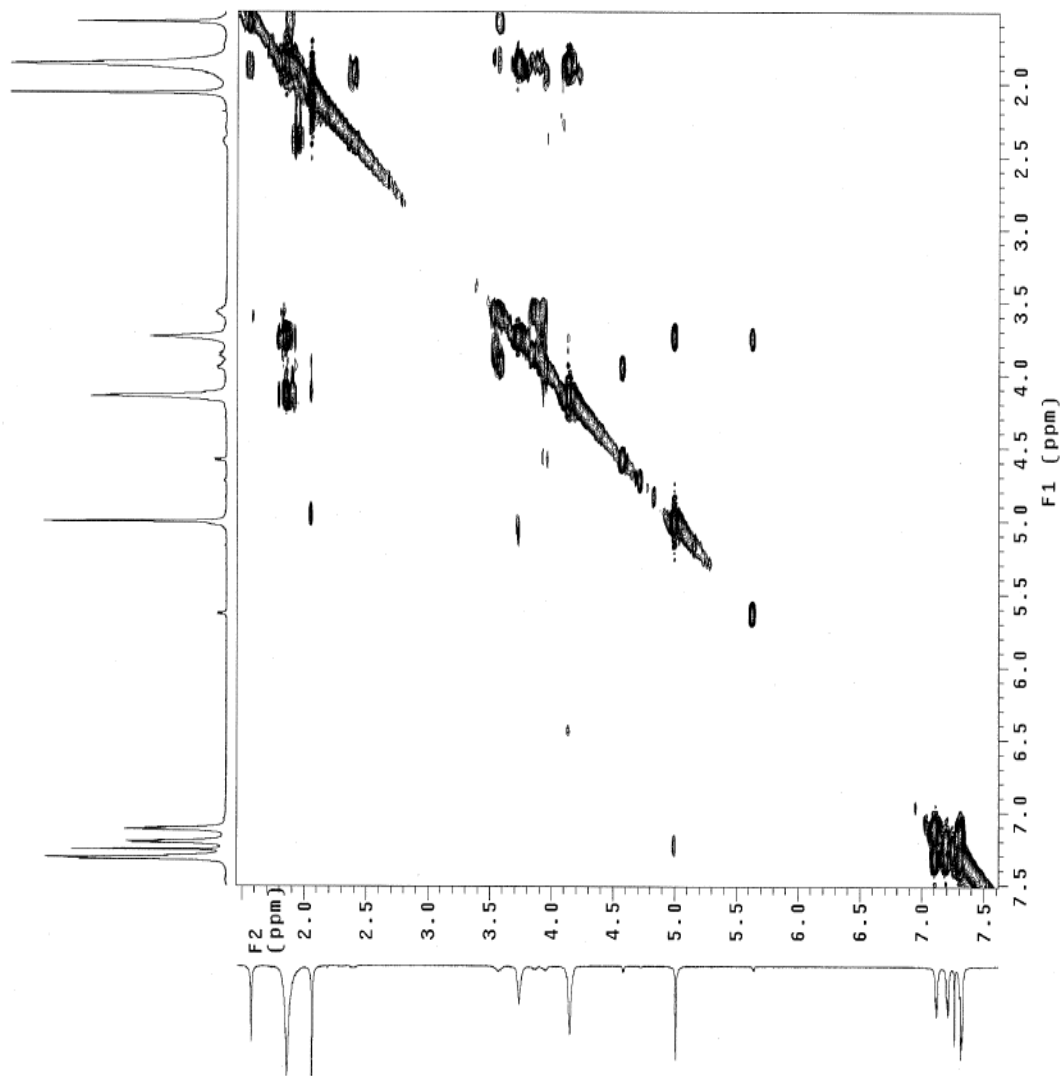



NOESY spectrum of compound **23** in CDCl<sub>3</sub>

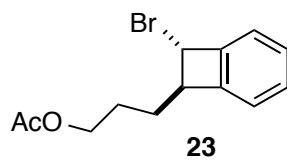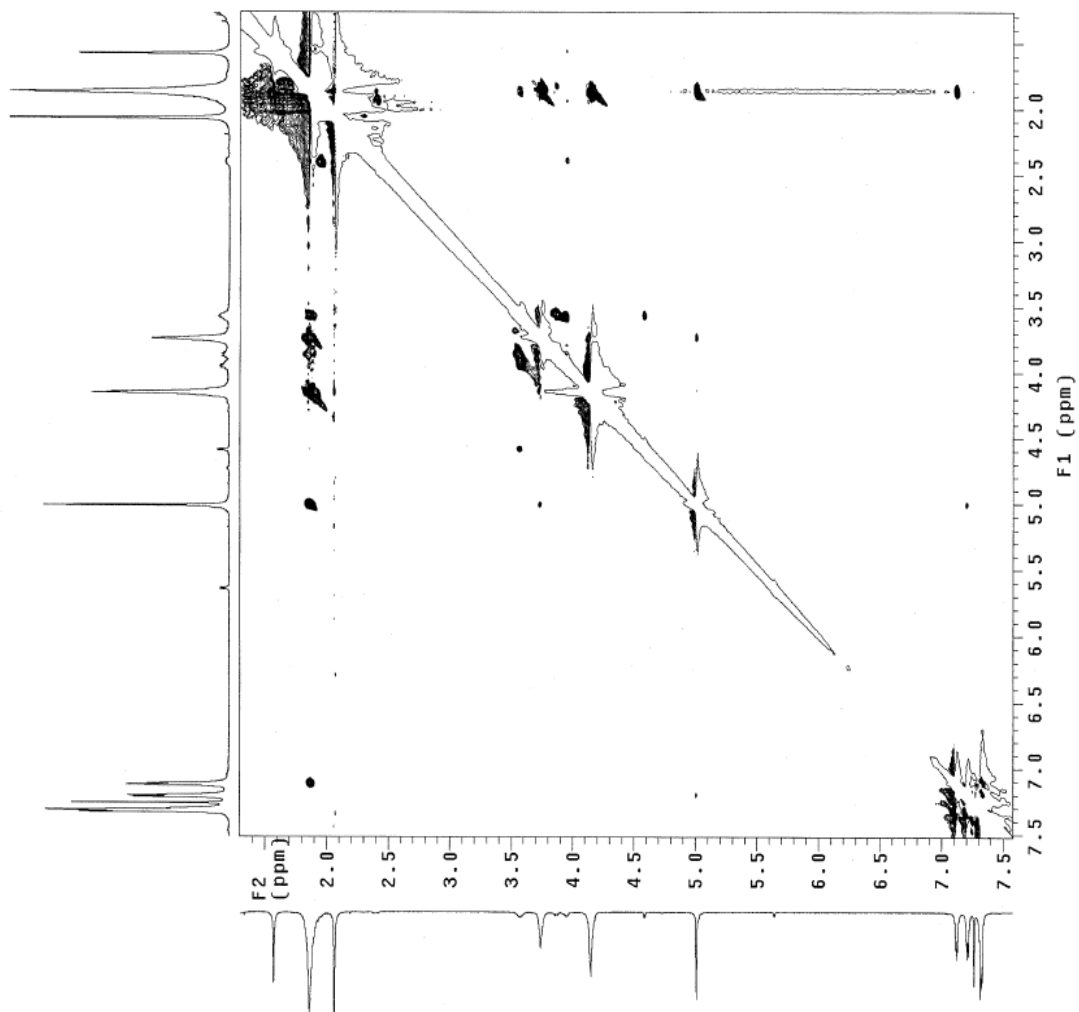

gHMQC spectrum of compound **23** in CDCl<sub>3</sub>

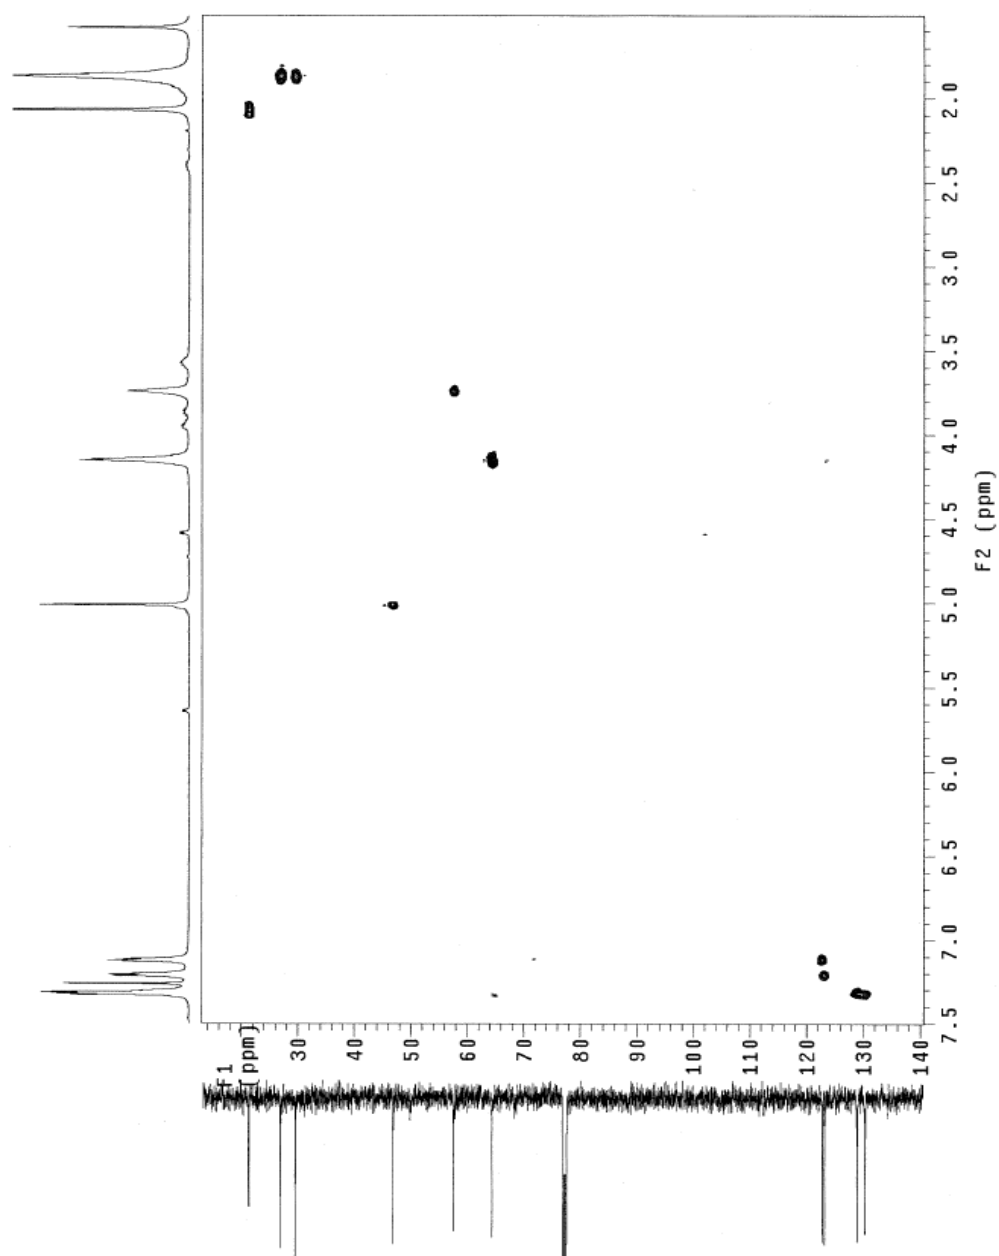



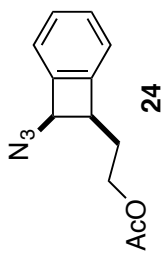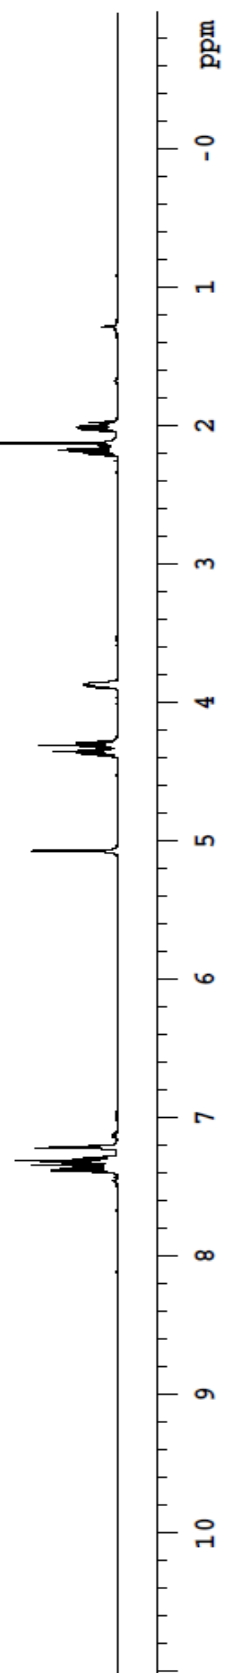

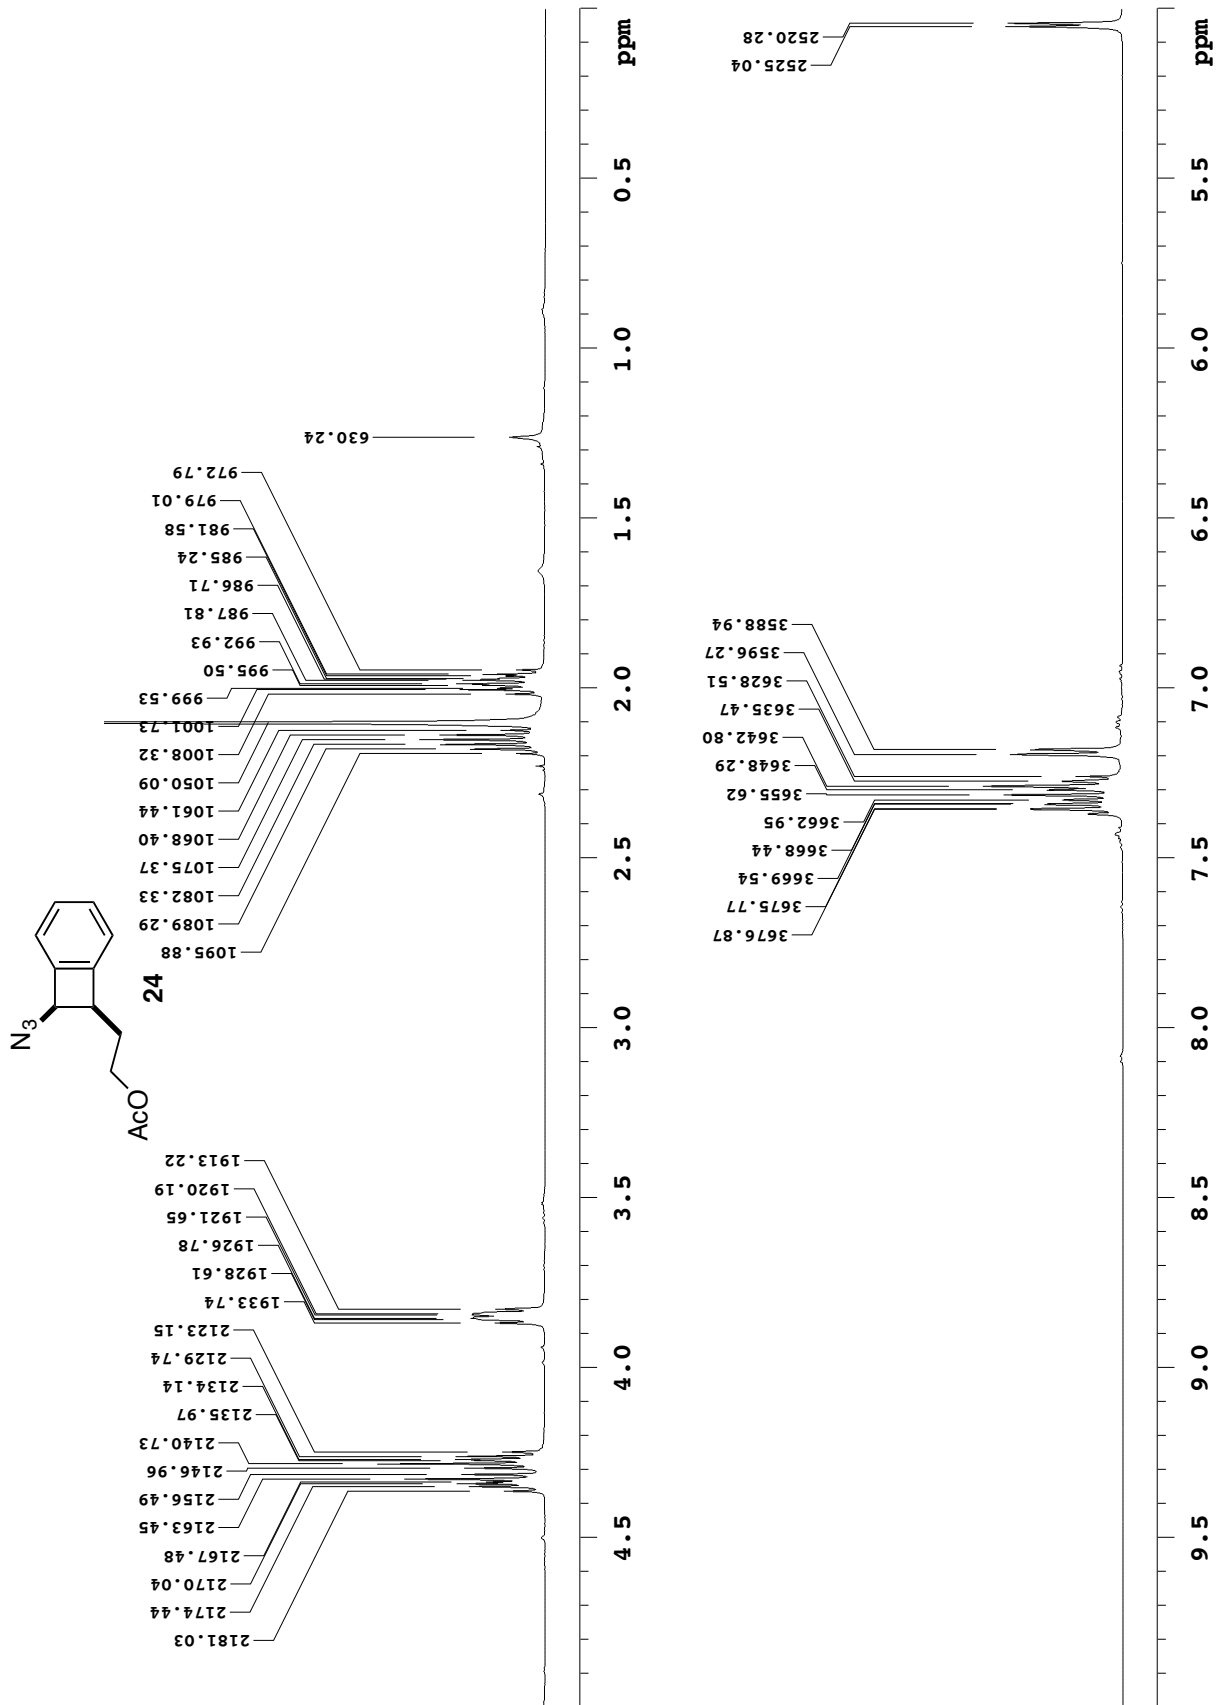

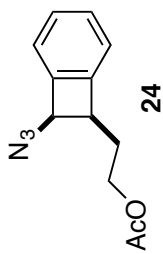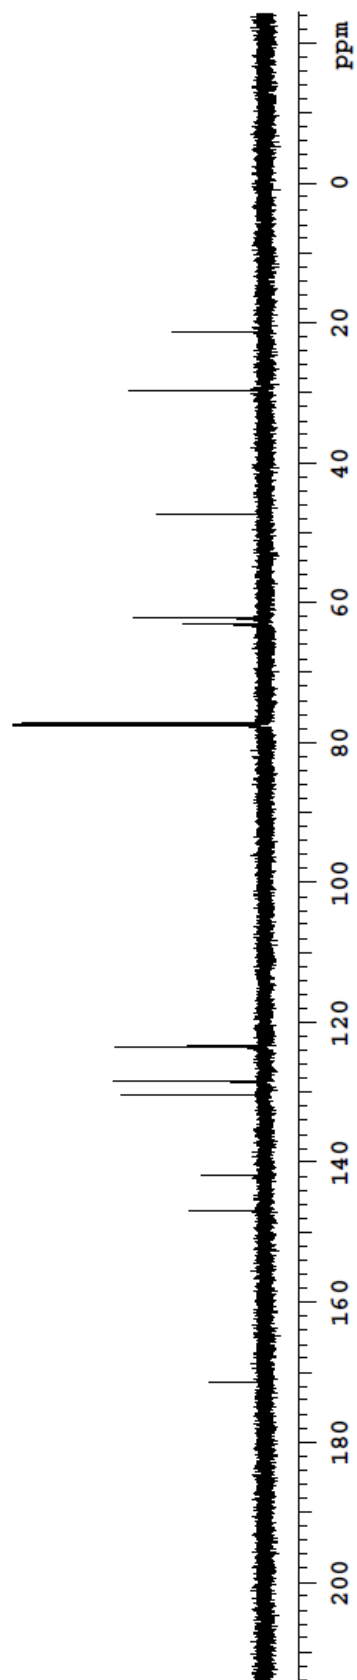

gCOSY spectrum of compound **24** in CDCl<sub>3</sub>

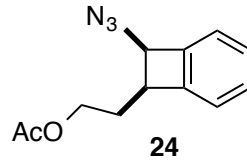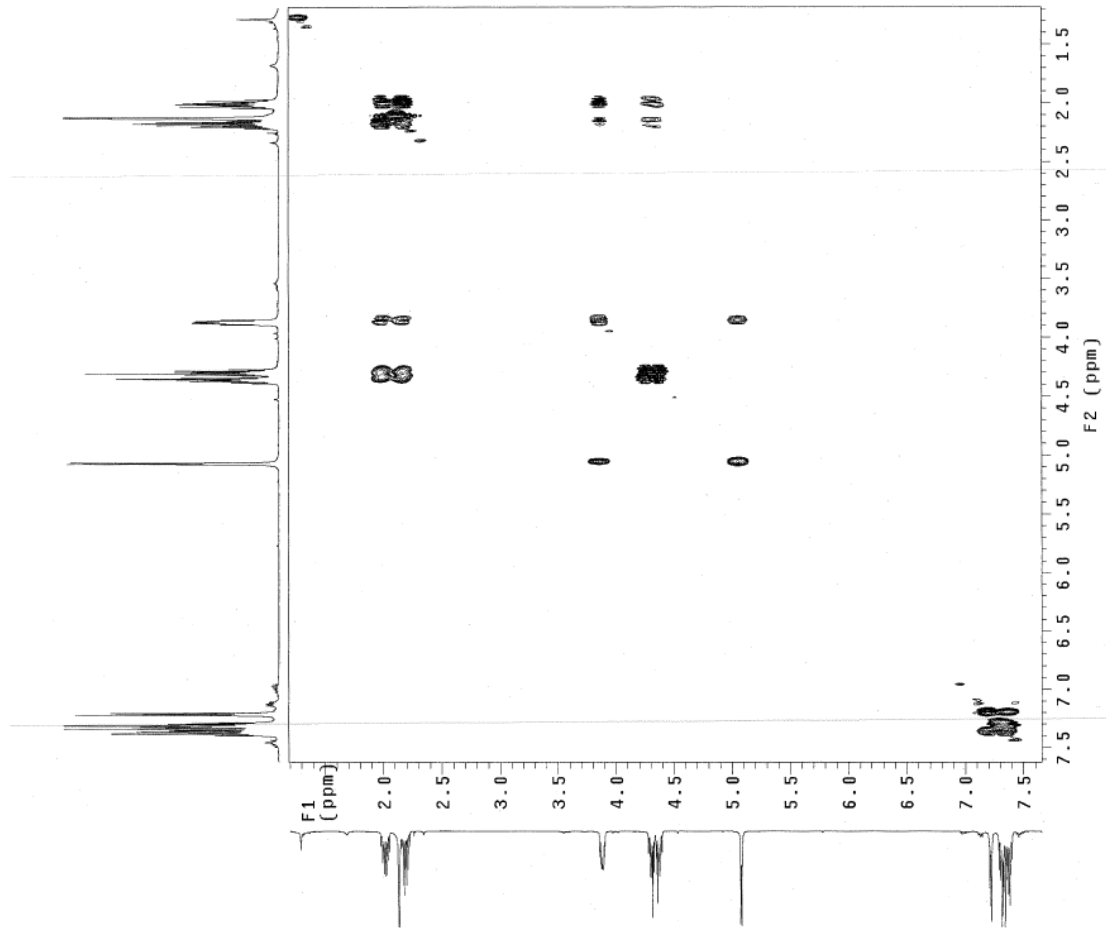

1205-Vijay-04-11-gCOSY-CDCl3  
Pulse Sequence: gCOSY  
Solvent: CDCl3  
Temp: 25.0 C / 298.1 K  
Operator: Vijay  
Date\_1205-Vijay-04-11-gCOSY-CDCl3  
INOVA-500 "riga"  
Relax. delay 1.000 sec  
Acq. time 0.170 sec  
Width 6012.8 Hz  
ZD Width 6012.8 Hz  
F2 132.91 MHz  
132 F2 channels  
OBSERVE F1: 499.770201 MHz  
DATA PROCESSING  
Sf. sine bell 0.885 sec  
F2 Data PROCESSING  
F1 0.000000 sec  
F2 0.000000 sec  
FT size 2048 x 2048  
Total time 1 hr. 32 min. 24 sec

NOESY spectrum of compound **24** in CDCl<sub>3</sub>

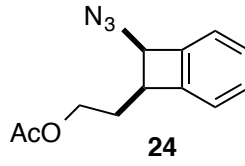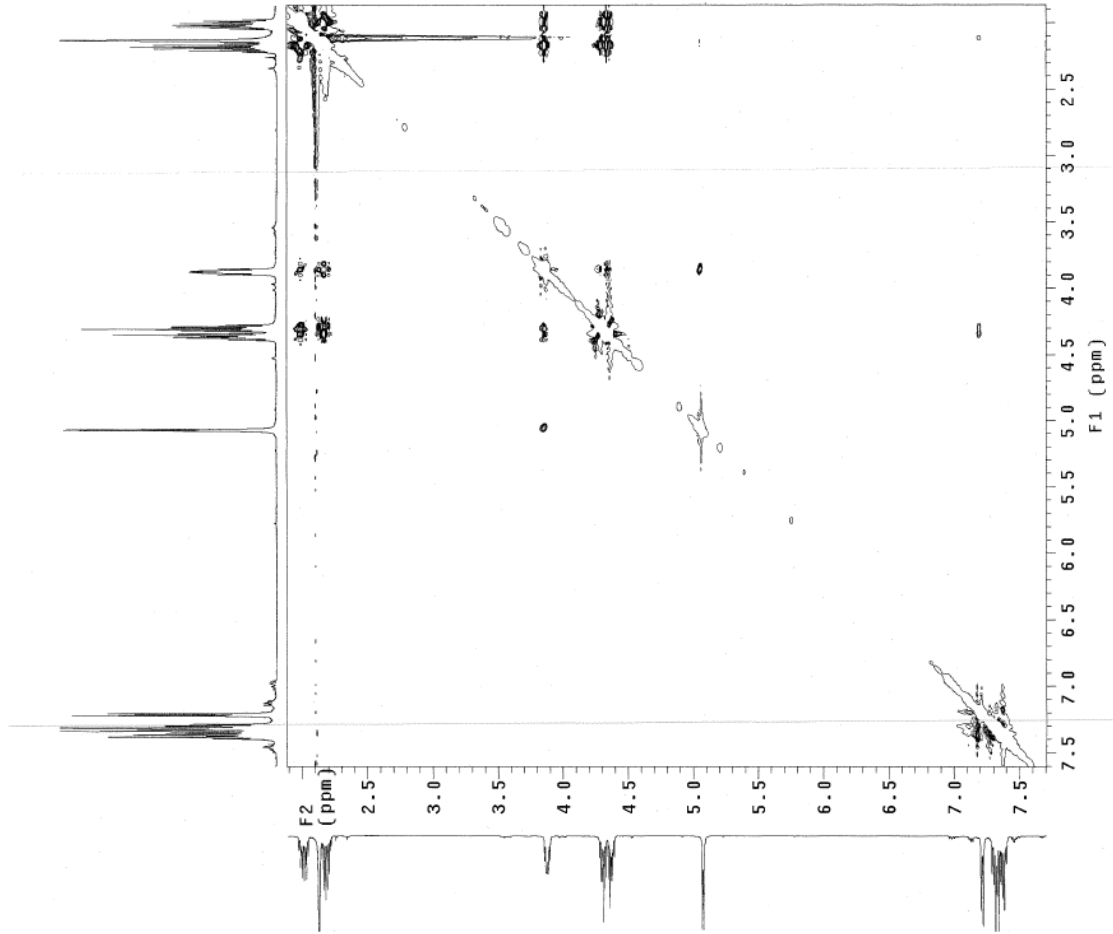

1205-Vijay-04-11-NOESY-CDCl3  
Pulse Sequence: NOESY  
Solvent: CDCl3  
Temp: 25.0 C / 298.1 K  
File: 1205-Vijay-04-11-NOESY-CDCl3  
INOVA-500 "riga"  
Relax. delay 1.000 sec  
Mixing 0.400 sec  
Acq. time 0.170 sec  
Width 6014.6 Hz  
F2 Width 6014.6 Hz  
1.000 sec  
2 x 192 increments  
OBSERVE H1, 499.7707210 MHz  
DATA PROCESSING  
Gauss apodization 0.079 sec  
F2 apodization 0.031 sec  
F2 size 2048 x 2048  
Total time 2 hr, 45 min, 3 sec



gHMQC spectrum of compound **24** in CDCl<sub>3</sub>

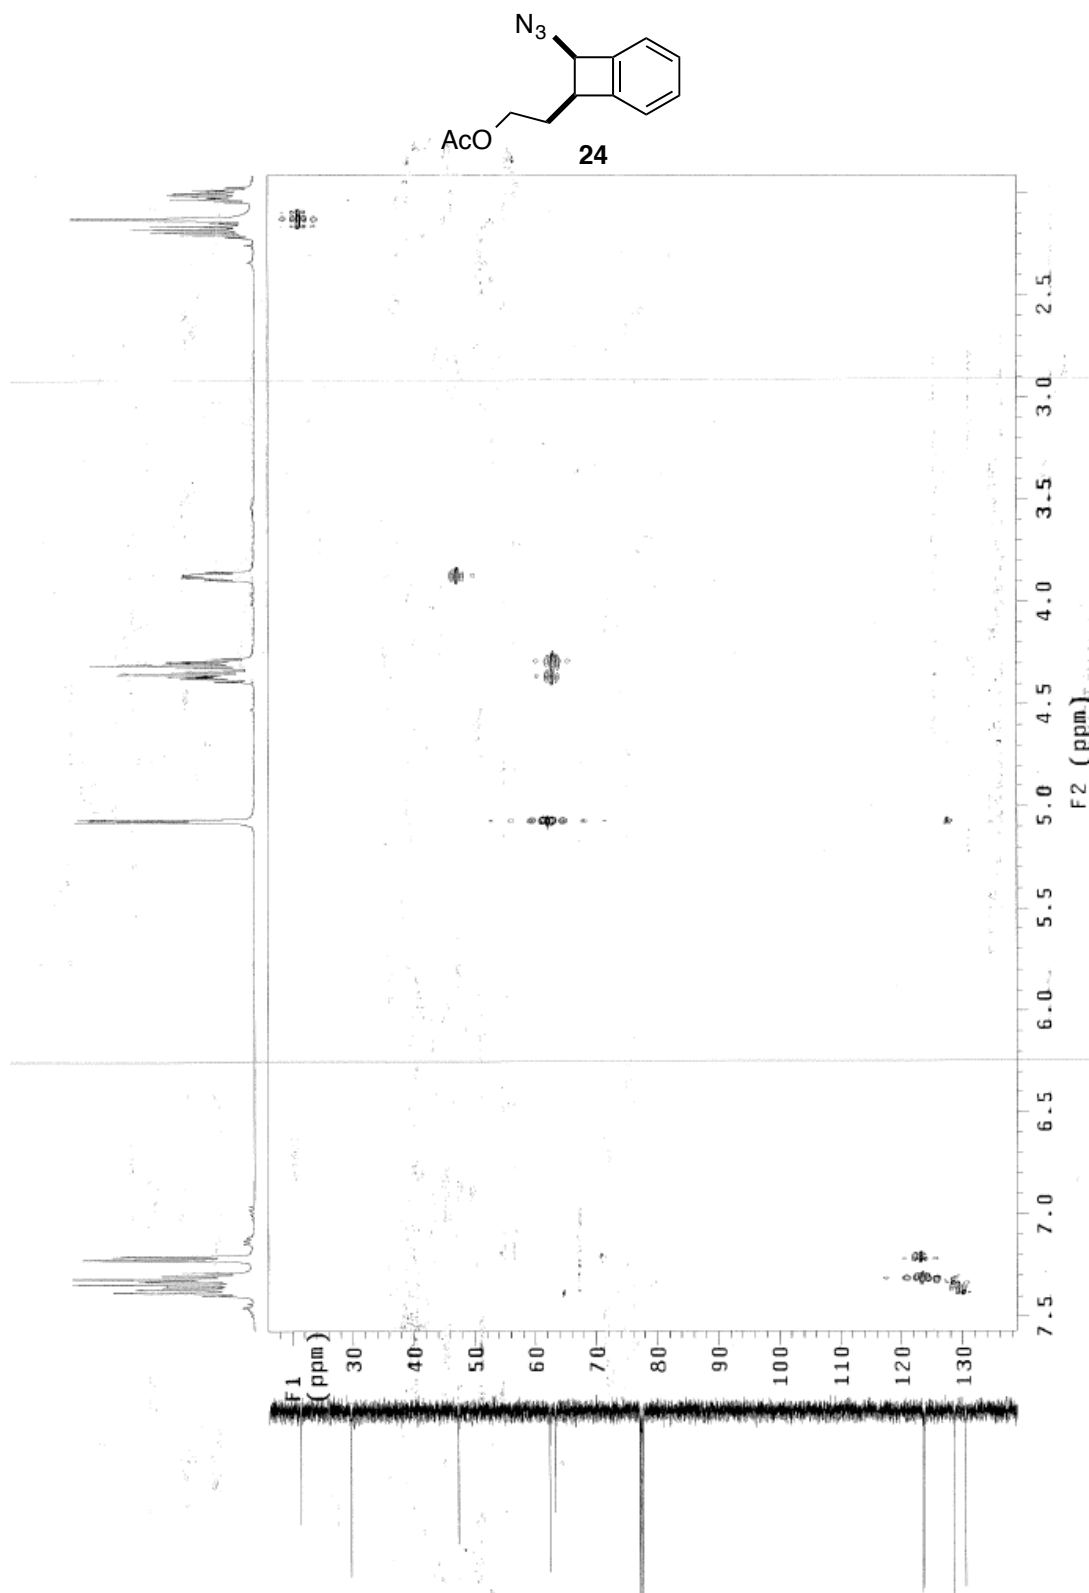

HMBC spectrum of compound **24** in CDCl<sub>3</sub>

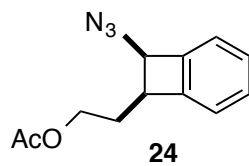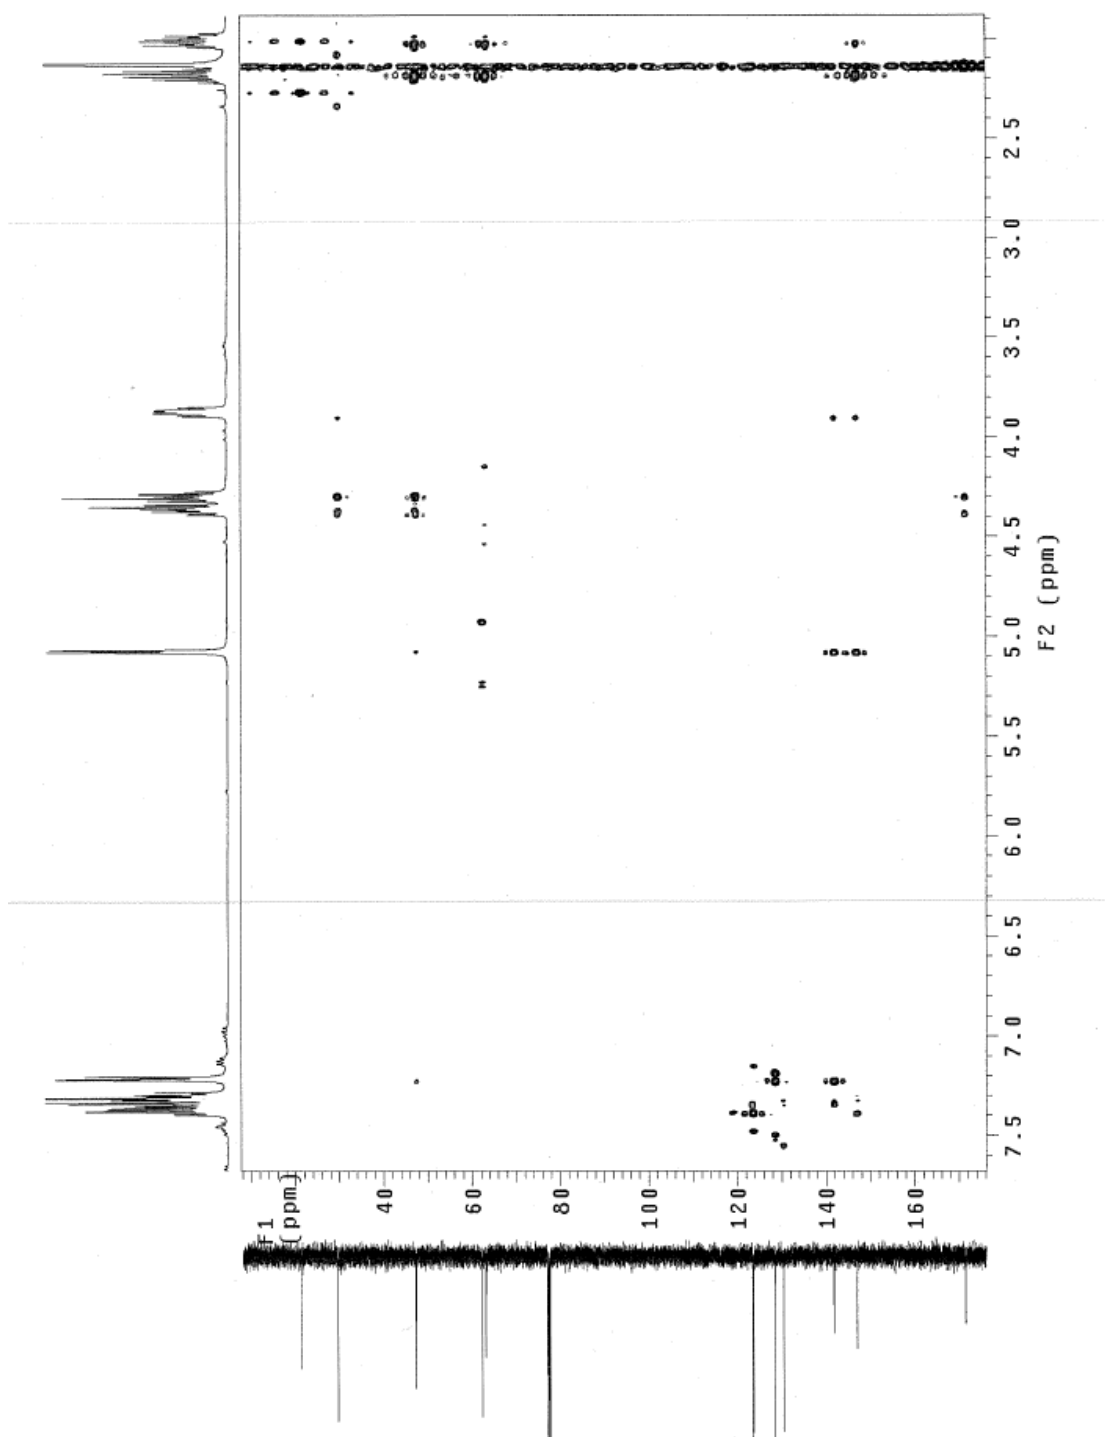

IR spectrum of compound 24

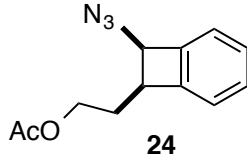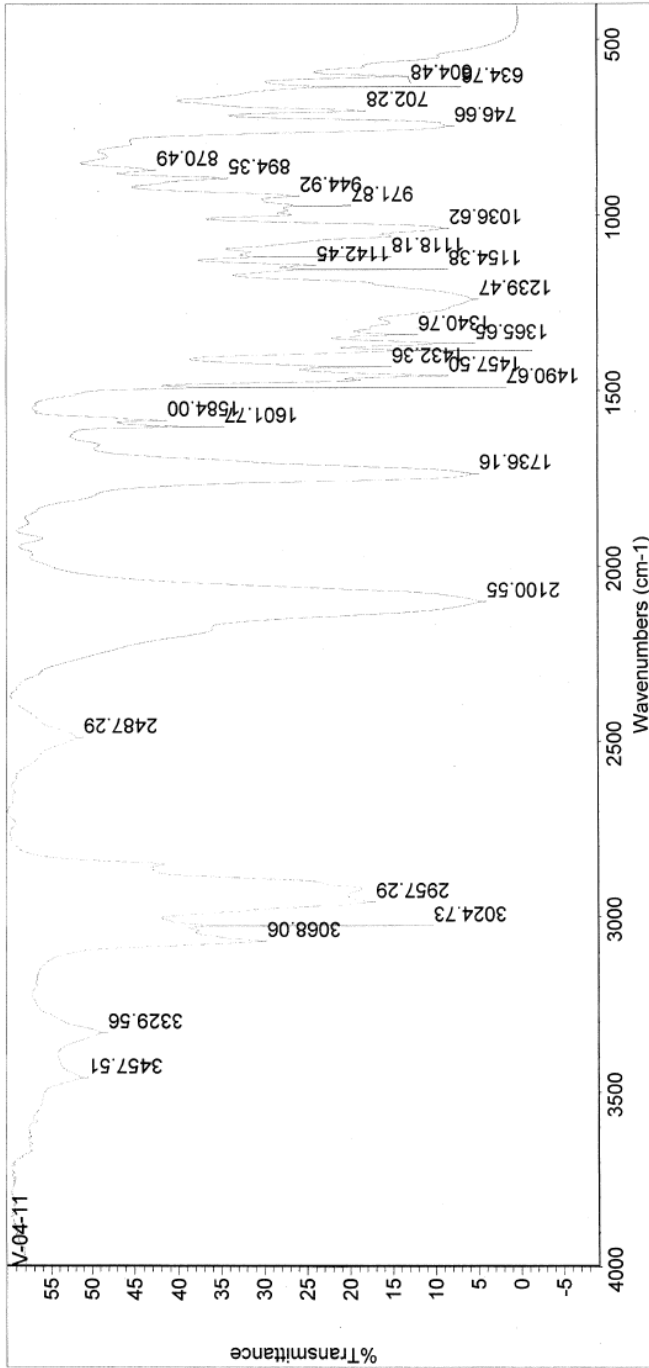

Wed Jan 08 14:46:34 2014 (GMT-05:00)

FIND PEAKS:

Spectrum: V-04-11  
 Region: 4000.00 400.00  
 Absolute threshold: 52.320  
 Sensitivity: 50  
 Peak list:

| Position: | Intensity: |
|-----------|------------|
| 604.48    | 13.572     |
| 634.76    | 23.875     |
| 702.28    | 18.801     |
| 746.66    | 8.528      |
| 870.49    | 43.264     |
| 894.35    | 34.868     |
| 944.92    | 26.590     |
| 971.87    | 26.331     |

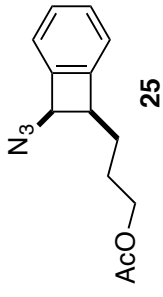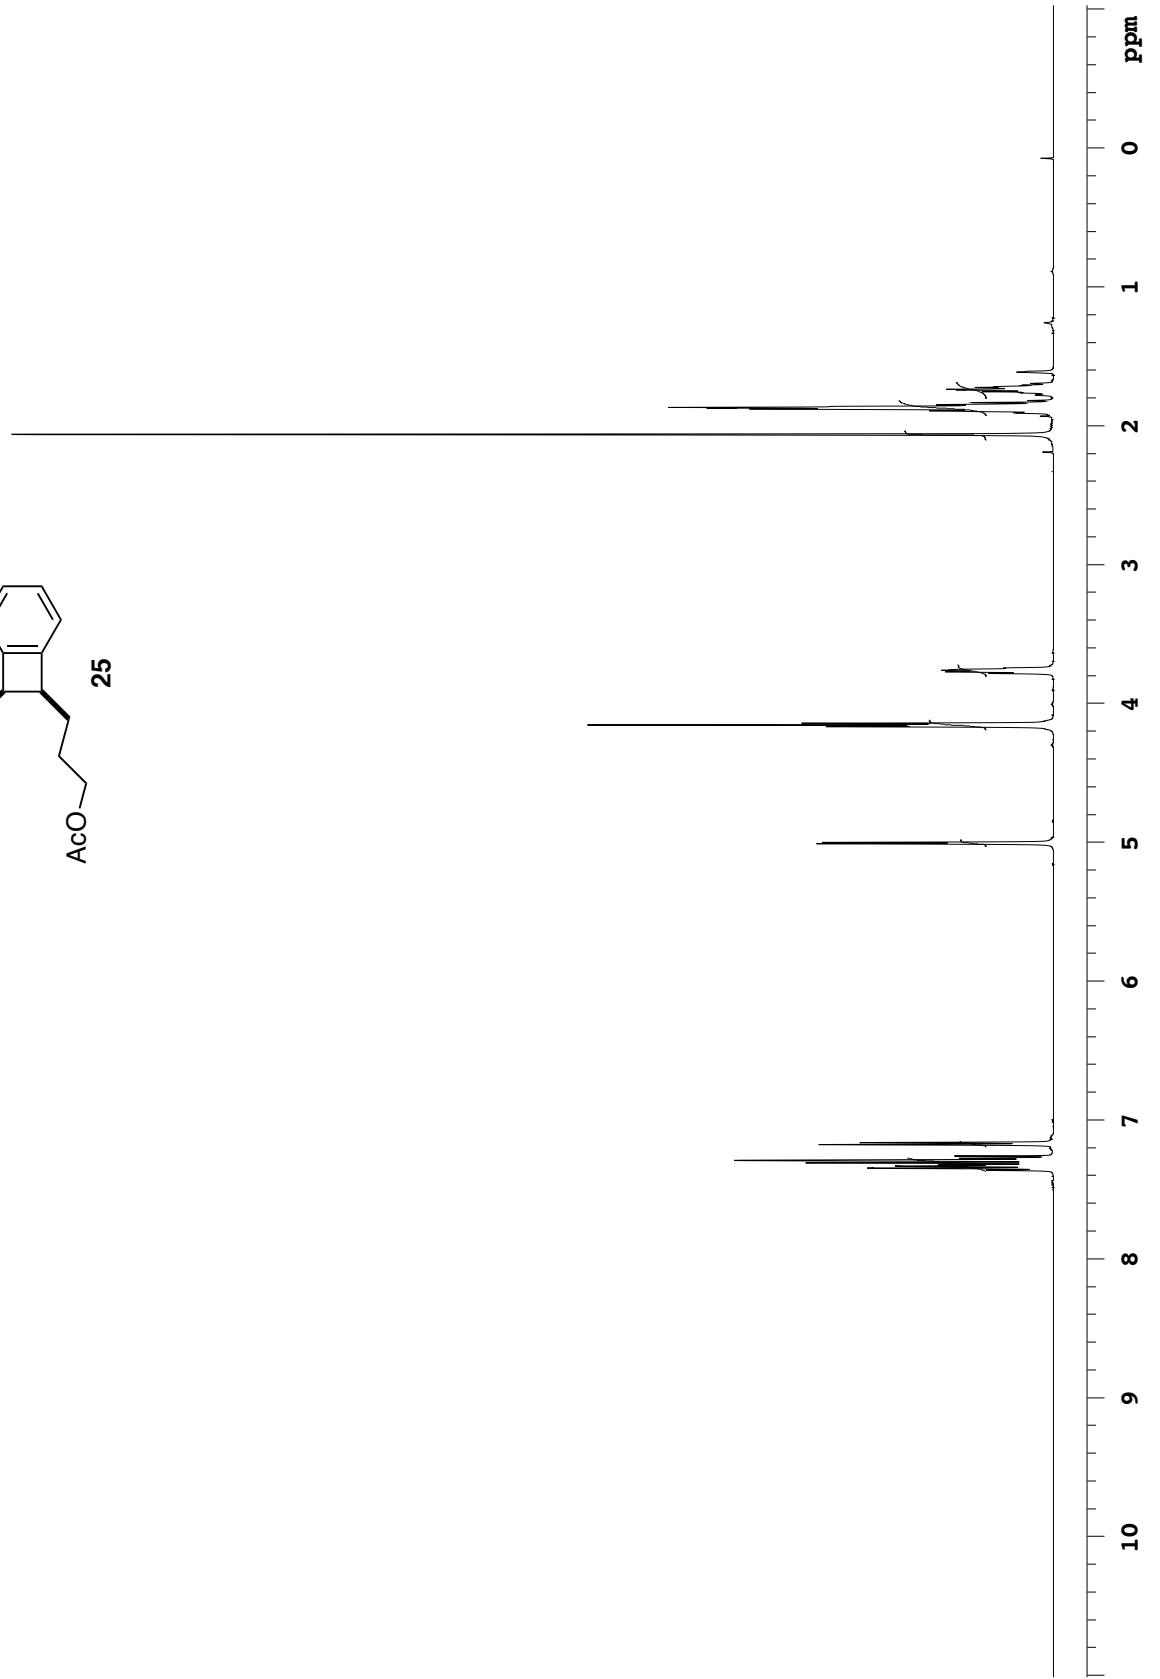



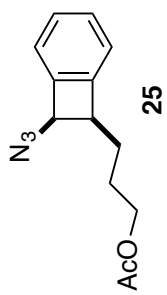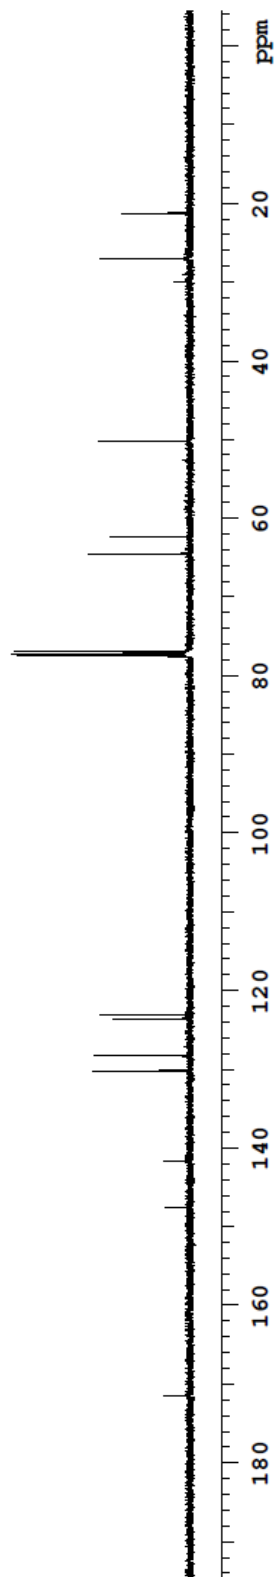

gCOSY spectrum of compound **25** in CDCl<sub>3</sub>

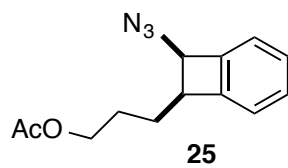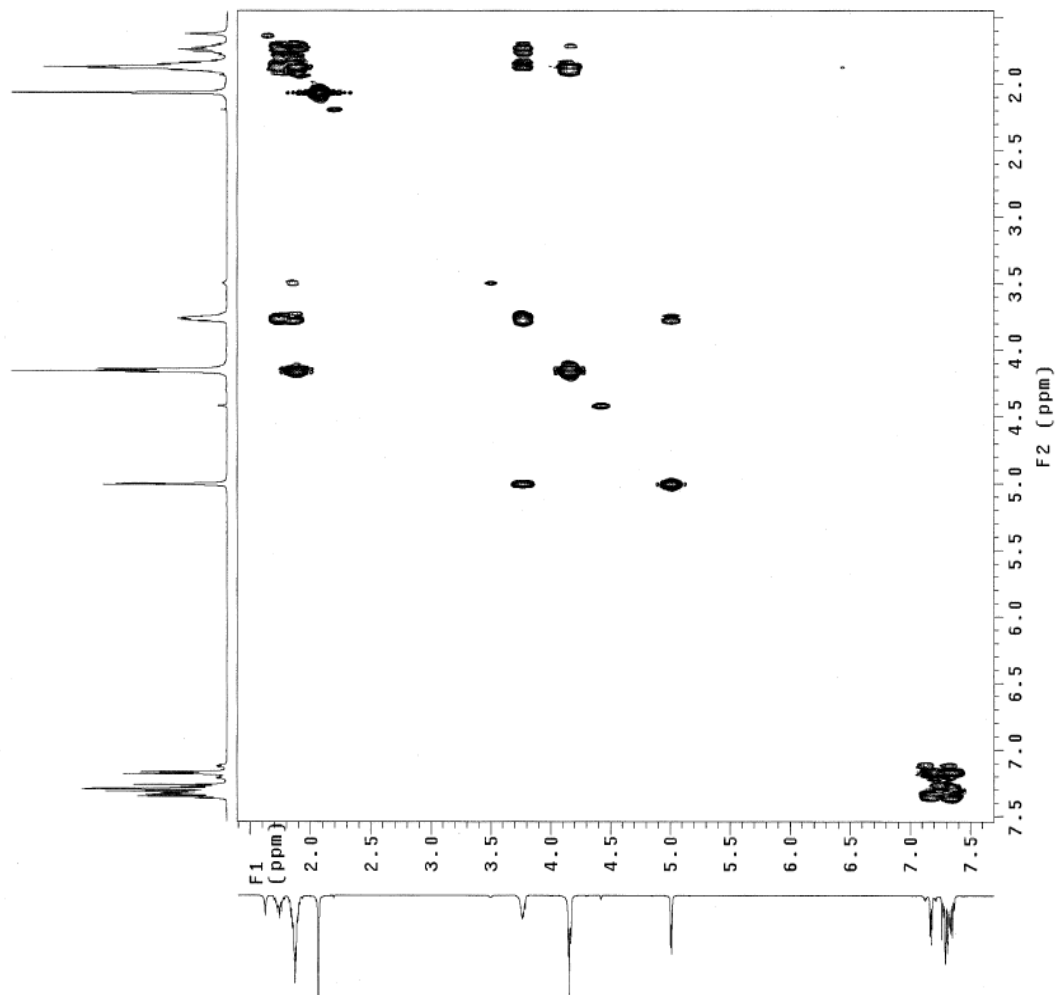

NOESY spectrum of compound **25** in CDCl<sub>3</sub>

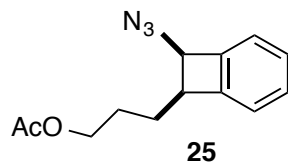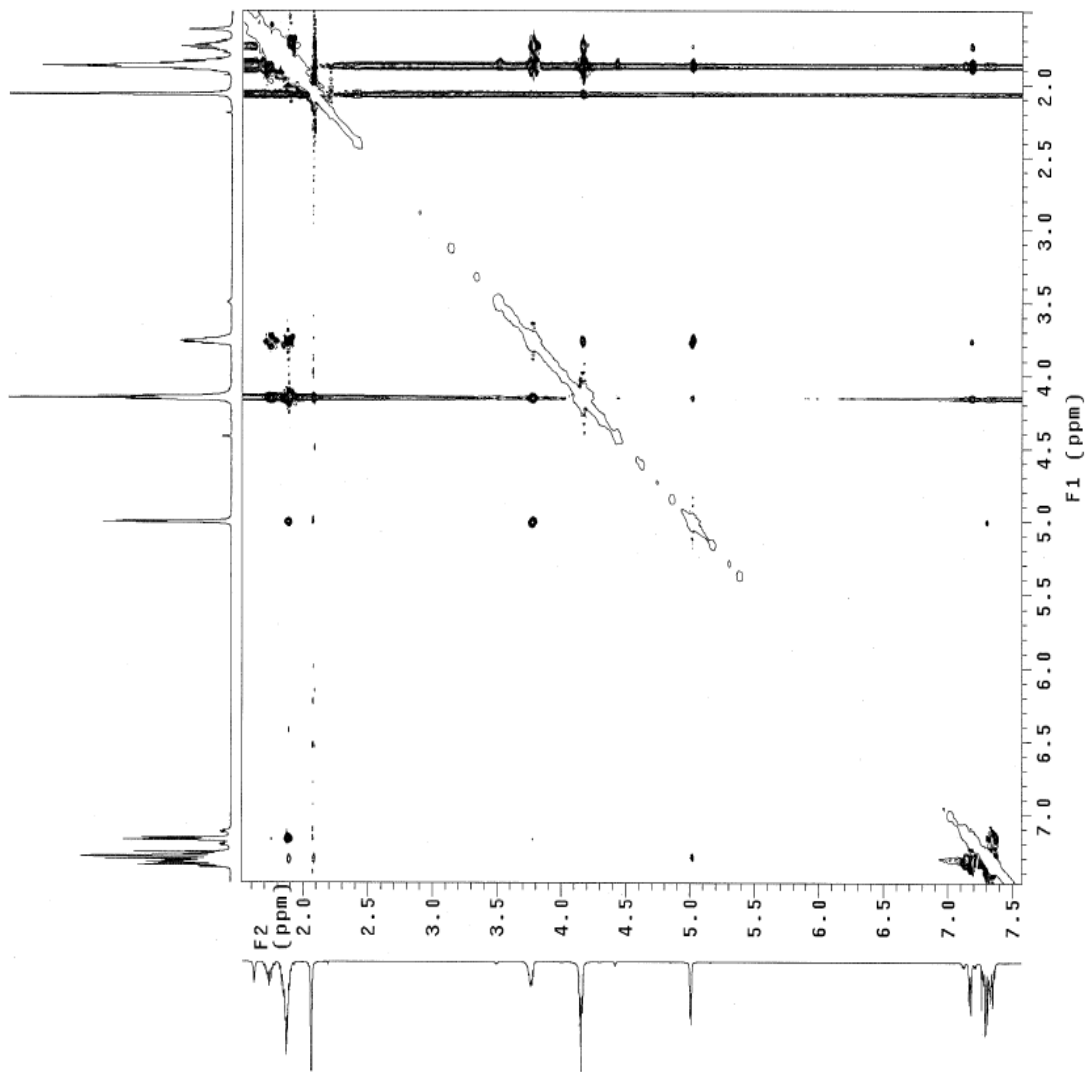



gHMQC spectrum of compound **25** in CDCl<sub>3</sub>

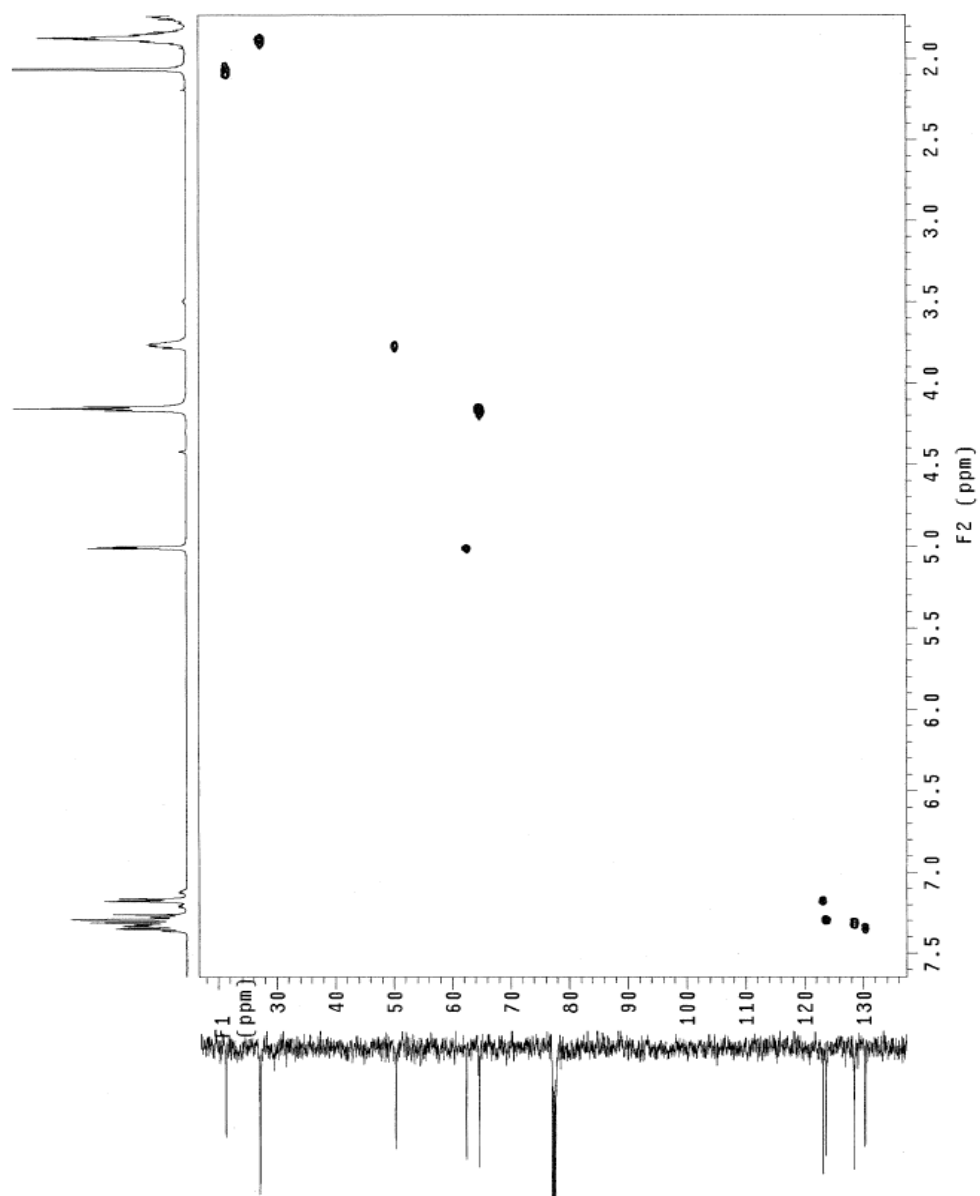

HBMC spectrum of compound **25** in CDCl<sub>3</sub>

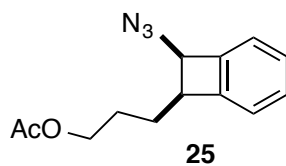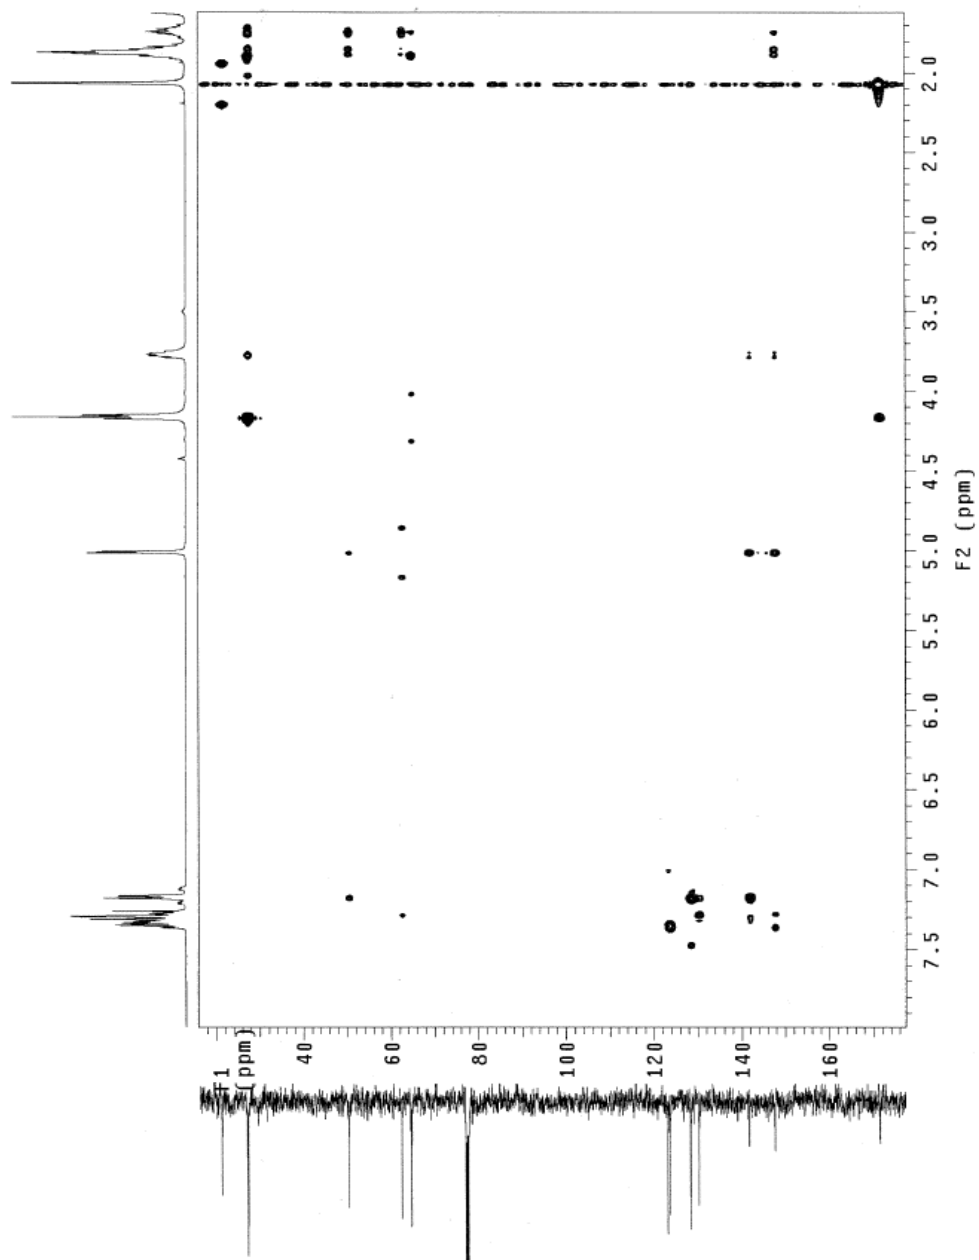

IR spectrum of compound 25

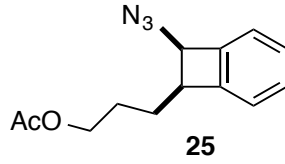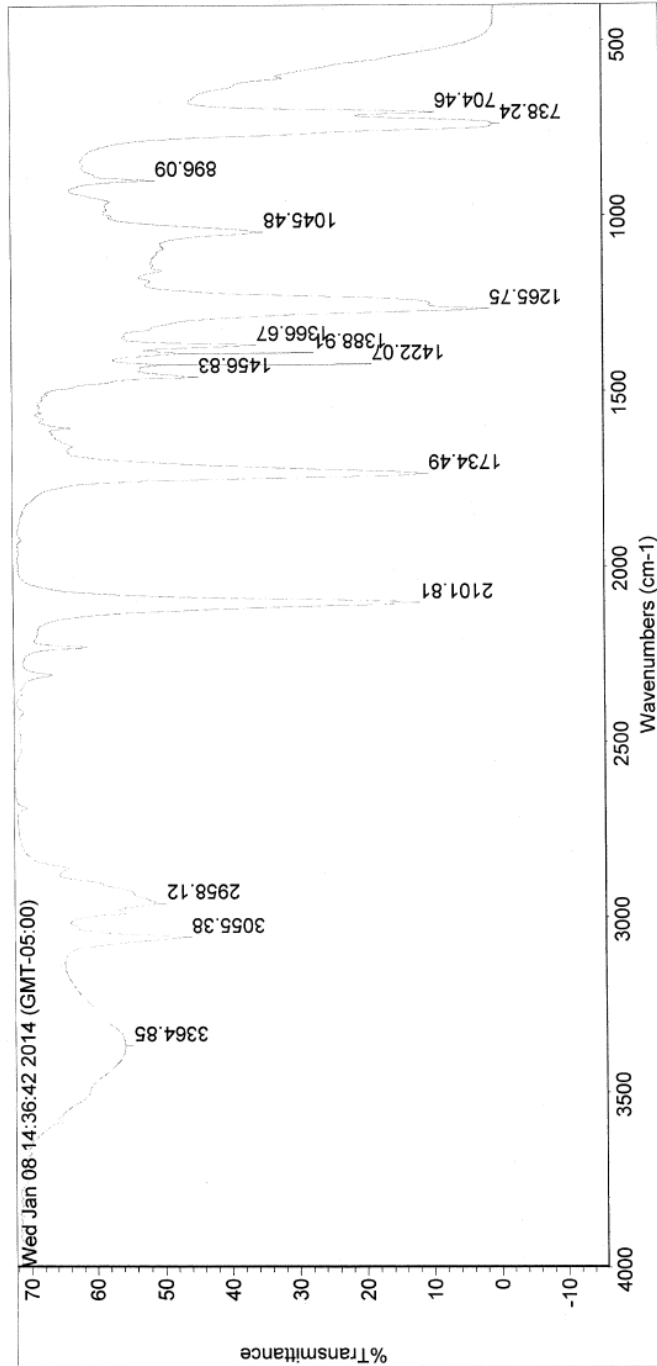

Wed Jan 08 14:41:32 2014 (GMT-05:00)

FIND PEAKS:

Spectrum: Wed Jan 08 14:36:42 2014 (GMT-05:00)  
 Region: 4000.00 400.00  
 Absolute threshold: 58.251  
 Sensitivity: 50

| Position: | Intensity: |
|-----------|------------|
| 704.46    | 10.351     |
| 738.24    | 0.521      |
| 896.09    | 51.881     |
| 1045.48   | 35.829     |
| 1265.75   | 2.309      |
| 1366.67   | 37.014     |
| 1388.91   | 47.385     |
| 1422.07   | 50.353     |
